# Supplementary material for: Capturing ultrafast energy flow of a heme protein in crowded milieu
Source: Royal Society of Chemistry journal article supplement (doi:10.1039/d4cp03319a), 2024-01-01

## Supporting Information

### Capturing Ultrafast Energy Flow of a Heme Protein In Crowded Milieu

Shubhangi Majumdar, Ambika Prasad Kar, Jaydeep Basu, Pramit K Chowdhury\*

Department of Chemistry, Indian Institute of Technology Delhi,

Hauz Khas, New Delhi 110016

\* To whom correspondence should be addressed:

Email : [pramitc@chemistry.iitd.ac.in](mailto:pramitc@chemistry.iitd.ac.in)

Tel : +911126591521

## Experimental Section:

### Details of Global Analyses

To analyze the complex transient absorption spectra (TAS), first, we fitted single wavelength decay profiles at the corresponding excited state absorption maxima to gain prior knowledge about the time constants (Figure 1E and F, SI Tables S1, S5-S9 and SI Figures S3). However, the time constants extracted from a single wavelength fit may represent a composite of multiple coinciding processes owing to overlapping features in TA spectra. Systematically fitting and analyzing each individual wavelength can be quite laborious and time-consuming. Therefore, the dynamical parameters are derived by fitting the complete set of TA spectra through global analysis.<sup>1-3</sup> The global analysis assumes that the data are completely separable spectrally and temporally, where the data matrix is represented as follows.

$$\Delta A_{exp}(\lambda, t) = S(\lambda) \cdot C(t) \quad (S1)$$

$S(\lambda)$  is representing transient absorption spectra as a function of wavelength in the form of ‘m’ by ‘k’ matrix and  $C(t)$  is for the time-dependent one, denoted by the ‘k’ by ‘n’ matrix. Here, ‘m’ stands for wavelengths, ‘n’ as delay time points, and ‘k’ represents no. of distinct spectral components used to reproduce the spectra, assuming each component to have single exponential kinetics.<sup>1-3</sup>

Then, singular value decomposition algorithm using glotaran software was applied to the data matrices (as mentioned above) based on the guess values (values of ‘k’) obtained from the single wavelength fitting, to obtain the timescales of global dynamics associated with the species as described below.<sup>1-3</sup> The variation of the amplitude of each time component spectrally over the entire wavelength range is obtained in the form of corresponding Decay-associated spectra (DAS) or Decay-associated difference spectra (DADS). For obtaining DAS, we generated  $C_{guess}(t)$  and obtained  $S_{fit}(\lambda)$  as shown below.

$$S = A(C^T C)^{-1} C^T \quad (S2)$$

$$[S_{fit}(\lambda) = S, \Delta A_{exp}(\lambda, t) = A \text{ and } C_{guess}(t) = C]$$

$$S = A \cdot C^+ \quad (S3)$$

Where  $C^+$  is the Moore-Penrose pseudoinverse, denoted as  $C^+ = (C^T C)^{-1} C^T$

The product of  $S_{fit}(\lambda)$  and  $C_{guess}(t)$  yields  $\Delta A_{fit}(\lambda, t)$  (equation S6), subsequently, minimizing residuals  $[\Delta A_{exp}(\lambda, t) - \Delta A_{fit}(\lambda, t)]$ , optimal  $S_{fit}(\lambda)$  and time constants were obtained.<sup>3</sup>

$$\Delta A_{fit}(\lambda, t) = S \cdot C = A \cdot C^+ \cdot C \quad (S4)$$

The study by van Stokkum and coworkers<sup>1</sup> has provided a more comprehensive understanding of the mathematical and technological components of globally analyzing transient absorption spectra.

We did not blindly rely on software-generated data. Rather, to check the reliability of the components obtained from the global analyses, we re-used the globally obtained components to fit the single-wavelength decay traces over a wide range of wavelengths of the transient absorption spectra. Further, the average lifetimes calculated from the decay parameters probing at a particular wavelength (at 600 nm, which is the maximum of the ESA band in the wavelength range 570-700 nm, although the whole range has shown similar kinetics) show similar trends as function of crowder concentration as that obtained from global analyses. The decay kinetics at 600 nm have been shown already (Figures 5E, F and SI Figure S4, Tables S1).

## References

- 1 I. H. M. Van Stokkum, D. S. Larsen and R. Van Grondelle, *Biochim. Biophys. Acta - Bioenerg.*, 2004, **1657**, 82-104.
- 2 J. Beckwith, C. A. Rumble and E. Vauthey, *Int. Rev. Phys. Chem.*, 2020, **39**, 135-216.
- 3 R. Hamburger, C. Rumble and E. R. Young, *J. Vis. Exp.*, 2024, **204**, e65519.

## Photoreduction and oxidation of the protein

Multiple groups have documented the possibility of photoreduction and oxidation of heme iron under irradiation; however, the precise mechanism of such long-lasting photoproduct formation remains unknown.<sup>1-6</sup> While there was speculation of photo redox phenomena occurring upon exposure to UV irradiation, indicating that aromatic amino acid residues may serve as electron donors,<sup>2</sup> visible wavelength excitation have also been shown to give rise to the same effect. The axial ligands and amino acid residues in close proximity to the heme group are observed to play a vital part in this photoreduction.<sup>3-6</sup> To investigate the formation of photoproducts, we compared the ground state absorption spectrum of ferric Cyt *c* before and after 1 hour of laser irradiation, with negligible change in the spectral signature (SI Figure S16A). However, chemically reducing the same irradiated sample has confirmed the presence of the fully reduced species from the red-shifted Soret band and prominently split Q-band. Further, we overlapped the differential ground state absorption spectra of ferric and ferrous Cyt *c* and transient absorption spectra of ferric at late time delay (20 ps), considering cooling

components are absent (SI Figure S16B). From the ratio of absorbances, the yield of photo-reduced Cyt *c* was calculated as mentioned elsewhere<sup>6</sup> and found to be 0.0012 upon excitation by 400 nm laser, which is much less as compared to that reported in literature. The reason for such reduced photoreduction may lie in the fact that all transient absorption experiments with the ferric samples have been carried out under normal conditions wherein the high concentration of dissolved oxygen in phosphate buffer suppressed photoreduction.<sup>5</sup> To confirm our observation further, we carried out transient absorption experiments of ferric Cyt *c* in buffer and 200 g/L of synthetic crowders (Dextran 40, 70, Ficoll 70, and PEG 8) after purging oxygen into each sample before recording spectra. The results obtained in both ambient and aerobic conditions show appreciable overlap with each other (SI Figures S17). Similarly, while investigating the possibility of photo-oxidation of ferrous Cyt *c*, negligible changes observed in the ground state absorption spectra of ferrous form before and after laser irradiation reduce the possibility of photo-oxidation (Figure S18A), which is further confirmed by the significant differences observed in spectral nature near the Q-band and shift in Soret band upon overlapping with the ground state absorption spectra of ferric Cyt *c* before laser exposure (black line) to the ferrous one after exposure (blue line). The extremely low yield<sup>6</sup> of 0.00034 calculated by comparing transient absorption spectra of ferrous Cyt *c* at 20 ps (assuming cooling is completed at a longer time delay) and differential ground state absorption spectra of ferric and ferrous Cyt *c*, extensively justifies the least probability of photooxidation of ferrous Cyt *c* (Figure S18B).

Interestingly, the pump laser intensity has been shown to have a direct impact on the photoreduction process.<sup>5,6</sup> We conducted a power-dependent measurement of both the ferric and ferrous forms in buffer, where the  $\Delta A$  at 530 nm (ground state bleach signal) vs. increasing pump power shows non-linearity beyond 0.6-0.7 mW (SI Figure S19A and S20A), while our working pump power lies within the linear limit ( $0.5 \pm 0.03$  mW). Increased laser intensity has brought about a gradual longer decay when probed at 600 nm for ferric (SI Figure S19B), and at 575 nm for ferrous (Figure 20B), not decaying within the limited time scale of our delay stage ( $\sim 8$  ns). In addition to the four components, a tiny infinite component had to be included in order to obtain the most accurate fit when pumping beyond 0.6 mW. The magnitudes of all five decay components have been tabulated, showing that the "Inf" component stays very low ( $< 0.01\%$ ) throughout the range of 0.3-0.5 mW but steadily increases to 2% at around 1 mW for ferric and  $\sim 3\%$  at 0.8 mW of pump power for ferrous (SI Table S14, SI Table S15). Hence, it allows us to assign the "Inf" component as the photo redox

conversion timescale.<sup>1,6</sup> Since the amplitude of this photo redox conversion timescale is very low ( $\sim 0.0001$ ) and the decay time is beyond instrument limitation ( $> 8$  ns) at our working pump power, 0.5 mW, showing very little possibility of photoreduction or photooxidation of the species, we have carefully excluded this component from our discussion.

## References

- 1 C. Consani, O. Bräm, F. Van Mourik, A. Cannizzo and M. Chergui, *Chem. Phys.*, 2012, **396**, 108-115.
- 2 T. Masuda, A. Minemura, K. Yamauchi and M. Kondo, *J. Radiat. Res.*, 1980, **21**, 149.
- 3 W. P. Vorkink and M. A. Cusanovich, *Photochem. Photobiol.*, 1973, **19**, 205.
- 4 C. Bartocci, A. Maldotti and O. Traverso, *Inorg. Chim. Acta*, 1985, **107**, 5.
- 5 Y. Gu, P. Li, J. T. Sage and P. M. Champion, *J. Am. Chem. Soc.*, 1993, **115**, 4993.
- 6 D. Lowenich, K. Kleinermanns, V. Karunakaran and S. A. Kovalenko, *Photochem. Photobiol.*, 2008, **84**, 193.

**Table S1:** Fitting parameters obtained from decay kinetics of ferric Cyt *c*, being probed at 600 nm, in the presence of crowders as a function of their increasing concentration (Independent experiments with ~ 10 % error).

| <b>PEG 8</b> | <b>a<sub>1</sub></b> | <b>τ<sub>1</sub> (ps)</b> | <b>a<sub>2</sub></b> | <b>τ<sub>2</sub> (ps)</b> | <b>a<sub>3</sub></b> | <b>τ<sub>3</sub> (ps)</b> | <b>a<sub>4</sub></b> | <b>τ<sub>4</sub> (ps)</b> |
|--------------|----------------------|---------------------------|----------------------|---------------------------|----------------------|---------------------------|----------------------|---------------------------|
| 0            | 0.510                | 0.120                     | 0.0700               | 0.350                     | 0.250                | 3.65                      | 0.170                | 6.22                      |
| 50           | 0.510                | 0.130                     | 0.0600               | 0.910                     | 0.340                | 4.35                      | 0.0800               | 385                       |
| 100          | 0.520                | 0.140                     | 0.0800               | 0.810                     | 0.350                | 5.29                      | 0.0500               | 650.                      |
| 150          | 0.500                | 0.140                     | 0.0550               | 0.850                     | 0.400                | 4.21                      | 0.0450               | 820.                      |
| 200          | 0.480                | 0.150                     | 0.0100               | 0.950                     | 0.460                | 2.82                      | 0.0400               | 901                       |

| <b>Dextran 40</b> | <b>a<sub>1</sub></b> | <b>τ<sub>1</sub> (ps)</b> | <b>a<sub>2</sub></b> | <b>τ<sub>2</sub> (ps)</b> | <b>a<sub>3</sub></b> | <b>τ<sub>3</sub> (ps)</b> | <b>a<sub>4</sub></b> | <b>τ<sub>4</sub> (ps)</b> |
|-------------------|----------------------|---------------------------|----------------------|---------------------------|----------------------|---------------------------|----------------------|---------------------------|
| 0                 | 0.510                | 0.120                     | 0.0700               | 0.350                     | 0.250                | 3.65                      | 0.170                | 6.22                      |
| 50                | 0.440                | 0.110                     | 0.0500               | 0.440                     | 0.440                | 3.70                      | 0.0700               | 16.0                      |
| 100               | 0.440                | 0.110                     | 0.0500               | 0.530                     | 0.470                | 4.30                      | 0.0400               | 21.0                      |
| 150               | 0.400                | 0.150                     | 0.0300               | 0.550                     | 0.550                | 5.20                      | 0.0200               | 53.0                      |
| 200               | 0.400                | 0.150                     | 0.0200               | 1.30                      | 0.570                | 5.34                      | 0.0100               | 93.0                      |

| <b>Ficoll 70</b> | <b>a<sub>1</sub></b> | <b>τ<sub>1</sub> (ps)</b> | <b>a<sub>2</sub></b> | <b>τ<sub>2</sub> (ps)</b> | <b>a<sub>3</sub></b> | <b>τ<sub>3</sub> (ps)</b> | <b>a<sub>4</sub></b> | <b>τ<sub>4</sub> (ps)</b> |
|------------------|----------------------|---------------------------|----------------------|---------------------------|----------------------|---------------------------|----------------------|---------------------------|
| 0                | 0.510                | 0.120                     | 0.0700               | 0.350                     | 0.250                | 3.65                      | 0.170                | 6.22                      |
| 50               | 0.520                | 0.130                     | 0.0700               | 0.320                     | 0.320                | 5.40                      | 0.0800               | 49.0                      |
| 100              | 0.480                | 0.130                     | 0.0700               | 0.620                     | 0.410                | 5.50                      | 0.0400               | 86.0                      |
| 150              | 0.470                | 0.150                     | 0.0500               | 1.50                      | 0.450                | 5.21                      | 0.0300               | 127                       |
| 200              | 0.450                | 0.130                     | 0.0600               | 0.880                     | 0.440                | 3.70                      | 0.0500               | 36.0                      |

| <b>Dextran 70</b> | <b>a<sub>1</sub></b> | <b>τ<sub>1</sub> (ps)</b> | <b>a<sub>2</sub></b> | <b>τ<sub>2</sub> (ps)</b> | <b>a<sub>3</sub></b> | <b>τ<sub>3</sub> (ps)</b> | <b>a<sub>4</sub></b> | <b>τ<sub>4</sub> (ps)</b> |
|-------------------|----------------------|---------------------------|----------------------|---------------------------|----------------------|---------------------------|----------------------|---------------------------|
| 0                 | 0.510                | 0.120                     | 0.0700               | 0.350                     | 0.250                | 3.65                      | 0.170                | 6.22                      |
| 50                | 0.490                | 0.120                     | 0.0900               | 0.750                     | 0.310                | 4.64                      | 0.110                | 10.0                      |
| 100               | 0.510                | 0.140                     | 0.0300               | 0.800                     | 0.360                | 4.61                      | 0.100                | 13.5                      |
| 150               | 0.520                | 0.140                     | 0.0200               | 0.850                     | 0.390                | 5.65                      | 0.0700               | 51.0                      |
| 200               | 0.500                | 0.150                     | 0.0500               | 0.950                     | 0.340                | 3.95                      | 0.110                | 25.0                      |

| <b>BSA</b> | <b>a<sub>1</sub></b> | <b>τ<sub>1</sub> (ps)</b> | <b>a<sub>2</sub></b> | <b>τ<sub>2</sub> (ps)</b> | <b>a<sub>3</sub></b> | <b>τ<sub>3</sub> (ps)</b> | <b>a<sub>4</sub></b> | <b>τ<sub>4</sub> (ps)</b> |
|------------|----------------------|---------------------------|----------------------|---------------------------|----------------------|---------------------------|----------------------|---------------------------|
| 0          | 0.510                | 0.120                     | 0.0700               | 0.350                     | 0.250                | 3.65                      | 0.170                | 6.22                      |
| 25         | 0.440                | 0.150                     | 0.300                | 2.90                      | 0.160                | 11.3                      | 0.100                | 220.                      |
| 50         | 0.220                | 0.230                     | 0.530                | 1.45                      | 0.180                | 15.0                      | 0.0900               | 350.                      |
| 75         | 0.240                | 0.350                     | 0.490                | 3.34                      | 0.190                | 22.3                      | 0.0600               | 725                       |
| 100        | 0.270                | 0.500                     | 0.470                | 3.73                      | 0.200                | 49.9                      | 0.0600               | 968                       |
| 125        | 0.280                | 0.150                     | 0.290                | 1.02                      | 0.340                | 5.14                      | 0.0900               | 125                       |
| 150        | 0.390                | 0.130                     | 0.200                | 1.11                      | 0.300                | 4.48                      | 0.110                | 49.0                      |

| <b>β-LG</b> | <b>a<sub>1</sub></b> | <b>τ<sub>1</sub> (ps)</b> | <b>a<sub>2</sub></b> | <b>τ<sub>2</sub> (ps)</b> | <b>a<sub>3</sub></b> | <b>τ<sub>3</sub> (ps)</b> | <b>a<sub>4</sub></b> | <b>τ<sub>4</sub> (ps)</b> |
|-------------|----------------------|---------------------------|----------------------|---------------------------|----------------------|---------------------------|----------------------|---------------------------|
| 0           | 0.510                | 0.120                     | 0.0700               | 0.350                     | 0.250                | 3.65                      | 0.170                | 6.22                      |
| 25          | 0.490                | 0.120                     | 0.230                | 0.380                     | 0.160                | 2.90                      | 0.130                | 108                       |
| 50          | 0.480                | 0.130                     | 0.270                | 0.420                     | 0.180                | 3.23                      | 0.120                | 130.                      |
| 75          | 0.490                | 0.150                     | 0.240                | 0.480                     | 0.190                | 3.16                      | 0.0800               | 190.                      |
| 100         | 0.470                | 0.180                     | 0.270                | 0.560                     | 0.200                | 3.73                      | 0.0600               | 360.                      |
| 125         | 0.320                | 0.150                     | 0.290                | 0.440                     | 0.310                | 4.08                      | 0.0800               | 96.0                      |
| 150         | 0.440                | 0.140                     | 0.360                | 0.390                     | 0.300                | 4.12                      | 0.100                | 65.0                      |

| <b>[Glucose]<br/>(g/L)</b> | <b>a<sub>1</sub></b> | <b>τ<sub>1</sub> (ps)</b> | <b>a<sub>2</sub></b> | <b>τ<sub>2</sub> (ps)</b> | <b>a<sub>3</sub></b> | <b>τ<sub>3</sub> (ps)</b> | <b>a<sub>4</sub></b> | <b>τ<sub>4</sub> (ps)</b> |
|----------------------------|----------------------|---------------------------|----------------------|---------------------------|----------------------|---------------------------|----------------------|---------------------------|
| <b>0</b>                   | 0.510                | 0.120                     | 0.0700               | 0.350                     | 0.250                | 3.65                      | 0.170                | 6.22                      |
| <b>50</b>                  | 0.500                | 0.130                     | 0.0600               | 0.400                     | 0.280                | 4.10                      | 0.160                | 8.50                      |
| <b>100</b>                 | 0.490                | 0.150                     | 0.0600               | 0.460                     | 0.310                | 3.70                      | 0.140                | 13.0                      |
| <b>150</b>                 | 0.500                | 0.140                     | 0.0500               | 0.570                     | 0.360                | 3.90                      | 0.0900               | 81.0                      |
| <b>200</b>                 | 0.480                | 0.130                     | 0.0500               | 0.610                     | 0.410                | 3.50                      | 0.0600               | 137                       |

| <b>[Sucrose]<br/>(g/L)</b> | <b>a<sub>1</sub></b> | <b>τ<sub>1</sub> (ps)</b> | <b>a<sub>2</sub></b> | <b>τ<sub>2</sub> (ps)</b> | <b>a<sub>3</sub></b> | <b>τ<sub>3</sub> (ps)</b> | <b>a<sub>4</sub></b> | <b>τ<sub>4</sub> (ps)</b> |
|----------------------------|----------------------|---------------------------|----------------------|---------------------------|----------------------|---------------------------|----------------------|---------------------------|
| <b>0</b>                   | 0.510                | 0.120                     | 0.0700               | 0.350                     | 0.250                | 3.65                      | 0.170                | 6.22                      |
| <b>50</b>                  | 0.500                | 0.140                     | 0.0600               | 0.470                     | 0.290                | 2.80                      | 0.150                | 10.0                      |
| <b>100</b>                 | 0.510                | 0.130                     | 0.0600               | 0.500                     | 0.300                | 3.30                      | 0.130                | 18.0                      |
| <b>150</b>                 | 0.520                | 0.150                     | 0.0700               | 0.310                     | 0.270                | 3.10                      | 0.140                | 14.0                      |
| <b>200</b>                 | 0.510                | 0.120                     | 0.0800               | 0.250                     | 0.260                | 2.90                      | 0.150                | 11.0                      |

| <b>[Ethylene<br/>Glycol]<br/>(g/L)</b> | <b>a<sub>1</sub></b> | <b>τ<sub>1</sub> (ps)</b> | <b>a<sub>2</sub></b> | <b>τ<sub>2</sub> (ps)</b> | <b>a<sub>3</sub></b> | <b>τ<sub>3</sub> (ps)</b> | <b>a<sub>4</sub></b> | <b>τ<sub>4</sub> (ps)</b> |
|----------------------------------------|----------------------|---------------------------|----------------------|---------------------------|----------------------|---------------------------|----------------------|---------------------------|
| <b>0</b>                               | 0.510                | 0.120                     | 0.0700               | 0.350                     | 0.250                | 3.65                      | 0.170                | 6.22                      |
| <b>50</b>                              | 0.510                | 0.130                     | 0.0700               | 0.370                     | 0.270                | 3.50                      | 0.150                | 9.00                      |
| <b>100</b>                             | 0.500                | 0.120                     | 0.0600               | 0.420                     | 0.310                | 3.70                      | 0.130                | 15.0                      |
| <b>150</b>                             | 0.490                | 0.150                     | 0.0600               | 0.490                     | 0.330                | 3.60                      | 0.120                | 18.0                      |
| <b>200</b>                             | 0.480                | 0.170                     | 0.0500               | 0.540                     | 0.370                | 4.10                      | 0.100                | 23.0                      |

**Table S2:** The principal components obtained from singular value decomposition (SVD) of the transient absorption data for ferric Cyt *c* in buffer and in the presence of synthetic polymeric crowders (Independent experiments with ~ 10 % error).

| <b>Crowder</b><br>(g/L) | <b>Dextran 40</b> |               |               |               | <b>PEG 8</b>  |               |               |               |
|-------------------------|-------------------|---------------|---------------|---------------|---------------|---------------|---------------|---------------|
|                         | $\tau_1$ (ps)     | $\tau_2$ (ps) | $\tau_3$ (ps) | $\tau_4$ (ps) | $\tau_1$ (ps) | $\tau_2$ (ps) | $\tau_3$ (ps) | $\tau_4$ (ps) |
| <b>0</b>                | 0.120±0.010       | 0.330±0.110   | 5.00±1.25     | 9.18±1.01     | 0.120±0.010   | 0.330±0.110   | 5.00±1.25     | 9.18±1.01     |
| <b>50</b>               | 0.130±0.020       | 0.500±0.200   | 5.50±1.22     | 20.0±1.00     | 0.130±0.020   | 0.560±0.310   | 6.67±1.37     | 400.±1.2      |
| <b>100</b>              | 0.170±0.030       | 0.670±0.130   | 5.00±1.21     | 25.0±1.00     | 0.160±0.030   | 0.830±0.410   | 8.50±1.14     | 622±6.5       |
| <b>150</b>              | 0.180±0.040       | 1.00±0.03     | 5.00±1.25     | 66.6±1.0      | 0.180±0.040   | 1.00±0.36     | 3.80±0.93     | 800.±9.7      |
| <b>200</b>              | 0.220±0.060       | 1.61±0.27     | 4.64±1.08     | 95.9±2.3      | 0.200±0.050   | 2.10±0.50     | 5.00±1.02     | 1000±11       |



| <b>Crowder</b> | <b>Dextran 70</b> |                                 |                                 |                                 | <b>Ficoll 70</b>                |                                 |                                 |                                 |
|----------------|-------------------|---------------------------------|---------------------------------|---------------------------------|---------------------------------|---------------------------------|---------------------------------|---------------------------------|
|                | <b>(g/L)</b>      | <b><math>\tau_1</math> (ps)</b> | <b><math>\tau_2</math> (ps)</b> | <b><math>\tau_3</math> (ps)</b> | <b><math>\tau_4</math> (ps)</b> | <b><math>\tau_1</math> (ps)</b> | <b><math>\tau_2</math> (ps)</b> | <b><math>\tau_3</math> (ps)</b> |
| <b>0</b>       | 0.120±0.010       | 0.330±0.110                     | 5.00±1.30                       | 9.18±1.01                       | 0.120±0.010                     | 0.330±0.110                     | 5.00±1.25                       | 9.18±1.01                       |
| <b>50</b>      | 0.120±0.010       | 0.667±0.130                     | 3.08±0.25                       | 10.6±1.2                        | 0.150±0.020                     | 0.690±0.100                     | 4.42±0.73                       | 69.4±1.3                        |
| <b>100</b>     | 0.130±0.020       | 0.830±0.420                     | 2.73±0.38                       | 14.4±3.7                        | 0.180±0.050                     | 0.960±0.270                     | 4.47±0.83                       | 100.±1.0                        |
| <b>150</b>     | 0.150±0.030       | 0.840±0.400                     | 3.70±0.27                       | 46.5±1.4                        | 0.190±0.060                     | 1.12±0.33                       | 4.60±0.56                       | 111±1.0                         |
| <b>200</b>     | 0.130±0.040       | 0.680±0.230                     | 3.73±0.51                       | 20.0±1.0                        | 0.110±0.060                     | 0.550±0.400                     | 3.78±0.23                       | 46.7±1.4                        |

**Table S3:** The principal components obtained from singular value decomposition (SVD) of the transient absorption data for ferrous Cyt *c* in buffer and in the presence of synthetic polymeric crowders (Independent experiments with ~ 10 % error).

| <b>Crowder</b><br><br>(g/L) | <b>Dextran 40</b> |               |               |               | <b>PEG 8</b>  |               |               |               |
|-----------------------------|-------------------|---------------|---------------|---------------|---------------|---------------|---------------|---------------|
|                             | $\tau_1$ (ps)     | $\tau_2$ (ps) | $\tau_3$ (ps) | $\tau_4$ (ps) | $\tau_1$ (ps) | $\tau_2$ (ps) | $\tau_3$ (ps) | $\tau_4$ (ps) |
| <b>0</b>                    | 0.220±0.410       | 0.560±0.070   | 2.77±0.16     | 7.20±1.06     | 0.220±0.410   | 0.560±0.070   | 2.77±0.16     | 7.20±1.06     |
| <b>50</b>                   | 0.250±0.080       | 0.910±0.070   | 3.64±0.37     | 8.88±1.14     | 0.260±0.090   | 1.01±0.11     | 4.16±0.10     | 12.4±0.6      |
| <b>100</b>                  | 0.270±0.100       | 1.40±0.09     | 4.60±0.56     | 12.6±1.1      | 0.260±0.090   | 0.720±0.140   | 4.27±0.82     | 14.6±1.1      |
| <b>150</b>                  | 0.290±0.130       | 1.48±0.14     | 5.31±0.67     | 13.2±1.1      | 0.290±0.050   | 0.690±0.130   | 3.96±0.78     | 22.7±0.6      |
| <b>200</b>                  | 0.310±0.140       | 1.54±0.29     | 5.03±0.59     | 14.7±1.1      | 0.280±0.120   | 0.650±0.130   | 4.79±0.77     | 24.2±1.1      |

| <b>Crowder</b><br><br><b>(g/L)</b> | <b>Dextran 70</b> |               |               |               | <b>Ficoll 70</b> |               |               |               |
|------------------------------------|-------------------|---------------|---------------|---------------|------------------|---------------|---------------|---------------|
|                                    | $\tau_1$ (ps)     | $\tau_2$ (ps) | $\tau_3$ (ps) | $\tau_4$ (ps) | $\tau_1$ (ps)    | $\tau_2$ (ps) | $\tau_3$ (ps) | $\tau_4$ (ps) |
| <b>0</b>                           | 0.220±0.410       | 0.560±0.070   | 2.77±0.16     | 7.20±1.06     | 0.220±0.410      | 0.560±0.070   | 2.77±0.16     | 7.20±1.06     |
| <b>50</b>                          | 0.230±0.050       | 0.650±0.070   | 3.84±0.36     | 13.7±0.6      | 0.210±0.060      | 0.790±0.080   | 3.04±0.53     | 8.90±0.91     |
| <b>100</b>                         | 0.250±0.080       | 0.950±0.130   | 4.19±0.71     | 20.6±0.5      | 0.260±0.090      | 1.80±0.33     | 4.47±0.33     | 10.1±1.1      |
| <b>150</b>                         | 0.260±0.050       | 0.640±0.320   | 4.32±0.53     | 24.7±1.1      | 0.150±0.090      | 0.300±0.130   | 1.35±0.26     | 5.41±1.4      |
| <b>200</b>                         | 0.260±0.060       | 0.530±0.260   | 4.20±0.51     | 20.2±1.1      | 0.180±0.040      | 0.280±0.110   | 1.15±0.76     | 5.11±1.6      |

**Table S4:** Variation in the blue shift of ESA band ~ 575- 600 nm with time delay and comparison of the amplitudes of cooling components calculated both from the spectra and fitting parameters of decay kinetics at corresponding maxima, 600 and 575 nm of ferric and ferrous Cyt *c* respectively in buffer and presence of synthetic crowders.

[In the second column (shift in  $\lambda$ ), we have tabulated the extent of the blue shift in wavelength of the ESA band with an increasing time delay of both ferric and ferrous forms in buffer and in the presence of crowders as a function of their concentration, the third column (Time delay) represents the time delay till which blue shift is persistent, while the third column ( $a_{cooling}$ ) compares the amplitude of cooling calculated from the transient absorption spectra with that of ' $a_1 + a_2$ ', which is the amplitude of cooling calculated from the combined amplitudes of  $\tau_1$  and  $\tau_2$  obtained from the exponential fitting of ESA maxima. ( $\Delta A_{time\ zero} = \Delta A$  at initial time delay from which ESA starts decaying,  $\Delta A_{no\ shift} = \Delta A$  at that time delay from which the blue shift and narrowing of the band are ended).]

| PEG 8<br>(g/L) | Ferric<br>Shift in $\lambda$<br>(nm) | Time<br>delay (ps) | $a_{cooling} =$                                          |                          | Ferrous<br>Shift in $\lambda$<br>(nm) | Time<br>delay (ps) | $a_{cooling} =$                                          |                          |
|----------------|--------------------------------------|--------------------|----------------------------------------------------------|--------------------------|---------------------------------------|--------------------|----------------------------------------------------------|--------------------------|
|                |                                      |                    | $1 - \frac{\Delta A_{no\ shift}}{\Delta A_{time\ zero}}$ | $a_1 + a_2$ at<br>600 nm |                                       |                    | $1 - \frac{\Delta A_{no\ shift}}{\Delta A_{time\ zero}}$ | $a_1 + a_2$ at<br>575 nm |
| 0              | 12.0                                 | 5.00               | 0.600                                                    | 0.580                    | 5.0                                   | 6.00               | 0.570                                                    | 0.570                    |
| 50             | 15.0                                 | 10.0               | 0.570                                                    | 0.570                    | 15.0                                  | 6.00               | 0.620                                                    | 0.600                    |
| 100            | 17.0                                 | 10.0               | 0.580                                                    | 0.600                    | 18.0                                  | 7.00               | 0.570                                                    | 0.570                    |
| 150            | 22.0                                 | 10.0               | 0.546                                                    | 0.550                    | 13.0                                  | 7.00               | 0.590                                                    | 0.580                    |
| 200            | 19.0                                 | 10.0               | 0.500                                                    | 0.490                    | 17.0                                  | 6.00               | 0.560                                                    | 0.550                    |

| Dextran 40<br>(g/L) | Ferric<br>Shift in $\lambda$<br>(nm) | Time<br>delay (ps) | $a_{cooling} =$                                          |                          | Ferrous<br>Shift in $\lambda$<br>(nm) | Time<br>delay (ps) | $a_{cooling} =$                                          |                          |
|---------------------|--------------------------------------|--------------------|----------------------------------------------------------|--------------------------|---------------------------------------|--------------------|----------------------------------------------------------|--------------------------|
|                     |                                      |                    | $1 - \frac{\Delta A_{no\ shift}}{\Delta A_{time\ zero}}$ | $a_1 + a_2$ at<br>600 nm |                                       |                    | $1 - \frac{\Delta A_{no\ shift}}{\Delta A_{time\ zero}}$ | $a_1 + a_2$ at<br>575 nm |
| 0                   | 12.0                                 | 5.00               | 0.600                                                    | 0.580                    | 5.00                                  | 6.00               | 0.570                                                    | 0.570                    |
| 50                  | 11.0                                 | 6.00               | 0.496                                                    | 0.490                    | 15.0                                  | 6.00               | 0.575                                                    | 0.590                    |
| 100                 | 10.0                                 | 7.00               | 0.496                                                    | 0.490                    | 7.0                                   | 7.00               | 0.610                                                    | 0.600                    |
| 150                 | 9.00                                 | 7.00               | 0.433                                                    | 0.430                    | 9.00                                  | 5.00               | 0.585                                                    | 0.590                    |
| 200                 | 10.0                                 | 7.00               | 0.440                                                    | 0.420                    | 9.00                                  | 6.00               | 0.533                                                    | 0.540                    |

| Ficoll 70<br>(g/L) | Ferric<br>Shift in $\lambda$<br>(nm) | Time<br>delay (ps) | $a_{cooling} =$                                          |                          | Ferrous<br>Shift in $\lambda$<br>(nm) | Time<br>delay (ps) | $a_{cooling} =$                                          |                          |
|--------------------|--------------------------------------|--------------------|----------------------------------------------------------|--------------------------|---------------------------------------|--------------------|----------------------------------------------------------|--------------------------|
|                    |                                      |                    | $1 - \frac{\Delta A_{no\ shift}}{\Delta A_{time\ zero}}$ | $a_1 + a_2$ at<br>600 nm |                                       |                    | $1 - \frac{\Delta A_{no\ shift}}{\Delta A_{time\ zero}}$ | $a_1 + a_2$ at<br>575 nm |
| <b>0</b>           | 12.0                                 | 5.00               | 0.600                                                    | 0.580                    | 5.00                                  | 6.00               | 0.570                                                    | 0.570                    |
| <b>50</b>          | 25.0                                 | 4.00               | 0.610                                                    | 0.590                    | 11.0                                  | 8.00               | 0.616                                                    | 0.620                    |
| <b>100</b>         | 18.0                                 | 6.00               | 0.570                                                    | 0.550                    | 13.0                                  | 6.00               | 0.610                                                    | 0.620                    |
| <b>150</b>         | 18.0                                 | 7.00               | 0.530                                                    | 0.520                    | 9.00                                  | 8.00               | 0.600                                                    | 0.630                    |
| <b>200</b>         | 15.0                                 | 5.00               | 0.500                                                    | 0.510                    | 10.0                                  | 9.00               | 0.610                                                    | 0.630                    |

| Dextran 70<br>(g/L) | Ferric<br>Shift in $\lambda$<br>(nm) | Time<br>delay (ps) | $a_{cooling} =$                                          |                          | Ferrous<br>Shift in $\lambda$<br>(nm) | Time<br>delay (ps) | $a_{cooling} =$                                          |                          |
|---------------------|--------------------------------------|--------------------|----------------------------------------------------------|--------------------------|---------------------------------------|--------------------|----------------------------------------------------------|--------------------------|
|                     |                                      |                    | $1 - \frac{\Delta A_{no\ shift}}{\Delta A_{time\ zero}}$ | $a_1 + a_2$ at<br>600 nm |                                       |                    | $1 - \frac{\Delta A_{no\ shift}}{\Delta A_{time\ zero}}$ | $a_1 + a_2$ at<br>575 nm |
| <b>0</b>            | 12.0                                 | 5.00               | 0.600                                                    | 0.580                    | 5.00                                  | 6.00               | 0.570                                                    | 0.570                    |
| <b>50</b>           | 18.0                                 | 5.00               | 0.590                                                    | 0.580                    | 22.0                                  | 6.00               | 0.570                                                    | 0.580                    |
| <b>100</b>          | 20.0                                 | 5.00               | 0.550                                                    | 0.540                    | 18.0                                  | 7.00               | 0.530                                                    | 0.520                    |
| <b>150</b>          | 26.0                                 | 5.00               | 0.570                                                    | 0.540                    | 18.0                                  | 6.00               | 0.480                                                    | 0.490                    |
| <b>200</b>          | 18.0                                 | 5.00               | 0.560                                                    | 0.550                    | 23.0                                  | 6.50               | 0.525                                                    | 0.510                    |

**Table S5:** Fitting parameters obtained from decay kinetics of ferric Cyt *c*, being probed at 550 nm, in the presence of crowders as a function of their increasing concentration (Independent experiments with ~ 10 % error).

| [Ficoll 70]<br>(g/L) | (-) $a_1$ | $\tau_1$ (ps) | (-) $a_2$ | $\tau_2$ (ps) | (-) $a_3$ | $\tau_3$ (ps) | (-) $a_4$ | $\tau_4$ (ps) |
|----------------------|-----------|---------------|-----------|---------------|-----------|---------------|-----------|---------------|
| <b>0</b>             | 0.490     | 0.120         | 0.0500    | 0.510         | 0.320     | 3.22          | 0.140     | 7.18          |
| <b>50</b>            | 0.500     | 0.120         | 0.0600    | 0.350         | 0.370     | 6.77          | 0.0700    | 44.0          |
| <b>100</b>           | 0.500     | 0.130         | 0.0700    | 0.490         | 0.390     | 6.86          | 0.0400    | 76.0          |
| <b>150</b>           | 0.480     | 0.140         | 0.0500    | 0.780         | 0.450     | 6.96          | 0.0300    | 115           |
| <b>200</b>           | 0.450     | 0.140         | 0.0600    | 0.730         | 0.440     | 4.04          | 0.0500    | 31.0          |

**Table S6:** Fitting parameters obtained from decay kinetics of ferric Cyt *c*, being probed at 435 nm, in the presence of crowders as a function of their increasing concentration (Independent experiments with ~ 10 % error).

| [ PEG 8 ]<br>(g/L) | $a_1$ | $\tau_1$ (ps) | $a_2$  | $\tau_2$ (ps) | $a_3$ | $\tau_3$ (ps) |
|--------------------|-------|---------------|--------|---------------|-------|---------------|
| <b>0</b>           | 0.520 | 0.150         | 0.270  | 0.360         | 0.210 | 3.50          |
| <b>50</b>          | 0.410 | 0.160         | 0.150  | 0.510         | 0.440 | 80.0          |
| <b>100</b>         | 0.410 | 0.140         | 0.130  | 0.660         | 0.460 | 92.0          |
| <b>150</b>         | 0.360 | 0.150         | 0.140  | 0.750         | 0.490 | 97.0          |
| <b>200</b>         | 0.410 | 0.170         | 0.0800 | 0.830         | 0.510 | 105           |

| [Dextran<br>40] (g/L) | $a_1$ | $\tau_1$ (ps) | $a_2$ | $\tau_2$ (ps) | $a_3$ | $\tau_3$ (ps) |
|-----------------------|-------|---------------|-------|---------------|-------|---------------|
| <b>0</b>              | 0.520 | 0.150         | 0.270 | 0.360         | 0.210 | 3.50          |
| <b>50</b>             | 0.450 | 0.150         | 0.250 | 0.360         | 0.200 | 3.98          |

|            |       |       |        |       |       |      |
|------------|-------|-------|--------|-------|-------|------|
| <b>100</b> | 0.460 | 0.150 | 0.150  | 0.390 | 0.390 | 4.22 |
| <b>150</b> | 0.380 | 0.150 | 0.100  | 0.440 | 0.520 | 4.86 |
| <b>200</b> | 0.350 | 0.140 | 0.0700 | 0.790 | 0.580 | 5.29 |

| <b>[Ficoll 70]<br/>(g/L)</b> | <b>a<sub>1</sub></b> | <b>τ<sub>1</sub> (ps)</b> | <b>a<sub>2</sub></b> | <b>τ<sub>2</sub> (ps)</b> | <b>a<sub>3</sub></b> | <b>τ<sub>3</sub> (ps)</b> |
|------------------------------|----------------------|---------------------------|----------------------|---------------------------|----------------------|---------------------------|
| <b>0</b>                     | 0.520                | 0.150                     | 0.270                | 0.360                     | 0.210                | 3.50                      |
| <b>50</b>                    | 0.410                | 0.140                     | 0.150                | 0.450                     | 0.440                | 12.0                      |
| <b>100</b>                   | 0.410                | 0.130                     | 0.130                | 0.750                     | 0.460                | 15.0                      |
| <b>150</b>                   | 0.360                | 0.150                     | 0.140                | 0.900                     | 0.490                | 16.0                      |
| <b>200</b>                   | 0.420                | 0.140                     | 0.0800               | 0.600                     | 0.500                | 7.30                      |

| <b>[Dextran<br/>70] (g/L)</b> | <b>a<sub>1</sub></b> | <b>τ<sub>1</sub> (ps)</b> | <b>a<sub>2</sub></b> | <b>τ<sub>2</sub> (ps)</b> | <b>a<sub>3</sub></b> | <b>τ<sub>3</sub> (ps)</b> |
|-------------------------------|----------------------|---------------------------|----------------------|---------------------------|----------------------|---------------------------|
| <b>0</b>                      | 0.520                | 0.150                     | 0.270                | 0.360                     | 0.210                | 3.50                      |
| <b>50</b>                     | 0.410                | 0.130                     | 0.180                | 0.500                     | 0.410                | 6.50                      |
| <b>100</b>                    | 0.410                | 0.140                     | 0.130                | 0.710                     | 0.460                | 7.80                      |
| <b>150</b>                    | 0.350                | 0.150                     | 0.190                | 0.870                     | 0.460                | 13.0                      |
| <b>200</b>                    | 0.460                | 0.120                     | 0.0900               | 0.910                     | 0.450                | 10.0                      |

| <b>[BSA]<br/>(g/L)</b> | <b>a<sub>1</sub></b> | <b>τ<sub>1</sub> (ps)</b> | <b>a<sub>2</sub></b> | <b>τ<sub>2</sub> (ps)</b> | <b>a<sub>3</sub></b> | <b>τ<sub>3</sub> (ps)</b> |
|------------------------|----------------------|---------------------------|----------------------|---------------------------|----------------------|---------------------------|
| <b>0</b>               | 0.520                | 0.150                     | 0.270                | 0.360                     | 0.210                | 3.50                      |
| <b>25</b>              | 0.450                | 0.180                     | 0.280                | 1.50                      | 0.290                | 92.0                      |

|            |       |       |       |      |       |      |
|------------|-------|-------|-------|------|-------|------|
| <b>50</b>  | 0.430 | 0.250 | 0.240 | 2.10 | 0.310 | 129  |
| <b>75</b>  | 0.430 | 0.310 | 0.240 | 2.90 | 0.330 | 200. |
| <b>100</b> | 0.400 | 0.420 | 0.240 | 3.40 | 0.360 | 275  |
| <b>125</b> | 0.390 | 0.230 | 0.190 | 1.30 | 0.420 | 50.0 |
| <b>150</b> | 0.400 | 0.160 | 0.160 | 1.00 | 0.440 | 17.0 |

| <b>[<math>\beta</math>-LG]<br/>(g/L)</b> | <b><math>a_1</math></b> | <b><math>\tau_1</math> (ps)</b> | <b><math>a_2</math></b> | <b><math>\tau_2</math> (ps)</b> | <b><math>a_3</math></b> | <b><math>\tau_3</math> (ps)</b> |
|------------------------------------------|-------------------------|---------------------------------|-------------------------|---------------------------------|-------------------------|---------------------------------|
| <b>0</b>                                 | 0.520                   | 0.150                           | 0.270                   | 0.360                           | 0.210                   | 3.50                            |
| <b>25</b>                                | 0.490                   | 0.130                           | 0.240                   | 0.320                           | 0.270                   | 50.0                            |
| <b>50</b>                                | 0.500                   | 0.140                           | 0.200                   | 0.370                           | 0.300                   | 55.0                            |
| <b>75</b>                                | 0.490                   | 0.150                           | 0.220                   | 0.430                           | 0.290                   | 61.0                            |
| <b>100</b>                               | 0.490                   | 0.130                           | 0.240                   | 0.470                           | 0.270                   | 90.0                            |
| <b>125</b>                               | 0.430                   | 0.130                           | 0.180                   | 0.330                           | 0.390                   | 25.0                            |
| <b>150</b>                               | 0.430                   | 0.120                           | 0.170                   | 0.290                           | 0.400                   | 21.0                            |

| <b>[Glucose]<br/>(g/L)</b> | <b><math>a_1</math></b> | <b><math>\tau_1</math> (ps)</b> | <b><math>a_2</math></b> | <b><math>\tau_2</math> (ps)</b> | <b><math>a_3</math></b> | <b><math>\tau_3</math> (ps)</b> |
|----------------------------|-------------------------|---------------------------------|-------------------------|---------------------------------|-------------------------|---------------------------------|
| <b>0</b>                   | 0.520                   | 0.150                           | 0.270                   | 0.360                           | 0.210                   | 3.50                            |
| <b>50</b>                  | 0.500                   | 0.160                           | 0.110                   | 0.390                           | 0.390                   | 6.10                            |
| <b>100</b>                 | 0.490                   | 0.150                           | 0.0800                  | 0.430                           | 0.430                   | 6.80                            |
| <b>150</b>                 | 0.470                   | 0.140                           | 0.0800                  | 0.490                           | 0.450                   | 20.0                            |
| <b>200</b>                 | 0.480                   | 0.130                           | 0.0500                  | 0.450                           | 0.470                   | 23.0                            |



| <b>[Sucrose]<br/>(g/L)</b> | <b>a<sub>1</sub></b> | <b>τ<sub>1</sub> (ps)</b> | <b>a<sub>2</sub></b> | <b>τ<sub>2</sub> (ps)</b> | <b>a<sub>3</sub></b> | <b>τ<sub>3</sub> (ps)</b> |
|----------------------------|----------------------|---------------------------|----------------------|---------------------------|----------------------|---------------------------|
| <b>0</b>                   | 0.520                | 0.150                     | 0.270                | 0.360                     | 0.210                | 3.50                      |
| <b>50</b>                  | 0.500                | 0.130                     | 0.190                | 0.410                     | 0.310                | 5.40                      |
| <b>100</b>                 | 0.490                | 0.130                     | 0.140                | 0.450                     | 0.370                | 7.80                      |
| <b>150</b>                 | 0.490                | 0.150                     | 0.100                | 0.340                     | 0.410                | 4.60                      |
| <b>200</b>                 | 0.500                | 0.130                     | 0.0900               | 0.290                     | 0.410                | 5.50                      |

| <b>[Ethylene<br/>Glycol]<br/>(g/L)</b> | <b>a<sub>1</sub></b> | <b>τ<sub>1</sub> (ps)</b> | <b>a<sub>2</sub></b> | <b>τ<sub>2</sub> (ps)</b> | <b>a<sub>3</sub></b> | <b>τ<sub>3</sub> (ps)</b> |
|----------------------------------------|----------------------|---------------------------|----------------------|---------------------------|----------------------|---------------------------|
| <b>0</b>                               | 0.520                | 0.150                     | 0.270                | 0.360                     | 0.210                | 3.50                      |
| <b>50</b>                              | 0.500                | 0.160                     | 0.150                | 0.370                     | 0.350                | 5.40                      |
| <b>100</b>                             | 0.500                | 0.140                     | 0.110                | 0.390                     | 0.390                | 6.90                      |
| <b>150</b>                             | 0.480                | 0.170                     | 0.0900               | 0.420                     | 0.430                | 7.30                      |
| <b>200</b>                             | 0.490                | 0.180                     | 0.0500               | 0.450                     | 0.460                | 8.10                      |

**Table S7:** Fitting parameters obtained from decay kinetics of ferrous Cyt *c*, being probed at 575 nm, in the presence of crowders as a function of their increasing concentration (Independent experiments with ~ 10 % error).

| [PEG 8]<br>(g/L) | $a_1$ | $\tau_1$ (ps) | $a_2$ | $\tau_2$ (ps) | $a_3$ | $\tau_3$ (ps) | $a_4$  | $\tau_4$ (ps) |
|------------------|-------|---------------|-------|---------------|-------|---------------|--------|---------------|
| 0                | 0.470 | 0.180         | 0.100 | 0.520         | 0.230 | 2.10          | 0.200  | 7.90          |
| 50               | 0.510 | 0.230         | 0.090 | 0.870         | 0.300 | 3.90          | 0.100  | 10.6          |
| 100              | 0.520 | 0.260         | 0.050 | 0.710         | 0.340 | 4.20          | 0.0900 | 13.1          |
| 150              | 0.490 | 0.290         | 0.060 | 0.590         | 0.390 | 3.80          | 0.0600 | 19.0          |
| 200              | 0.520 | 0.270         | 0.030 | 0.510         | 0.420 | 4.55          | 0.0300 | 21.0          |

| [Dextran 40]<br>(g/L) | $a_1$ | $\tau_1$ (ps) | $a_2$  | $\tau_2$ (ps) | $a_3$ | $\tau_3$ (ps) | $a_4$  | $\tau_4$ (ps) |
|-----------------------|-------|---------------|--------|---------------|-------|---------------|--------|---------------|
| 0                     | 0.470 | 0.180         | 0.100  | 0.520         | 0.230 | 2.10          | 0.200  | 7.90          |
| 50                    | 0.500 | 0.240         | 0.0900 | 0.870         | 0.280 | 3.40          | 0.130  | 8.70          |
| 100                   | 0.500 | 0.260         | 0.100  | 1.30          | 0.300 | 4.80          | 0.100  | 11.5          |
| 150                   | 0.510 | 0.290         | 0.0800 | 1.60          | 0.320 | 5.80          | 0.090  | 14.0          |
| 200                   | 0.480 | 0.300         | 0.0600 | 1.65          | 0.390 | 4.95          | 0.0700 | 17.0          |

| [Ficoll 70]<br>(g/L) | $a_1$ | $\tau_1$ (ps) | $a_2$ | $\tau_2$ (ps) | $a_3$ | $\tau_3$ (ps) | $a_4$  | $\tau_4$ (ps) |
|----------------------|-------|---------------|-------|---------------|-------|---------------|--------|---------------|
| 0                    | 0.470 | 0.180         | 0.100 | 0.520         | 0.230 | 2.10          | 0.200  | 7.90          |
| 50                   | 0.540 | 0.230         | 0.080 | 0.780         | 0.250 | 3.00          | 0.110  | 10.5          |
| 100                  | 0.550 | 0.260         | 0.070 | 1.10          | 0.290 | 4.30          | 0.0900 | 11.8          |
| 150                  | 0.580 | 0.190         | 0.050 | 0.480         | 0.300 | 1.88          | 0.0700 | 6.00          |
| 200                  | 0.570 | 0.140         | 0.060 | 0.300         | 0.270 | 1.50          | 0.100  | 5.50          |

| <b>[Dextran 70] (g/L)</b> | <b>a<sub>1</sub></b> | <b>τ<sub>1</sub> (ps)</b> | <b>a<sub>2</sub></b> | <b>τ<sub>2</sub> (ps)</b> | <b>a<sub>3</sub></b> | <b>τ<sub>3</sub> (ps)</b> | <b>a<sub>4</sub></b> | <b>τ<sub>4</sub> (ps)</b> |
|---------------------------|----------------------|---------------------------|----------------------|---------------------------|----------------------|---------------------------|----------------------|---------------------------|
| <b>0</b>                  | 0.470                | 0.180                     | 0.100                | 0.520                     | 0.230                | 2.10                      | 0.200                | 7.90                      |
| <b>50</b>                 | 0.510                | 0.210                     | 0.070                | 0.590                     | 0.270                | 3.50                      | 0.150                | 13.7                      |
| <b>100</b>                | 0.450                | 0.240                     | 0.070                | 0.910                     | 0.370                | 4.00                      | 0.110                | 22.0                      |
| <b>150</b>                | 0.440                | 0.270                     | 0.050                | 0.610                     | 0.450                | 4.50                      | 0.0600               | 27.0                      |
| <b>200</b>                | 0.450                | 0.260                     | 0.060                | 0.450                     | 0.410                | 3.90                      | 0.0800               | 19.0                      |

| <b>[BSA] (g/L)</b> | <b>a<sub>1</sub></b> | <b>τ<sub>1</sub> (ps)</b> | <b>a<sub>2</sub></b> | <b>τ<sub>2</sub> (ps)</b> | <b>a<sub>3</sub></b> | <b>τ<sub>3</sub> (ps)</b> | <b>a<sub>4</sub></b> | <b>τ<sub>4</sub> (ps)</b> |
|--------------------|----------------------|---------------------------|----------------------|---------------------------|----------------------|---------------------------|----------------------|---------------------------|
| <b>0</b>           | 0.470                | 0.180                     | 0.100                | 0.520                     | 0.230                | 2.10                      | 0.200                | 7.90                      |
| <b>25</b>          | 0.440                | 0.210                     | 0.0900               | 0.570                     | 0.290                | 4.60                      | 0.170                | 97.0                      |
| <b>50</b>          | 0.430                | 0.240                     | 0.0900               | 0.620                     | 0.340                | 4.70                      | 0.140                | 423                       |
| <b>75</b>          | 0.410                | 0.290                     | 0.0800               | 0.670                     | 0.380                | 4.50                      | 0.130                | 495                       |
| <b>100</b>         | 0.380                | 0.330                     | 0.0900               | 0.730                     | 0.420                | 5.80                      | 0.110                | 731                       |
| <b>125</b>         | 0.400                | 0.270                     | 0.0900               | 0.520                     | 0.360                | 4.30                      | 0.150                | 302                       |
| <b>150</b>         | 0.400                | 0.220                     | 0.0900               | 0.490                     | 0.330                | 4.00                      | 0.180                | 75.0                      |

| <b>[β-LG] (g/L)</b> | <b>a<sub>1</sub></b> | <b>τ<sub>1</sub> (ps)</b> | <b>a<sub>2</sub></b> | <b>τ<sub>2</sub> (ps)</b> | <b>a<sub>3</sub></b> | <b>τ<sub>3</sub> (ps)</b> | <b>a<sub>4</sub></b> | <b>τ<sub>4</sub> (ps)</b> |
|---------------------|----------------------|---------------------------|----------------------|---------------------------|----------------------|---------------------------|----------------------|---------------------------|
| <b>0</b>            | 0.470                | 0.180                     | 0.100                | 0.520                     | 0.230                | 2.10                      | 0.200                | 7.90                      |
| <b>25</b>           | 0.440                | 0.200                     | 0.0800               | 0.560                     | 0.310                | 5.10                      | 0.170                | 25.0                      |
| <b>50</b>           | 0.430                | 0.220                     | 0.0900               | 0.600                     | 0.330                | 5.30                      | 0.150                | 77.0                      |
| <b>75</b>           | 0.420                | 0.250                     | 0.100                | 0.610                     | 0.350                | 5.40                      | 0.130                | 100.                      |
| <b>100</b>          | 0.430                | 0.300                     | 0.0900               | 0.590                     | 0.340                | 5.20                      | 0.140                | 88.0                      |
| <b>125</b>          | 0.450                | 0.280                     | 0.0900               | 0.550                     | 0.300                | 4.90                      | 0.160                | 65.0                      |
| <b>150</b>          | 0.450                | 0.240                     | 0.0900               | 0.540                     | 0.290                | 4.80                      | 0.170                | 49.0                      |

| <b>[Glucose]<br/>(g/L)</b> | <b>a<sub>1</sub></b> | <b>τ<sub>1</sub> (ps)</b> | <b>a<sub>2</sub></b> | <b>τ<sub>2</sub> (ps)</b> | <b>a<sub>3</sub></b> | <b>τ<sub>3</sub> (ps)</b> | <b>a<sub>4</sub></b> | <b>τ<sub>4</sub> (ps)</b> |
|----------------------------|----------------------|---------------------------|----------------------|---------------------------|----------------------|---------------------------|----------------------|---------------------------|
| <b>0</b>                   | 0.470                | 0.180                     | 0.100                | 0.520                     | 0.230                | 2.10                      | 0.200                | 7.90                      |
| <b>50</b>                  | 0.480                | 0.190                     | 0.0700               | 0.920                     | 0.300                | 4.50                      | 0.150                | 9.30                      |
| <b>100</b>                 | 0.500                | 0.250                     | 0.0800               | 0.730                     | 0.290                | 4.60                      | 0.130                | 11.0                      |
| <b>150</b>                 | 0.490                | 0.260                     | 0.0800               | 0.880                     | 0.320                | 5.30                      | 0.110                | 13.0                      |
| <b>200</b>                 | 0.500                | 0.280                     | 0.0600               | 0.570                     | 0.350                | 4.90                      | 0.0900               | 17.0                      |

| <b>[Sucrose] (g/L)</b> | <b>a<sub>1</sub></b> | <b>τ<sub>1</sub> (ps)</b> | <b>a<sub>2</sub></b> | <b>τ<sub>2</sub> (ps)</b> | <b>a<sub>3</sub></b> | <b>τ<sub>3</sub> (ps)</b> | <b>a<sub>4</sub></b> | <b>τ<sub>4</sub> (ps)</b> |
|------------------------|----------------------|---------------------------|----------------------|---------------------------|----------------------|---------------------------|----------------------|---------------------------|
| <b>0</b>               | 0.470                | 0.180                     | 0.100                | 0.520                     | 0.230                | 2.10                      | 0.200                | 7.90                      |
| <b>50</b>              | 0.490                | 0.250                     | 0.090                | 0.610                     | 0.250                | 3.50                      | 0.170                | 13.0                      |
| <b>100</b>             | 0.490                | 0.290                     | 0.080                | 0.770                     | 0.290                | 5.10                      | 0.140                | 24.0                      |
| <b>150</b>             | 0.480                | 0.260                     | 0.090                | 0.630                     | 0.280                | 4.20                      | 0.150                | 16.0                      |
| <b>200</b>             | 0.490                | 0.250                     | 0.100                | 0.510                     | 0.250                | 4.50                      | 0.160                | 14.0                      |

| <b>[Ethylene<br/>Glycol]<br/>(g/L)</b> | <b>a<sub>1</sub></b> | <b>τ<sub>1</sub> (ps)</b> | <b>a<sub>2</sub></b> | <b>τ<sub>2</sub> (ps)</b> | <b>a<sub>3</sub></b> | <b>τ<sub>3</sub> (ps)</b> | <b>a<sub>4</sub></b> | <b>τ<sub>4</sub> (ps)</b> |
|----------------------------------------|----------------------|---------------------------|----------------------|---------------------------|----------------------|---------------------------|----------------------|---------------------------|
| <b>0</b>                               | 0.470                | 0.180                     | 0.100                | 0.520                     | 0.230                | 2.10                      | 0.200                | 7.90                      |
| <b>50</b>                              | 0.490                | 0.240                     | 0.0900               | 0.550                     | 0.250                | 4.50                      | 0.180                | 8.50                      |
| <b>100</b>                             | 0.510                | 0.270                     | 0.0700               | 0.730                     | 0.260                | 5.30                      | 0.160                | 9.60                      |
| <b>150</b>                             | 0.510                | 0.300                     | 0.0700               | 0.820                     | 0.280                | 5.80                      | 0.140                | 11.0                      |
| <b>200</b>                             | 0.500                | 0.360                     | 0.0600               | 1.20                      | 0.320                | 3.80                      | 0.120                | 14.0                      |

**Table S8:** Fitting parameters obtained from decay kinetics of ferrous Cyt *c*, being probed at 550 nm, in the presence of crowders as a function of their increasing concentration (Independent experiments with ~ 10 % error).

| [Ficoll 70]<br>(g/L) | (-) $a_1$ | $\tau_1$ (ps) | (-) $a_2$ | $\tau_2$ (ps) | (-) $a_3$ | $\tau_3$ (ps) | (-) $a_4$ | $\tau_4$ (ps) |
|----------------------|-----------|---------------|-----------|---------------|-----------|---------------|-----------|---------------|
| <b>0</b>             | 0.480     | 0.150         | 0.110     | 0.590         | 0.220     | 2.40          | 0.190     | 8.30          |
| <b>50</b>            | 0.470     | 0.210         | 0.0500    | 0.760         | 0.370     | 3.10          | 0.0700    | 10.0          |
| <b>100</b>           | 0.460     | 0.260         | 0.0500    | 0.970         | 0.390     | 4.00          | 0.0400    | 12.0          |
| <b>150</b>           | 0.460     | 0.180         | 0.0400    | 0.430         | 0.450     | 1.98          | 0.0300    | 6.30          |
| <b>200</b>           | 0.450     | 0.150         | 0.0400    | 0.250         | 0.440     | 1.60          | 0.0500    | 5.90          |

**Table S9:** Fitting parameters obtained from decay kinetics of ferrous Cyt *c*, being probed at 430 nm, in the presence of crowders as a function of their increasing concentration (Independent experiments with ~ 10 % error).

| [PEG 8]<br>(g/L) | $a_1$ | $\tau_1$ (ps) | $a_2$  | $\tau_2$ (ps) | $a_3$ | $\tau_3$ (ps) |
|------------------|-------|---------------|--------|---------------|-------|---------------|
| <b>0</b>         | 0.480 | 0.200         | 0.120  | 0.680         | 0.400 | 4.90          |
| <b>50</b>        | 0.490 | 0.230         | 0.100  | 0.700         | 0.410 | 5.60          |
| <b>100</b>       | 0.500 | 0.270         | 0.0700 | 0.750         | 0.430 | 6.20          |
| <b>150</b>       | 0.500 | 0.290         | 0.0500 | 0.710         | 0.450 | 6.80          |
| <b>200</b>       | 0.510 | 0.310         | 0.0400 | 0.650         | 0.450 | 8.70          |

| <b>[Dextran 40]<br/>(g/L)</b> | <b>a<sub>1</sub></b> | <b>τ<sub>1</sub> (ps)</b> | <b>a<sub>2</sub></b> | <b>τ<sub>2</sub> (ps)</b> | <b>a<sub>3</sub></b> | <b>τ<sub>3</sub> (ps)</b> |
|-------------------------------|----------------------|---------------------------|----------------------|---------------------------|----------------------|---------------------------|
| <b>0</b>                      | 0.480                | 0.200                     | 0.120                | 0.680                     | 0.400                | 4.90                      |
| <b>50</b>                     | 0.490                | 0.230                     | 0.100                | 0.750                     | 0.410                | 5.00                      |
| <b>100</b>                    | 0.500                | 0.260                     | 0.100                | 1.40                      | 0.400                | 6.50                      |
| <b>150</b>                    | 0.510                | 0.270                     | 0.0800               | 1.70                      | 0.410                | 7.60                      |
| <b>200</b>                    | 0.490                | 0.290                     | 0.0800               | 1.90                      | 0.430                | 7.90                      |

| <b>[Ficoll 70]<br/>(g/L)</b> | <b>a<sub>1</sub></b> | <b>τ<sub>1</sub> (ps)</b> | <b>a<sub>2</sub></b> | <b>τ<sub>2</sub> (ps)</b> | <b>a<sub>3</sub></b> | <b>τ<sub>3</sub> (ps)</b> |
|------------------------------|----------------------|---------------------------|----------------------|---------------------------|----------------------|---------------------------|
| <b>0</b>                     | 0.480                | 0.200                     | 0.120                | 0.680                     | 0.400                | 4.90                      |
| <b>50</b>                    | 0.500                | 0.240                     | 0.140                | 0.710                     | 0.360                | 5.30                      |
| <b>100</b>                   | 0.510                | 0.250                     | 0.110                | 0.750                     | 0.380                | 6.10                      |
| <b>150</b>                   | 0.530                | 0.210                     | 0.100                | 0.780                     | 0.370                | 2.80                      |
| <b>200</b>                   | 0.550                | 0.170                     | 0.0800               | 0.800                     | 0.370                | 2.60                      |

| <b>[Dextran<br/>70] (g/L)</b> | <b>a<sub>1</sub></b> | <b>τ<sub>1</sub> (ps)</b> | <b>a<sub>2</sub></b> | <b>τ<sub>2</sub> (ps)</b> | <b>a<sub>3</sub></b> | <b>τ<sub>3</sub> (ps)</b> |
|-------------------------------|----------------------|---------------------------|----------------------|---------------------------|----------------------|---------------------------|
| <b>0</b>                      | 0.480                | 0.200                     | 0.120                | 0.680                     | 0.400                | 4.90                      |
| <b>50</b>                     | 0.490                | 0.220                     | 0.0900               | 0.730                     | 0.420                | 7.10                      |
| <b>100</b>                    | 0.490                | 0.250                     | 0.0600               | 0.790                     | 0.450                | 8.20                      |
| <b>150</b>                    | 0.470                | 0.270                     | 0.0500               | 0.850                     | 0.480                | 7.60                      |
| <b>200</b>                    | 0.450                | 0.260                     | 0.0600               | 0.630                     | 0.490                | 5.90                      |

| <b>[BSA]<br/>(g/L)</b> | <b>a<sub>1</sub></b> | <b>τ<sub>1</sub> (ps)</b> | <b>a<sub>2</sub></b> | <b>τ<sub>2</sub> (ps)</b> | <b>a<sub>3</sub></b> | <b>τ<sub>3</sub> (ps)</b> |
|------------------------|----------------------|---------------------------|----------------------|---------------------------|----------------------|---------------------------|
| <b>0</b>               | 0.480                | 0.200                     | 0.120                | 0.680                     | 0.400                | 4.90                      |
| <b>25</b>              | 0.450                | 0.230                     | 0.0900               | 0.700                     | 0.460                | 30.0                      |
| <b>50</b>              | 0.460                | 0.260                     | 0.100                | 0.750                     | 0.440                | 99.0                      |
| <b>75</b>              | 0.450                | 0.290                     | 0.0800               | 0.770                     | 0.470                | 113                       |
| <b>100</b>             | 0.470                | 0.270                     | 0.0700               | 0.810                     | 0.460                | 127                       |
| <b>125</b>             | 0.460                | 0.250                     | 0.0700               | 0.740                     | 0.470                | 72.0                      |
| <b>150</b>             | 0.430                | 0.230                     | 0.0900               | 0.640                     | 0.480                | 25.0                      |

| <b>[β-LG]<br/>(g/L)</b> | <b>a<sub>1</sub></b> | <b>τ<sub>1</sub> (ps)</b> | <b>a<sub>2</sub></b> | <b>τ<sub>2</sub> (ps)</b> | <b>a<sub>3</sub></b> | <b>τ<sub>3</sub> (ps)</b> |
|-------------------------|----------------------|---------------------------|----------------------|---------------------------|----------------------|---------------------------|
| <b>0</b>                | 0.480                | 0.200                     | 0.120                | 0.680                     | 0.400                | 4.90                      |
| <b>25</b>               | 0.440                | 0.220                     | 0.100                | 0.660                     | 0.460                | 16.0                      |
| <b>50</b>               | 0.440                | 0.240                     | 0.0900               | 0.720                     | 0.470                | 29.0                      |
| <b>75</b>               | 0.430                | 0.270                     | 0.0800               | 0.750                     | 0.490                | 35.0                      |
| <b>100</b>              | 0.460                | 0.230                     | 0.0700               | 0.690                     | 0.470                | 31.0                      |
| <b>125</b>              | 0.460                | 0.210                     | 0.0800               | 0.650                     | 0.460                | 27.0                      |
| <b>150</b>              | 0.470                | 0.180                     | 0.0700               | 0.580                     | 0.460                | 22.0                      |

| <b>[Glucose]<br/>(g/L)</b> | <b>a<sub>1</sub></b> | <b>τ<sub>1</sub> (ps)</b> | <b>a<sub>2</sub></b> | <b>τ<sub>2</sub> (ps)</b> | <b>a<sub>3</sub></b> | <b>τ<sub>3</sub> (ps)</b> |
|----------------------------|----------------------|---------------------------|----------------------|---------------------------|----------------------|---------------------------|
| <b>0</b>                   | 0.480                | 0.200                     | 0.120                | 0.680                     | 0.400                | 4.90                      |
| <b>50</b>                  | 0.480                | 0.230                     | 0.110                | 0.860                     | 0.410                | 6.10                      |
| <b>100</b>                 | 0.470                | 0.270                     | 0.110                | 0.770                     | 0.420                | 6.60                      |
| <b>150</b>                 | 0.490                | 0.290                     | 0.0800               | 0.840                     | 0.430                | 7.30                      |
| <b>200</b>                 | 0.500                | 0.320                     | 0.0600               | 0.630                     | 0.440                | 7.50                      |

| <b>[Sucrose]<br/>(g/L)</b> | <b>a<sub>1</sub></b> | <b>τ<sub>1</sub> (ps)</b> | <b>a<sub>2</sub></b> | <b>τ<sub>2</sub> (ps)</b> | <b>a<sub>3</sub></b> | <b>τ<sub>3</sub> (ps)</b> |
|----------------------------|----------------------|---------------------------|----------------------|---------------------------|----------------------|---------------------------|
| <b>0</b>                   | 0.480                | 0.200                     | 0.120                | 0.680                     | 0.400                | 4.90                      |
| <b>50</b>                  | 0.480                | 0.260                     | 0.100                | 0.760                     | 0.420                | 7.30                      |
| <b>100</b>                 | 0.490                | 0.290                     | 0.0800               | 0.890                     | 0.430                | 11.2                      |
| <b>150</b>                 | 0.500                | 0.250                     | 0.0700               | 0.740                     | 0.430                | 9.40                      |
| <b>200</b>                 | 0.500                | 0.210                     | 0.0900               | 0.690                     | 0.410                | 8.20                      |

| <b>[Ethylene<br/>Glycol]<br/>(g/L)</b> | <b>a<sub>1</sub></b> | <b>τ<sub>1</sub> (ps)</b> | <b>a<sub>2</sub></b> | <b>τ<sub>2</sub> (ps)</b> | <b>a<sub>3</sub></b> | <b>τ<sub>3</sub> (ps)</b> |
|----------------------------------------|----------------------|---------------------------|----------------------|---------------------------|----------------------|---------------------------|
| <b>0</b>                               | 0.480                | 0.200                     | 0.120                | 0.680                     | 0.400                | 4.90                      |
| <b>50</b>                              | 0.490                | 0.260                     | 0.080                | 0.710                     | 0.430                | 6.20                      |
| <b>100</b>                             | 0.490                | 0.290                     | 0.090                | 0.860                     | 0.420                | 6.90                      |
| <b>150</b>                             | 0.500                | 0.320                     | 0.080                | 0.910                     | 0.420                | 7.50                      |
| <b>200</b>                             | 0.500                | 0.370                     | 0.060                | 1.30                      | 0.440                | 7.60                      |



**Table S10:** The principal components obtained from singular value decomposition (SVD) of the transient absorption data for ferric Cyt *c* in buffer and in the presence of synthetic monomeric crowders (Independent experiments with ~ 10 % error).

| Crowder<br>(g/L) | Glucose         |                 |               |               | Sucrose         |                 |               |               | Ethylene Glycol |                 |               |               |
|------------------|-----------------|-----------------|---------------|---------------|-----------------|-----------------|---------------|---------------|-----------------|-----------------|---------------|---------------|
|                  | $\tau_1$ (ps)   | $\tau_2$ (ps)   | $\tau_3$ (ps) | $\tau_4$ (ps) | $\tau_1$ (ps)   | $\tau_2$ (ps)   | $\tau_3$ (ps) | $\tau_4$ (ps) | $\tau_1$ (ps)   | $\tau_2$ (ps)   | $\tau_3$ (ps) | $\tau_4$ (ps) |
| <b>0</b>         | 0.120<br>±0.010 | 0.330<br>±0.110 | 5.00<br>±1.10 | 9.18<br>±1.01 | 0.120<br>±0.010 | 0.330<br>±0.110 | 5.00<br>±1.25 | 9.18<br>±1.01 | 0.120<br>±0.010 | 0.330<br>±0.110 | 5.00<br>±1.30 | 9.18<br>±1.01 |
| <b>50</b>        | 0.120<br>±0.020 | 0.390<br>±0.160 | 4.18<br>±1.11 | 10.4<br>±1.4  | 0.120<br>±0.010 | 0.520<br>±0.050 | 3.91<br>±0.40 | 11.7<br>±1.2  | 0.140<br>±0.010 | 0.370<br>±0.040 | 4.09<br>±0.39 | 12.1<br>±1.5  |
| <b>100</b>       | 0.120<br>±0.020 | 0.440<br>±0.190 | 4.04<br>±1.07 | 15.4<br>±2.0  | 0.190<br>±0.020 | 0.630<br>±0.060 | 4.15<br>±0.41 | 23.5<br>±2.5  | 0.160<br>±0.020 | 0.260<br>±0.030 | 4.30<br>±0.41 | 19.1<br>±1.9  |
| <b>150</b>       | 0.220<br>±0.020 | 0.540<br>±0.210 | 4.47<br>±0.62 | 92.5<br>±5.0  | 0.160<br>±0.020 | 0.230<br>±0.020 | 3.95<br>±0.37 | 19.1<br>±2.1  | 0.190<br>±0.020 | 0.420<br>±0.050 | 4.30<br>±0.36 | 23.1<br>±1.9  |
| <b>200</b>       | 0.110<br>±0.010 | 0.650<br>±0.230 | 5.03<br>±1.23 | 163.9<br>±8.5 | 0.150<br>±0.010 | 0.260<br>±0.020 | 3.84<br>±0.42 | 15.7<br>±1.7  | 0.200<br>±0.020 | 0.650<br>±0.060 | 4.96<br>±0.60 | 28.1<br>±2.5  |

**Table S11:** The principal components obtained from singular value decomposition (SVD) of the transient absorption data for ferrous Cyt *c* in buffer and in the presence of synthetic monomeric crowders (Independent experiments with ~ 10 % error).

| Crowder<br>(g/L) | Glucose         |                 |               |               | Sucrose         |                 |               |               | Ethylene Glycol |                 |               |               |
|------------------|-----------------|-----------------|---------------|---------------|-----------------|-----------------|---------------|---------------|-----------------|-----------------|---------------|---------------|
|                  | $\tau_1$ (ps)   | $\tau_2$ (ps)   | $\tau_3$ (ps) | $\tau_4$ (ps) | $\tau_1$ (ps)   | $\tau_2$ (ps)   | $\tau_3$ (ps) | $\tau_4$ (ps) | $\tau_1$ (ps)   | $\tau_2$ (ps)   | $\tau_3$ (ps) | $\tau_4$ (ps) |
| <b>0</b>         | 0.220<br>±0.410 | 0.560<br>±0.070 | 2.77<br>±0.16 | 7.20<br>±1.06 | 0.220<br>±0.410 | 0.560<br>±0.070 | 2.77<br>±0.16 | 7.20<br>±1.06 | 0.220<br>±0.410 | 0.560<br>±0.070 | 2.77<br>±0.16 | 7.20<br>±1.06 |
| <b>50</b>        | 0.240<br>±0.030 | 1.57<br>±0.18   | 4.72<br>±0.49 | 10.7<br>±1.3  | 0.290<br>±0.030 | 0.650<br>±0.070 | 3.88<br>±0.41 | 12.1<br>±1.3  | 0.260<br>±0.020 | 0.600<br>±0.050 | 4.82<br>±0.52 | 8.98<br>±0.93 |
| <b>100</b>       | 0.260<br>±0.030 | 0.690<br>±0.070 | 4.82<br>±0.46 | 13.3<br>±1.4  | 0.340<br>±0.040 | 0.800<br>±0.070 | 5.48<br>±0.61 | 21.9<br>±2.0  | 0.300<br>±0.030 | 0.810<br>±0.080 | 5.52<br>±0.58 | 10.1<br>±1.1  |
| <b>150</b>       | 0.280<br>±0.030 | 1.00<br>±0.09   | 5.55<br>±0.62 | 15.4<br>±1.6  | 0.320<br>±0.030 | 0.580<br>±0.050 | 4.40<br>±0.46 | 17.8<br>±1.6  | 0.340<br>±0.030 | 0.890<br>±0.090 | 6.03<br>±0.65 | 12.1<br>±1.3  |
| <b>200</b>       | 0.310<br>±0.030 | 0.670<br>±0.060 | 5.20<br>±0.53 | 20.4<br>±1.9  | 0.320<br>±0.030 | 0.440<br>±0.040 | 4.63<br>±0.49 | 15.9<br>±1.5  | 0.400<br>±0.040 | 1.01<br>±0.01   | 4.25<br>±0.42 | 15.2<br>±1.7  |

**Table S12:** The principal components obtained from singular value decomposition (SVD) of the transient absorption data for ferric Cyt *c* in buffer and in the presence of protein crowders (Independent experiments with ~ 10 % error).

| <b>Crowder</b><br>(g/L) | <b>Bovine Serum Albumin</b> |               |               |               | <b><math>\beta</math>-Lactoglobulin</b> |               |               |               |
|-------------------------|-----------------------------|---------------|---------------|---------------|-----------------------------------------|---------------|---------------|---------------|
|                         | $\tau_1$ (ps)               | $\tau_2$ (ps) | $\tau_3$ (ps) | $\tau_4$ (ps) | $\tau_1$ (ps)                           | $\tau_2$ (ps) | $\tau_3$ (ps) | $\tau_4$ (ps) |
| <b>0</b>                | 0.120±0.010                 | 0.330±0.110   | 5.00±1.30     | 9.18±1.01     | 0.120±0.010                             | 0.330±0.110   | 5.00±1.25     | 9.18±1.01     |
| <b>25</b>               | 0.150±0.010                 | 0.420±0.050   | 5.58±0.62     | 236.1±25.6    | 0.120±0.010                             | 0.390±0.040   | 3.90±0.38     | 123.0±11.6    |
| <b>50</b>               | 0.170±0.020                 | 0.480±0.050   | 6.83±0.65     | 318.5±33.1    | 0.140±0.010                             | 0.420±0.050   | 4.35±0.42     | 159.6±14.5    |
| <b>75</b>               | 0.190±0.020                 | 0.540±0.060   | 7.48±0.75     | 732.2±75.2    | 0.150±0.010                             | 0.440±0.050   | 3.86±0.36     | 224.4±21.3    |
| <b>100</b>              | 0.260±0.030                 | 0.640±0.060   | 6.51±0.59     | 1178±101      | 0.210±0.020                             | 0.480±0.050   | 3.81±0.37     | 442.2±39.5    |
| <b>125</b>              | 0.220±0.020                 | 0.460±0.050   | 3.89±0.41     | 145.2±11.2    | 0.190±0.020                             | 0.460±0.040   | 4.09±0.39     | 106.6±9.8     |
| <b>150</b>              | 0.200±0.020                 | 0.400±0.040   | 3.53±0.38     | 56.0±4.5      | 0.130±0.010                             | 0.280±0.030   | 4.17±0.39     | 84.0±7.6      |

**Table S13:** The principal components obtained from singular value decomposition (SVD) of the transient absorption data for ferrous Cyt *c* in buffer and in the presence of protein crowders (Independent experiments with ~ 10 % error).

| Crowder<br>(g/L) | Bovine Serum Albumin |               |               |               | $\beta$ -Lactoglobulin |               |               |               |
|------------------|----------------------|---------------|---------------|---------------|------------------------|---------------|---------------|---------------|
|                  | $\tau_1$ (ps)        | $\tau_2$ (ps) | $\tau_3$ (ps) | $\tau_4$ (ps) | $\tau_1$ (ps)          | $\tau_2$ (ps) | $\tau_3$ (ps) | $\tau_4$ (ps) |
| 0                | 0.220±0.410          | 0.560±0.070   | 2.77±0.16     | 7.20±1.06     | 0.220±0.410            | 0.560±0.070   | 2.77±0.16     | 7.20±1.06     |
| 25               | 0.260±0.030          | 0.600±0.060   | 5.93±0.57     | 117.1±12.3    | 0.250±0.020            | 0.580±0.060   | 4.98±0.51     | 39.6±3.5      |
| 50               | 0.300±0.030          | 0.670±0.060   | 5.96±0.61     | 465.0±44.1    | 0.290±0.030            | 0.620±0.060   | 5.48±0.57     | 83.9±8.7      |
| 75               | 0.340±0.040          | 0.720±0.070   | 5.85±0.56     | 511.0±47.6    | 0.320±0.030            | 0.640±0.060   | 5.45±0.55     | 113.8±10.3    |
| 100              | 0.360±0.040          | 0.790±0.080   | 6.32±0.61     | 746.3±73.2    | 0.300±0.030            | 0.600±0.060   | 5.41±0.51     | 97.7±8.3      |
| 125              | 0.290±0.030          | 0.550±0.060   | 5.49±0.53     | 333.1±32.6    | 0.290±0.030            | 0.590±0.050   | 5.19±0.49     | 73.7±6.7      |
| 150              | 0.230±0.020          | 0.520±0.050   | 5.09±0.49     | 78.9±7.6      | 0.240±0.020            | 0.570±0.050   | 5.18±0.56     | 58.2±8.3      |

**Table S14:** Amplitudes obtained from decay kinetics of ferric Cyt *c*, probed at 600 nm in the buffer as a function of increasing pump power.

| <b>Components<br/>Pump<br/>Power</b> | <b>0.120 (ps)</b> | <b>0.360 (ps)</b> | <b>3.65 (ps)</b> | <b>6.22 (ps)</b> | <b>Inf &gt;8 ns</b> |
|--------------------------------------|-------------------|-------------------|------------------|------------------|---------------------|
| <b>0.3 mW</b>                        | 0.530             | 0.0600            | 0.260            | 0.150            | 0.0000600           |
| <b>0.5 mW</b>                        | 0.514             | 0.0700            | 0.255            | 0.170            | 0.000100            |
| <b>0.6 mW</b>                        | 0.558             | 0.0950            | 0.228            | 0.110            | 0.00900             |
| <b>0.7 mW</b>                        | 0.560             | 0.0800            | 0.270            | 0.0800           | 0.0100              |
| <b>0.9 mW</b>                        | 0.560             | 0.0900            | 0.280            | 0.0500           | 0.0200              |
| <b>1.1 mW</b>                        | 0.570             | 0.0700            | 0.290            | 0.0500           | 0.0200              |

**Table S15:** Amplitudes obtained from decay kinetics of ferrous Cyt *c*, probing at 575 nm in the buffer as a function of increasing pump power.

| <b>Components<br/>Pump<br/>Power</b> | <b>0.270 (ps)</b> | <b>0.610 (ps)</b> | <b>2.30 (ps)</b> | <b>6.80 (ps)</b> | <b>Inf &gt;8 ns</b> |
|--------------------------------------|-------------------|-------------------|------------------|------------------|---------------------|
| <b>0.1 mW</b>                        | 0.470             | 0.100             | 0.230            | 0.200            | 0.0000100           |
| <b>0.2 mW</b>                        | 0.480             | 0.110             | 0.240            | 0.170            | 0.0000240           |
| <b>0.3 mW</b>                        | 0.500             | 0.120             | 0.250            | 0.130            | 0.0000370           |
| <b>0.5 mW</b>                        | 0.510             | 0.120             | 0.270            | 0.100            | 0.0000800           |
| <b>0.7 mW</b>                        | 0.525             | 0.130             | 0.270            | 0.0480           | 0.0270              |
| <b>0.8 mW</b>                        | 0.531             | 0.130             | 0.275            | 0.0330           | 0.0310              |

**Figure S1.1** – Ground state absorption spectra of ferric Cytochrome *c* in presence of (A) Dextran 40, (B) Ficoll 70, (C) PEG 8 and (D) Dextran 70 (Dashed arrow in blue indicating the pump wavelength 400 nm).

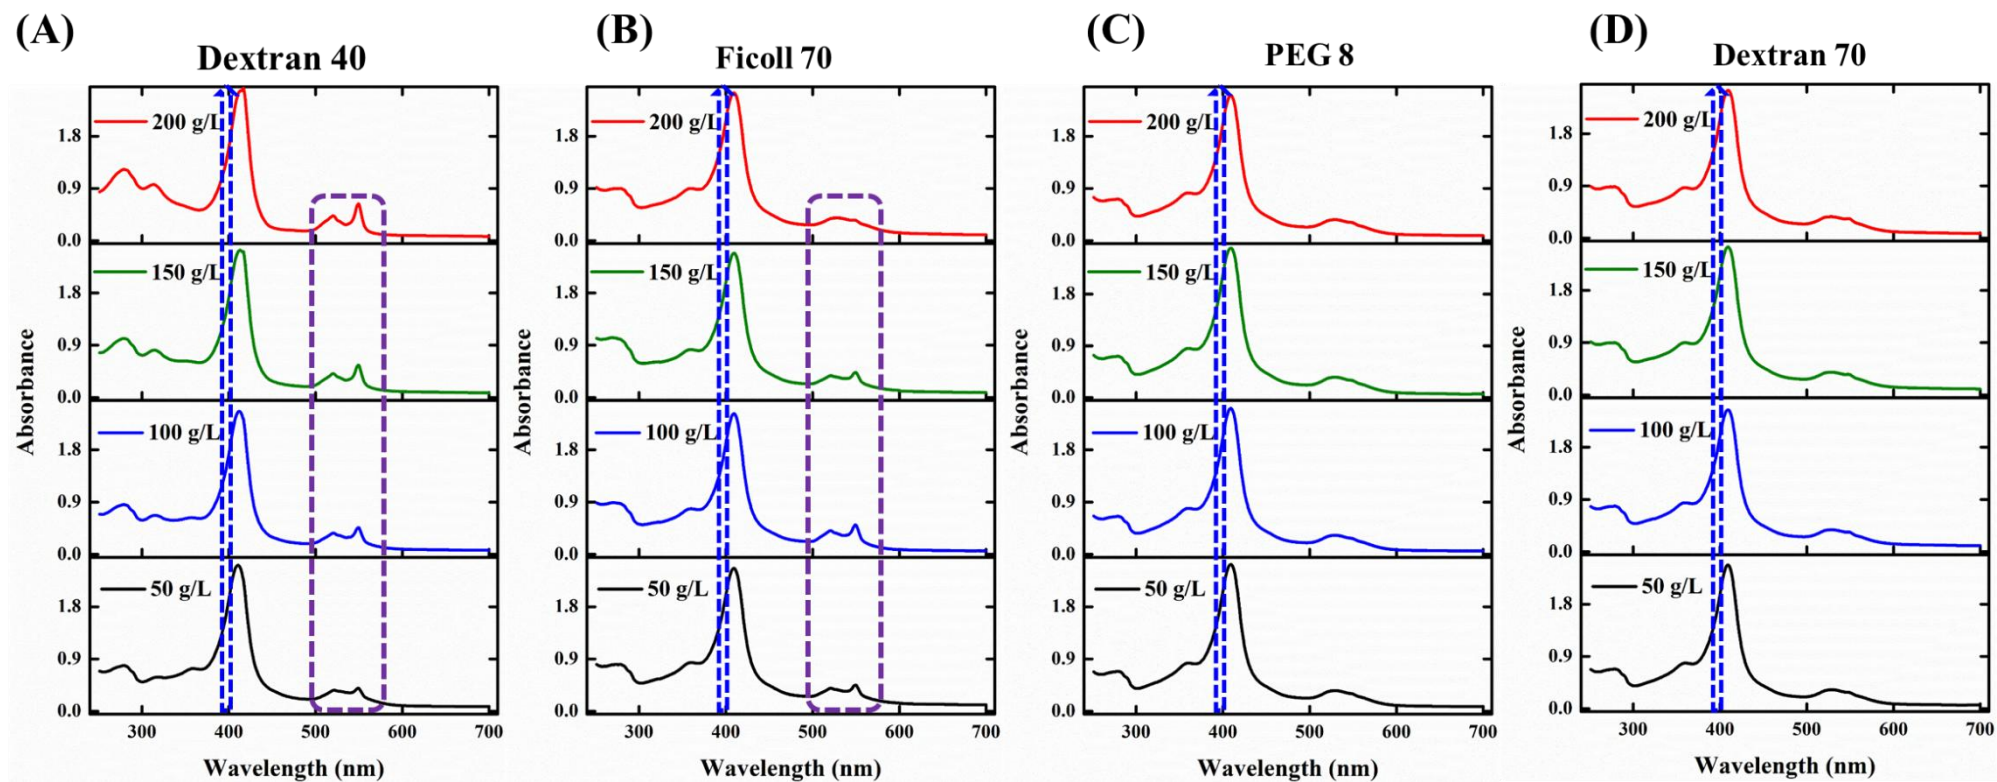

**Figure S1.2** – Ground state absorption spectra of ferrous Cytochrome *c* in presence of (A) Dextran 40, (B) Ficoll 70, (C) PEG 8 and (D) Dextran 70 (Dashed arrow in blue indicating the pump wavelength 400 nm).

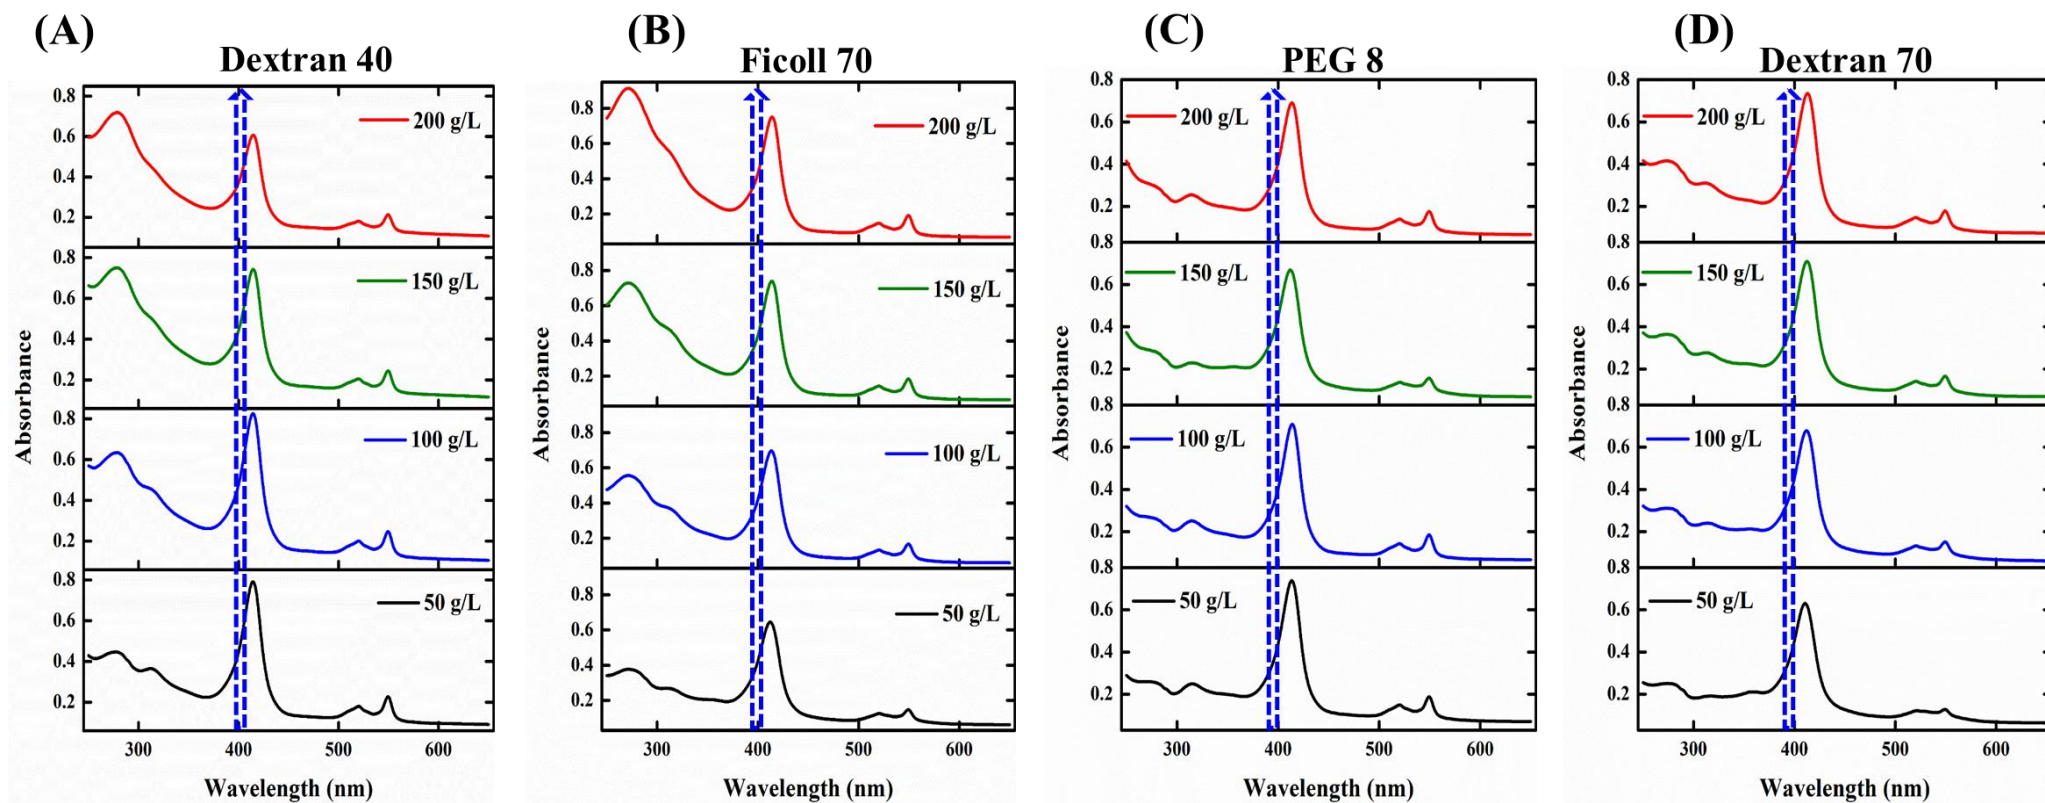



**Figure S1.3** – Ground state absorption spectra of ferric Cytochrome *c* in presence of (A) Glucose, (B) Sucrose, and (C) Ethylene Glycol (Dashed arrow in blue indicating the pump wavelength 400 nm).

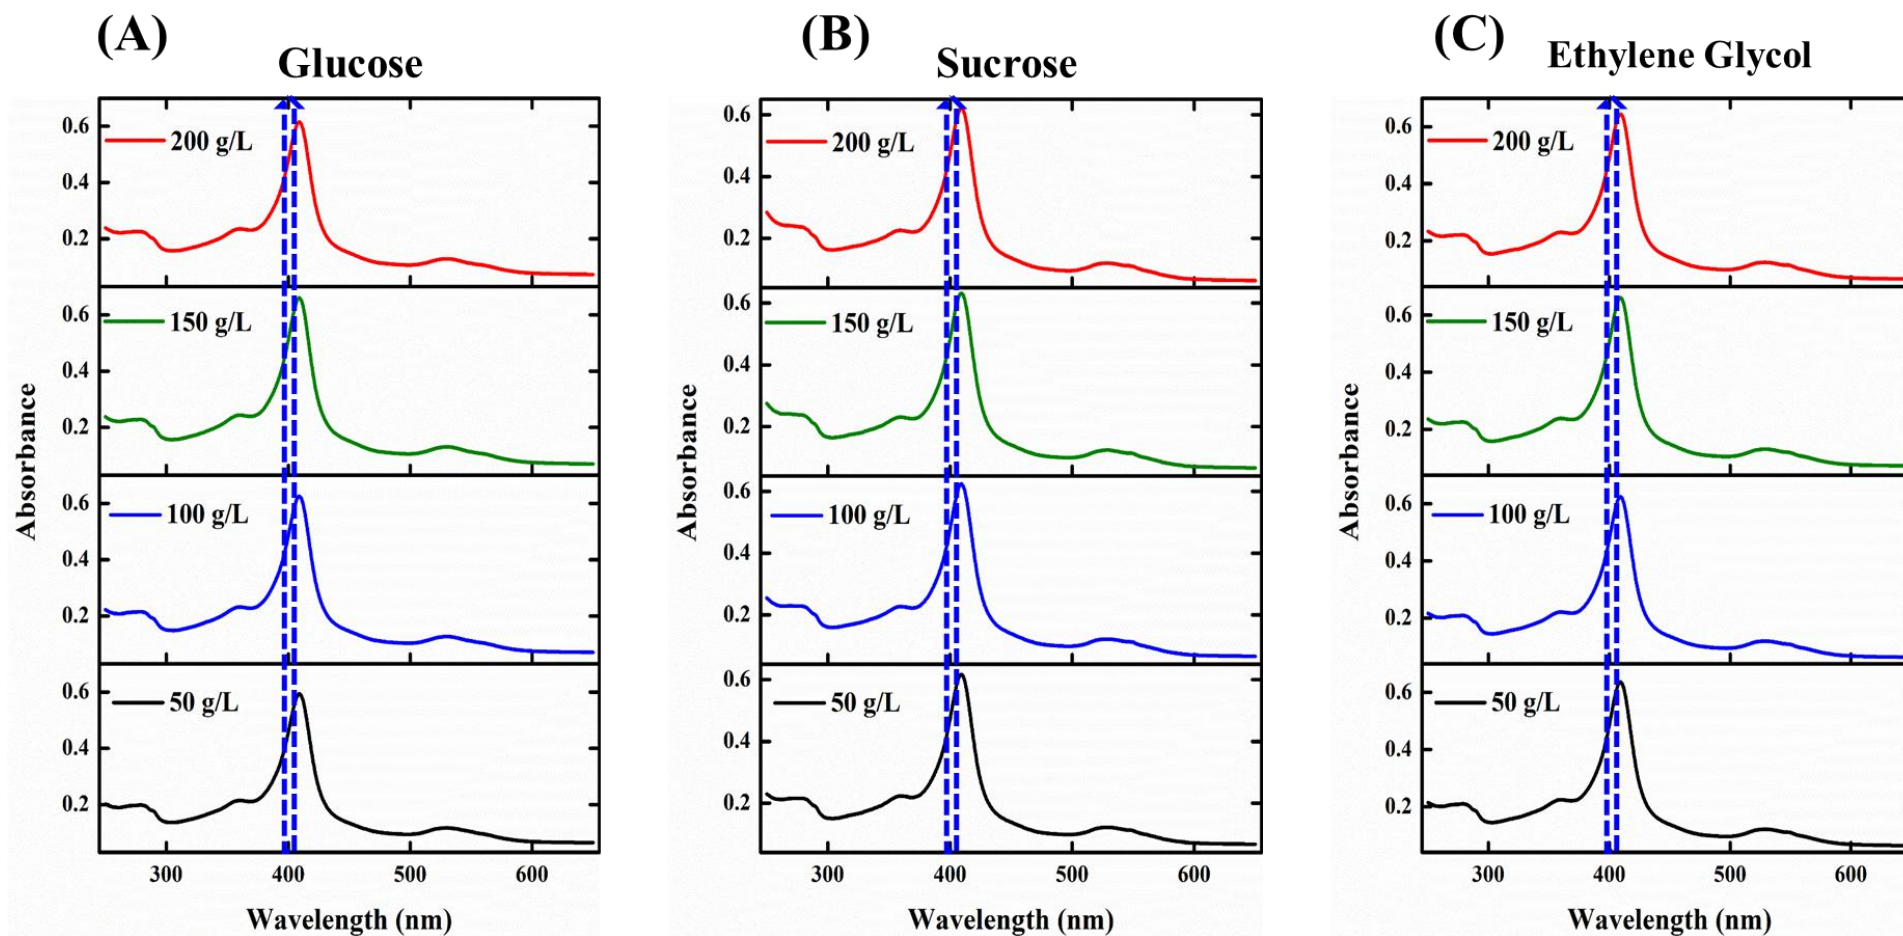

**Figure S1.4** – Ground state absorption spectra of ferrous Cytochrome *c* in presence of (A) Glucose, (B) Sucrose, and (C) Ethylene Glycol (Dashed arrow in blue indicating the pump wavelength 400 nm).

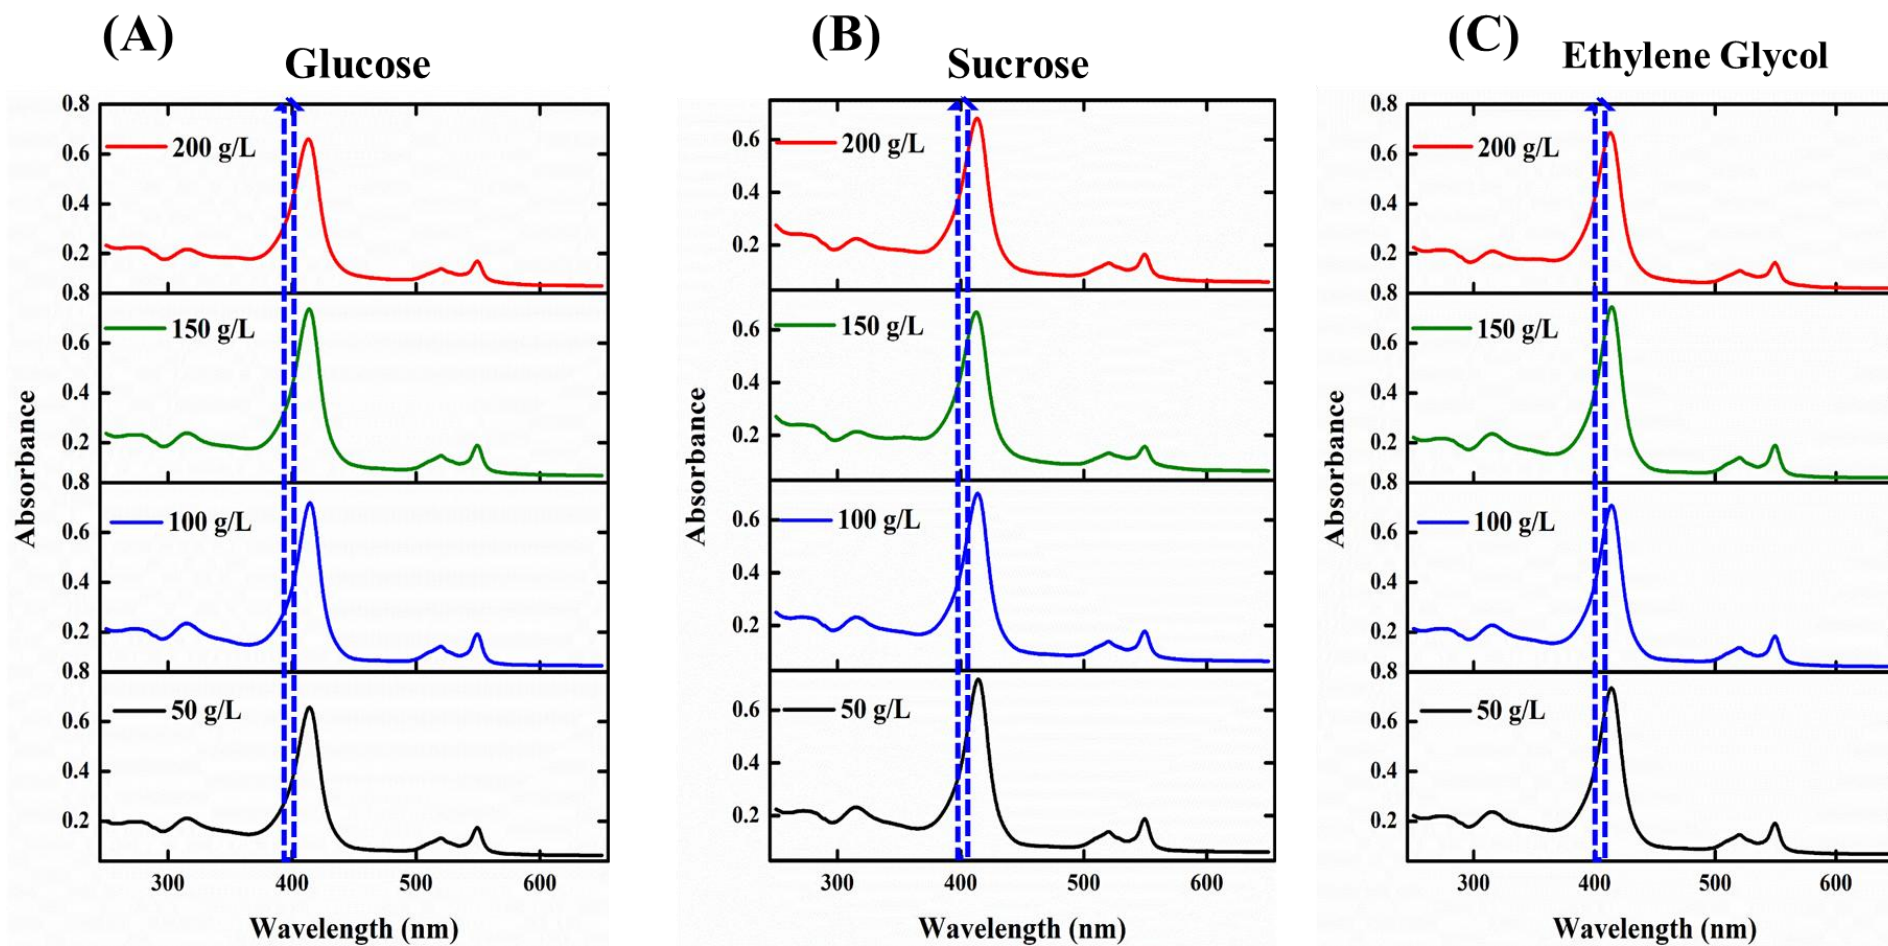

**Figure S1.5** – Ground state absorption spectra of (A) ferric and (B) ferrous Cytochrome *c* in presence of BSA as crowder and (C) ferric and (D) ferrous Cyt *c* in presence of  $\beta$ -LG as crowder (Dashed arrow in blue indicating the pump wavelength 400 nm).

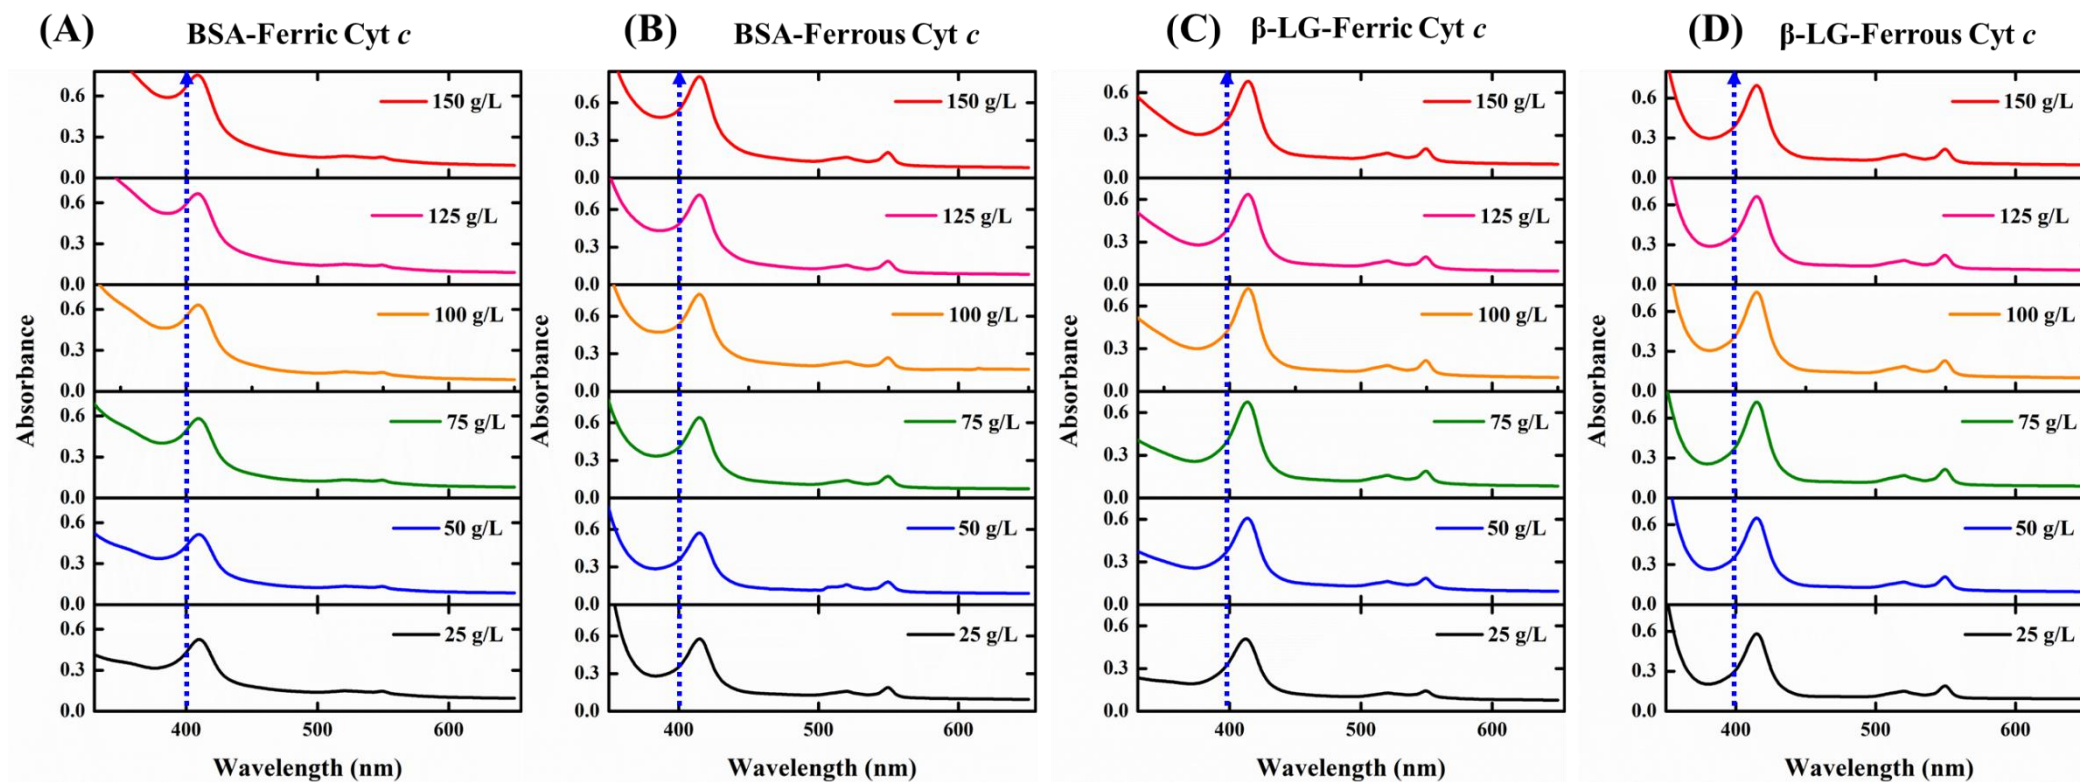

**Figure S2** – Transient Absorption Spectra of  $\text{Fe}^{3+}$  cyt *c* in presence of Crowders, [A-D] Dextran 40, [E-H] Ficoll 70, [I-L] PEG 8 and [M-P] Dextran 70 at varying concentration from 50 to 200 g/L.

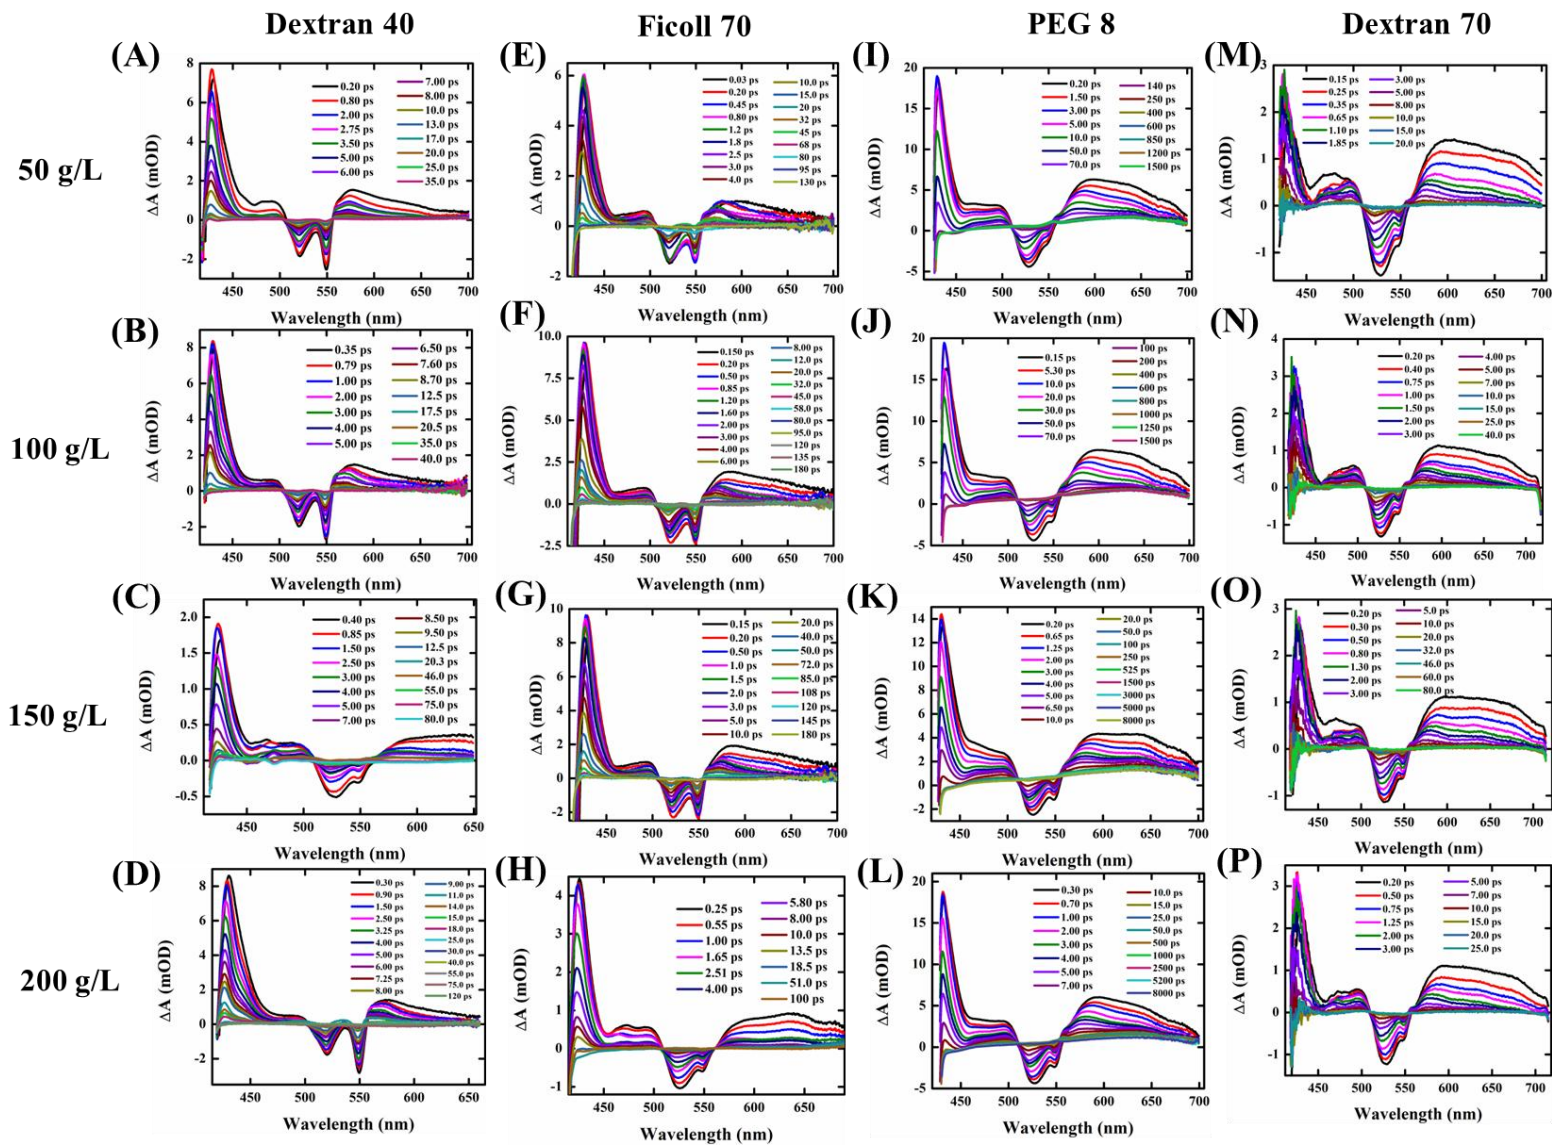

**Figure S3** – Single Wavelength Kinetics Spectra of  $\text{Fe}^{3+}$  cytochrome *c* probed at 600 nm in the presence of synthetic crowders, (A) Dextran 40, (B) Dextran 70, (C) Ficoll 70, (D) PEG 8, (E) Glucose, (F) Sucrose and (G) Ethylene glycol.

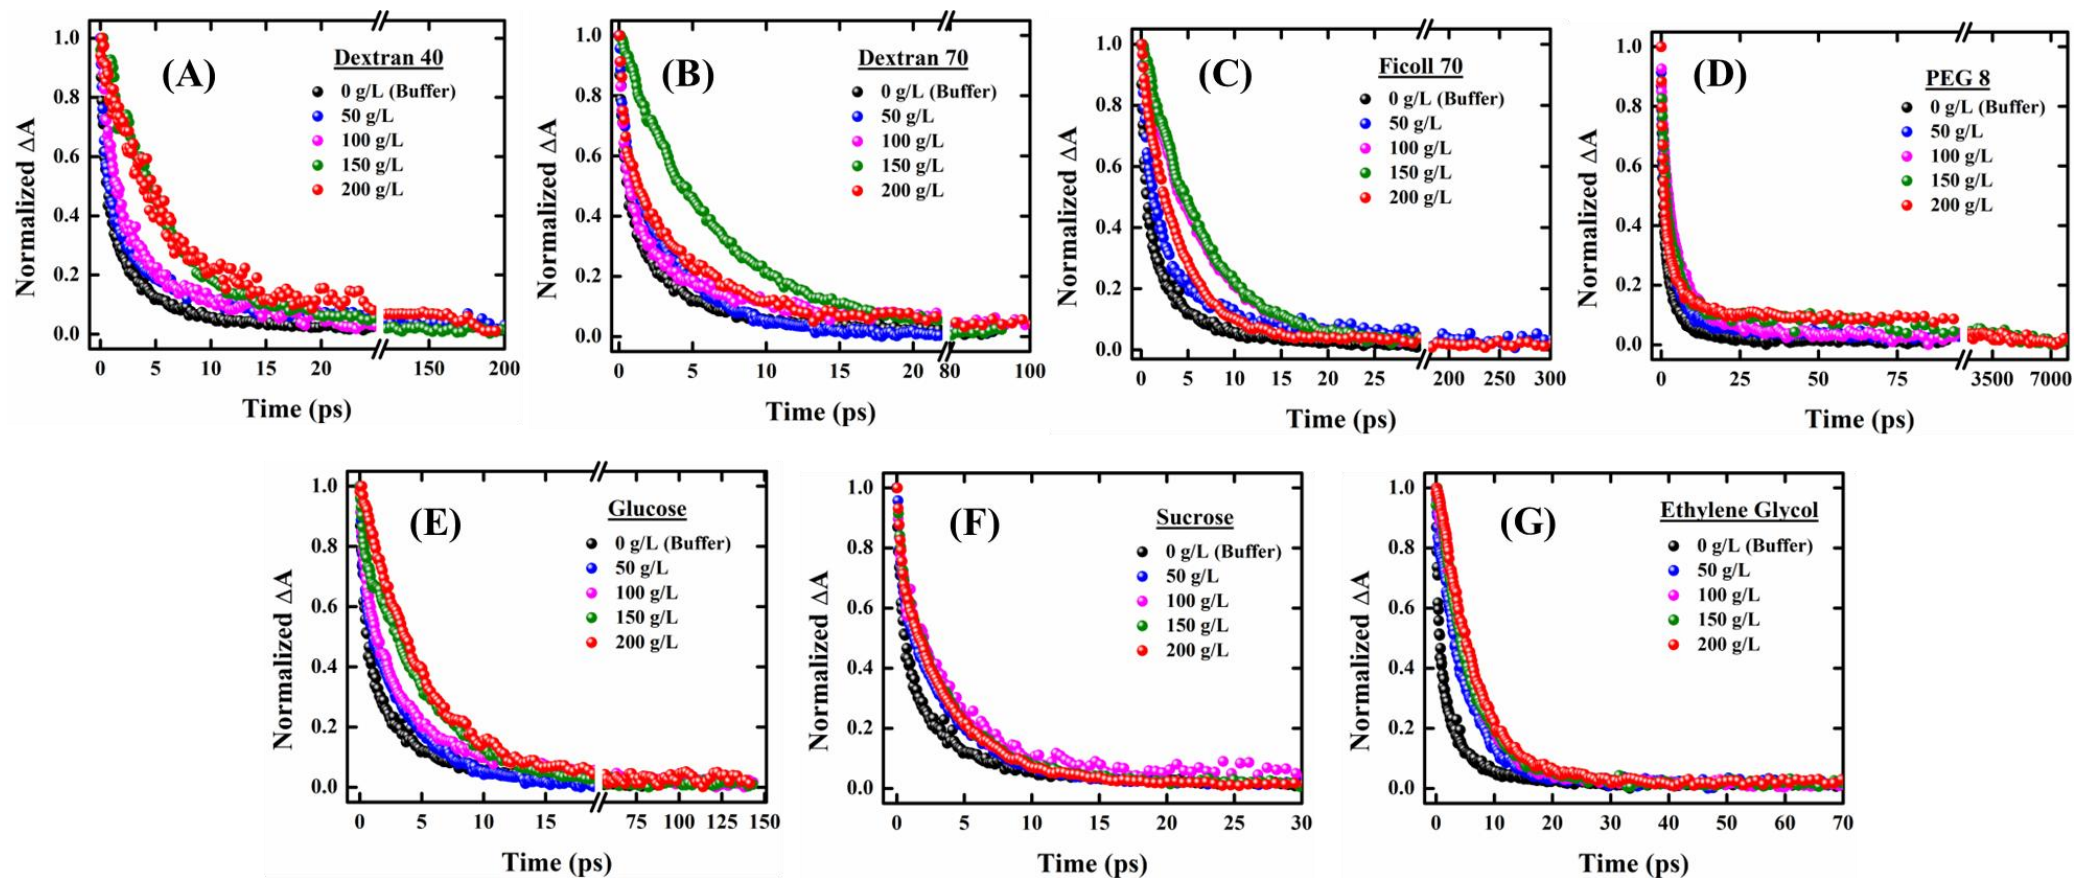

**Figure S4** – Comparison of (i) ground state absorption spectra and DAS of excited state decay ( $\tau_1$ ) of heme of (A) ferric, (B) ferrous in the buffer. (ii) transient absorption spectra at early time delay (0.15 ps) and DAS of  $\tau_2$  component for (C) ferric and (D) DAS of both  $\tau_2$  and  $\tau_3$  components for Ferrous. (iii) Methionine rebinding DAS ( $\tau_4$ ) of ferrous with (E) Differential ground state absorption of ferric and ferrous and (F) Ground state absorption spectra of ferrous Cyt *c* in the buffer.

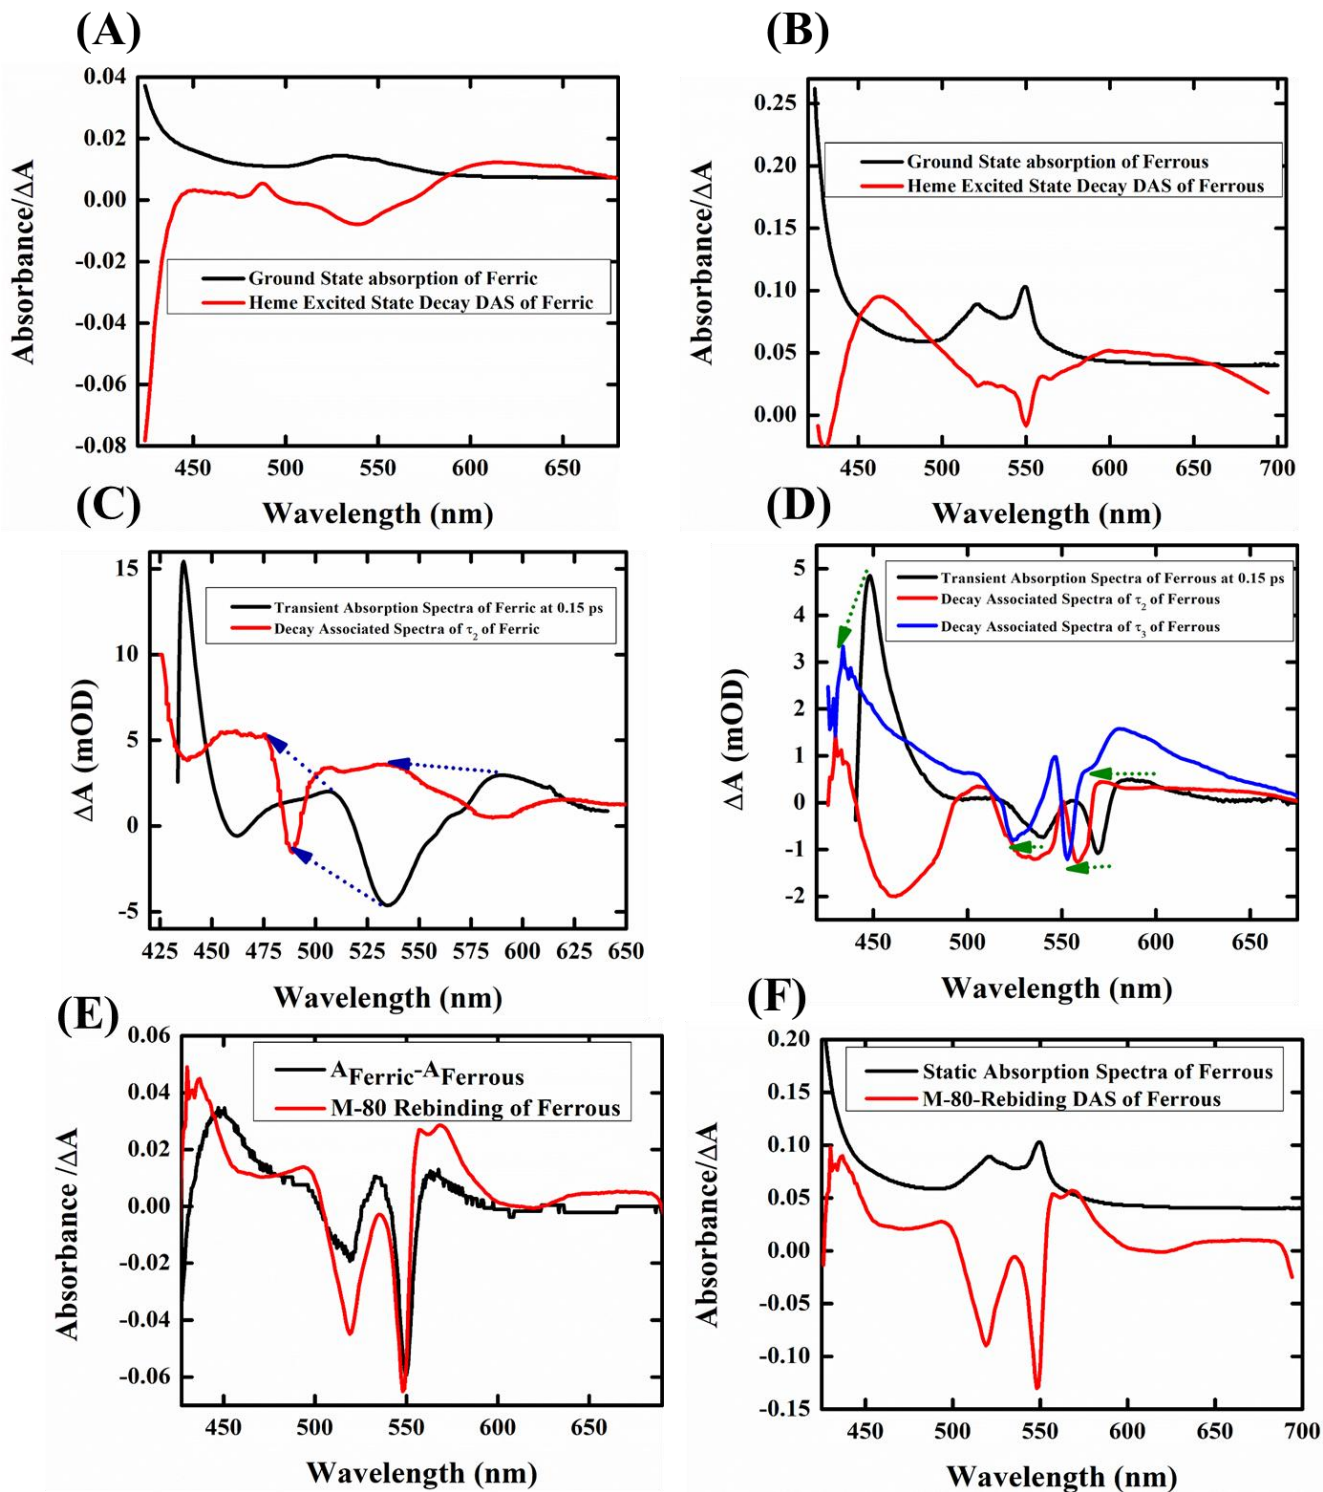

**Figure S5:** Transient absorption spectra of (A) ferric and (B) ferrous Cyt *c* in buffer exhibiting vibrational cooling through spectral blue shift and narrowing of bands.

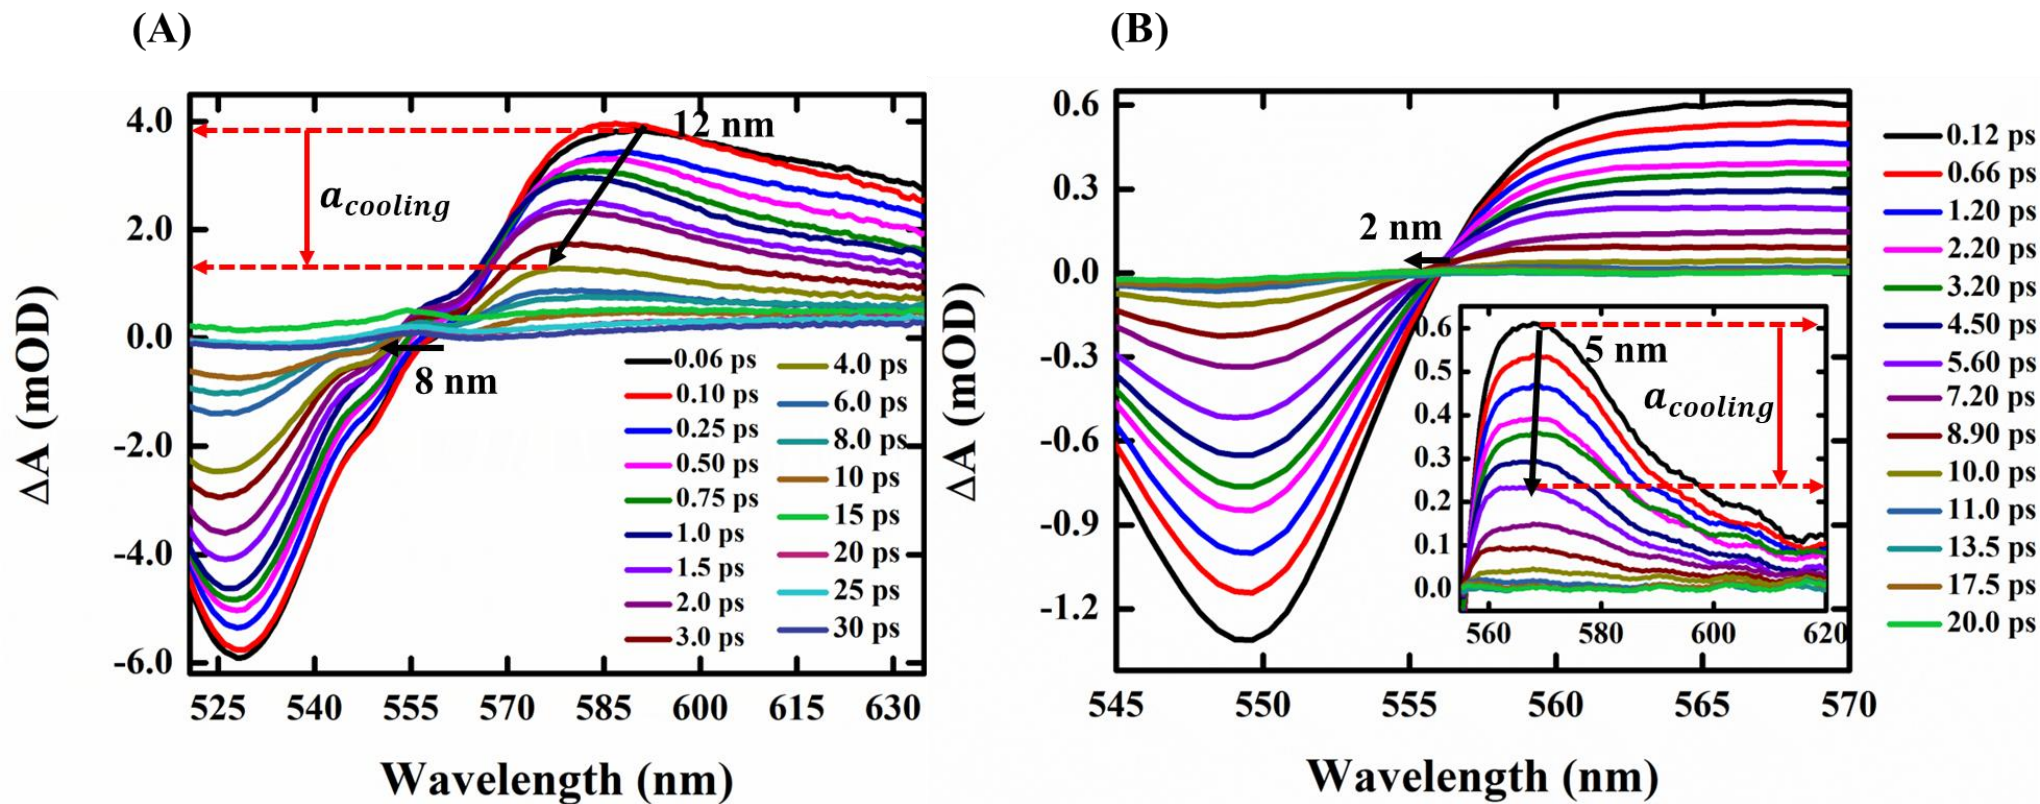

**Figure S6:** Overlapped transient absorption decay of (A-J) ferric (435 and 600 nm) and (K-T) ferrous Cyt *c* (430 and 575 nm) in buffer and in the presence of PEG 8 [(B-F) and (L-O)] and BSA [(F-J) and (P-T)].

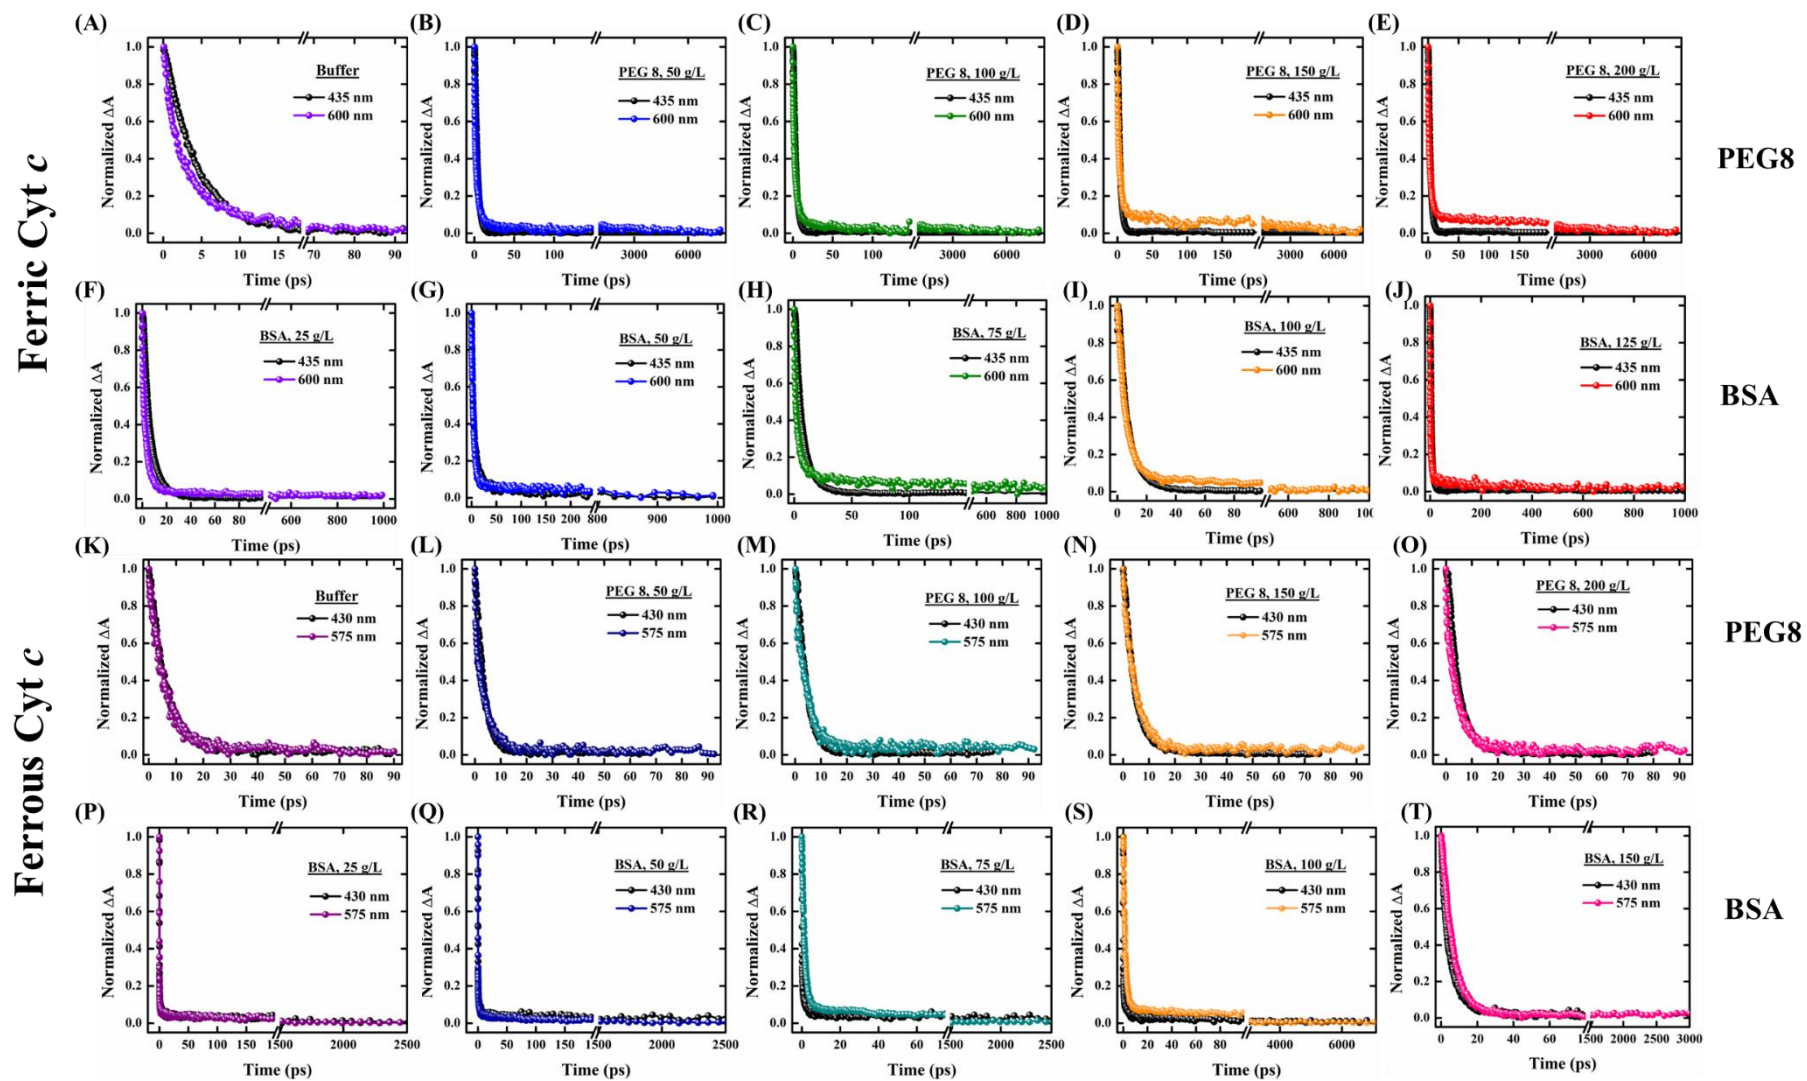



**Figure S7** – Normalized Decay Associated Spectra of ferric Cytochrome *c* in presence of buffer, (A - D) PEG 8, (E - H) Ficoll 70, (I - L) Dextran 40 and (M - P) Dextran 70.

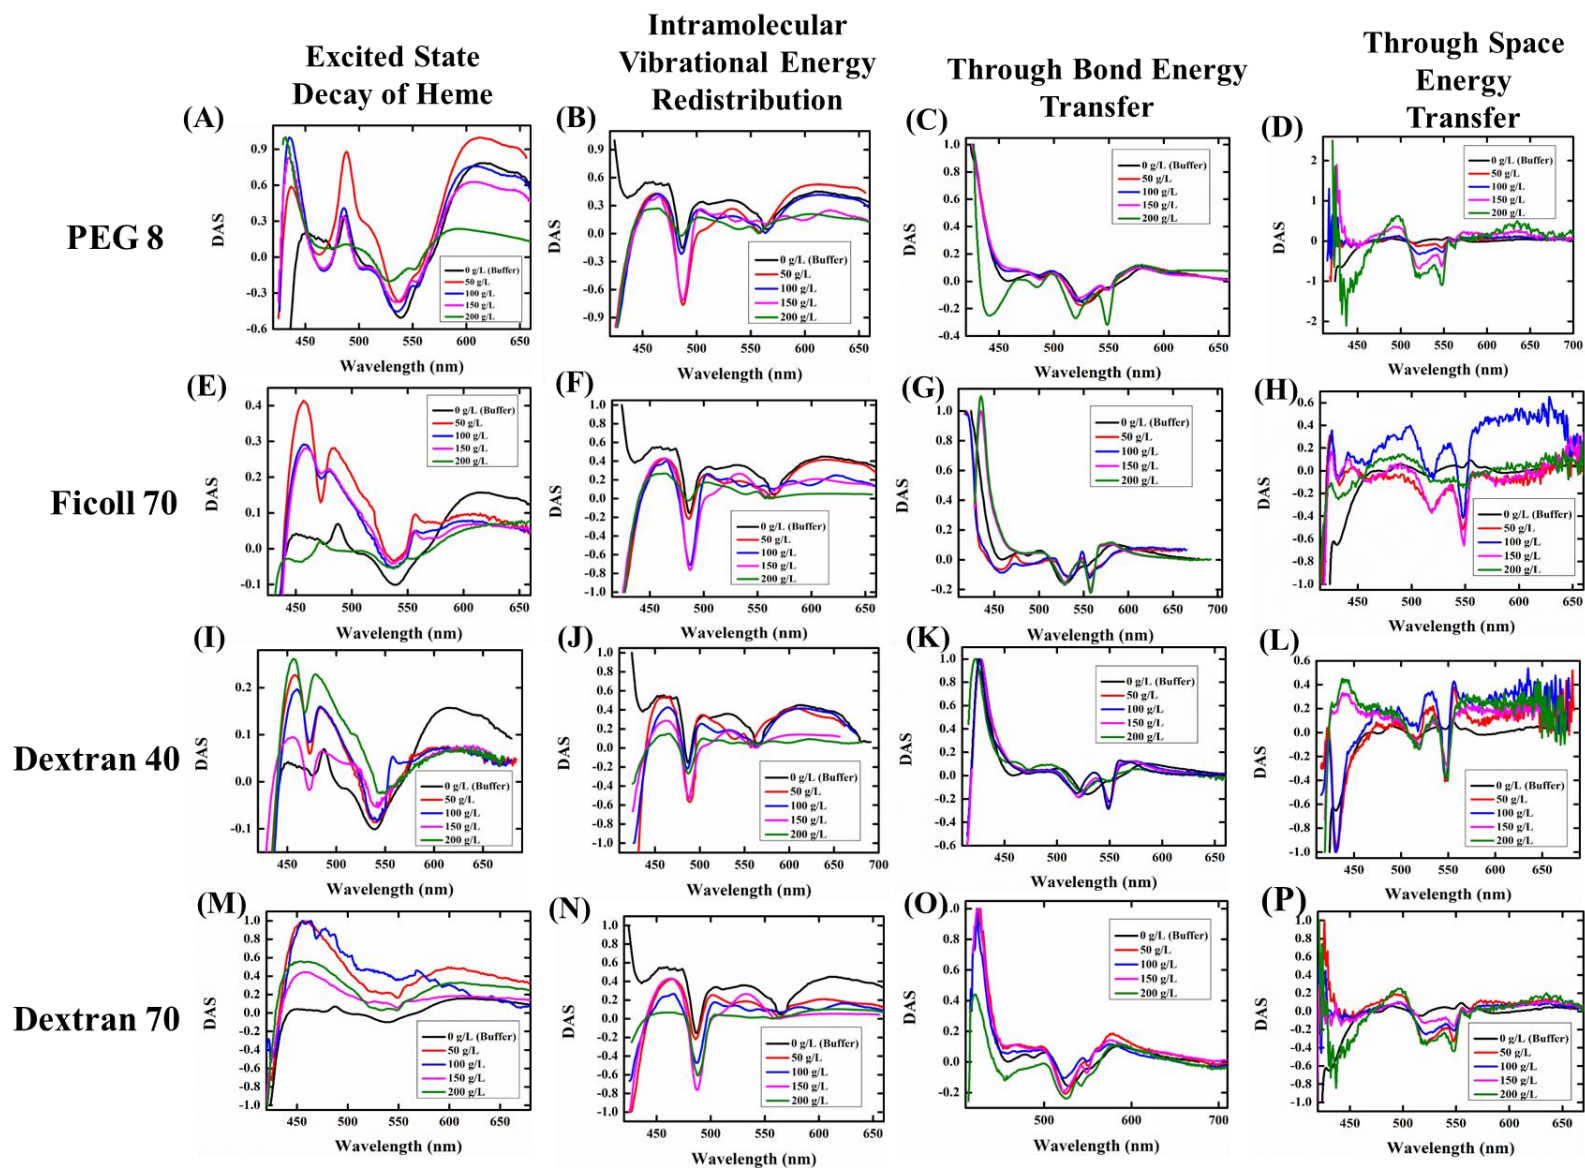

**Figure S8** – Normalized Decay Associated Spectra of ferrous Cytochrome *c* in presence of buffer, (A - D) PEG 8, (E - H) Ficoll 70, (I – L) Dextran 40 and (M - P) Dextran 70.

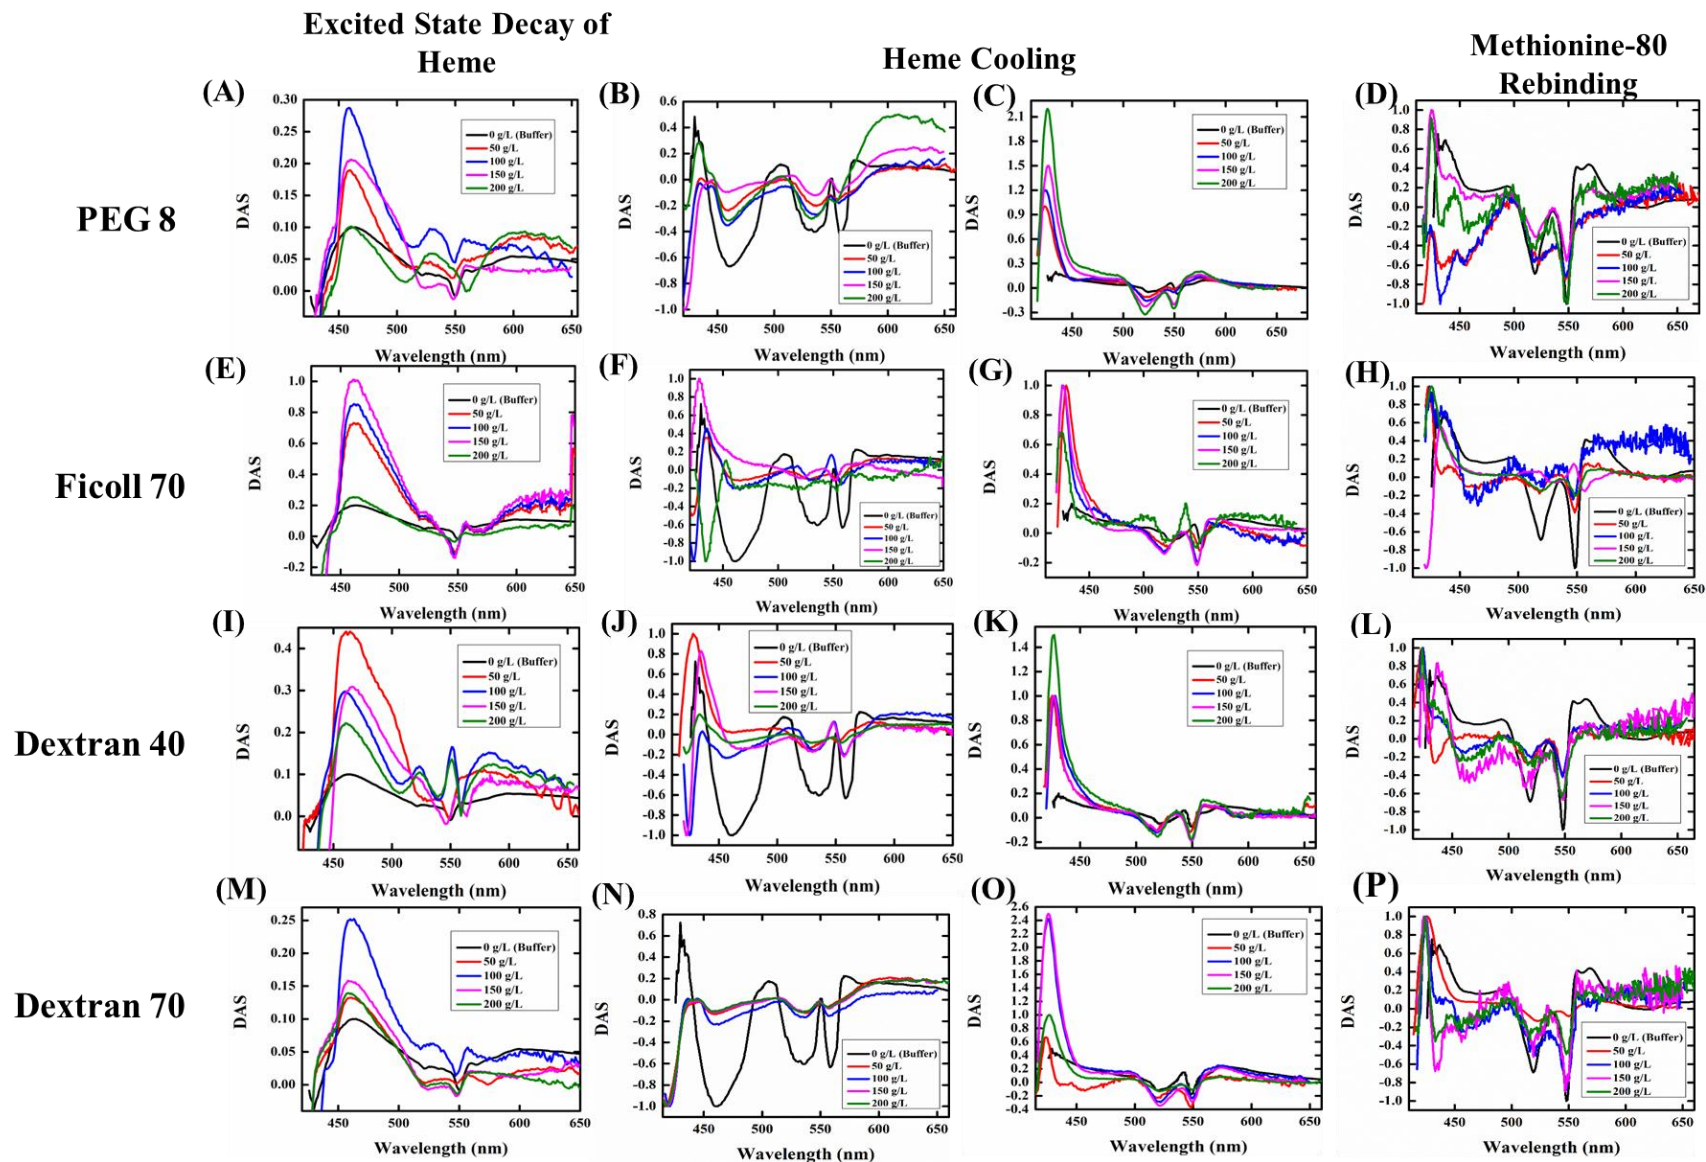

**Figure S9** – Comparison of transient absorption spectra at early time delay (0.15 ps) and (i) DAS of  $\tau_2$  component for ferric (A-H), (ii) DAS of both  $\tau_2$  and  $\tau_3$  components for ferrous (I-L) Cytochrome *c* in the presence of crowders as mentioned at the top (concentrations as mentioned to the left of the figure panels).

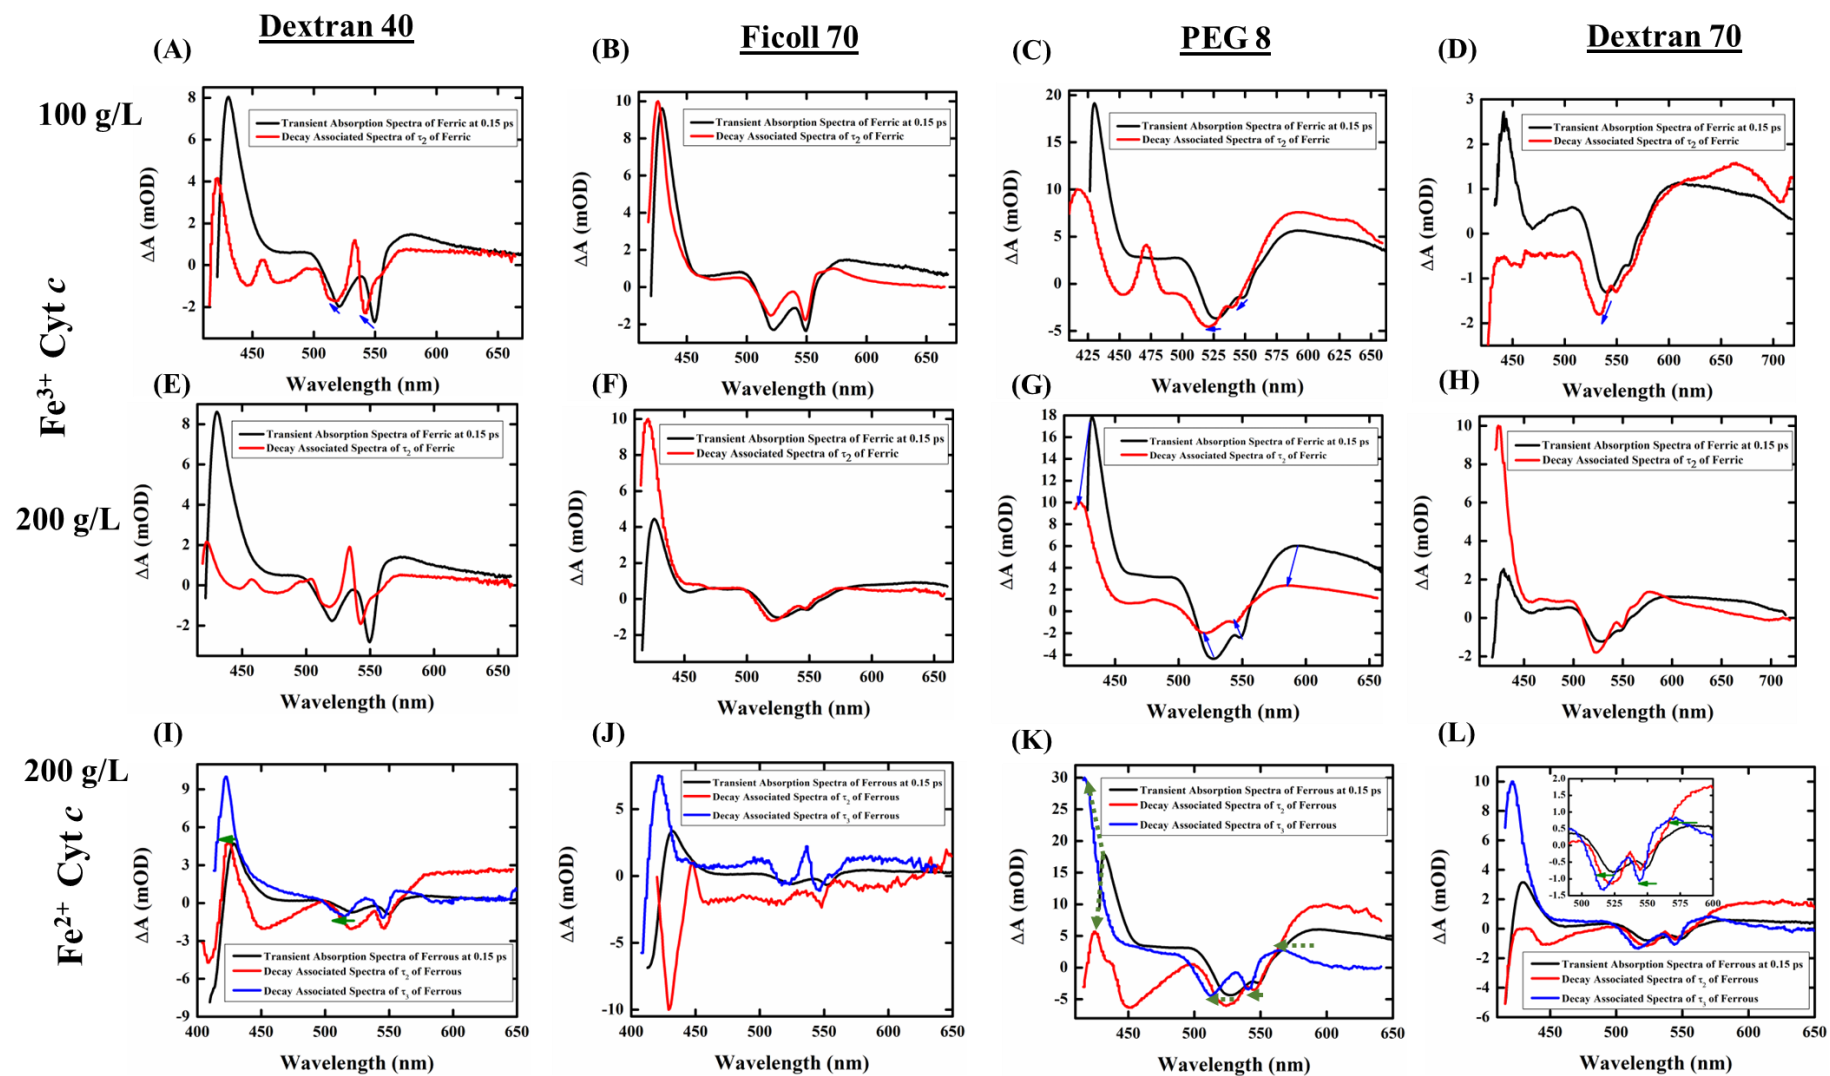

**Figure S10** – Secondary structure of  $\text{Fe}^{3+}$  Cyt *c* obtained at 25 °C in the presence of buffer and synthetic polymeric crowders of (A) 100 g/L, (B) 200 g/L and  $\text{Fe}^{2+}$  Cyt *c* in the presence of crowders of (C) 100 g/L, (D) 200 g/L. Active site structure of  $\text{Fe}^{3+}$  Cyt *c* in the presence of buffer and crowders of (E) 100 g/L, (F) 200 g/L and  $\text{Fe}^{2+}$  Cyt *c* in the presence of crowders of (G) 100 g/L, (H) 200 g/L as mentioned in the panels, with the data points in the CD spectra shown being an average of four independent scans (error bars not shown for clarity of data).

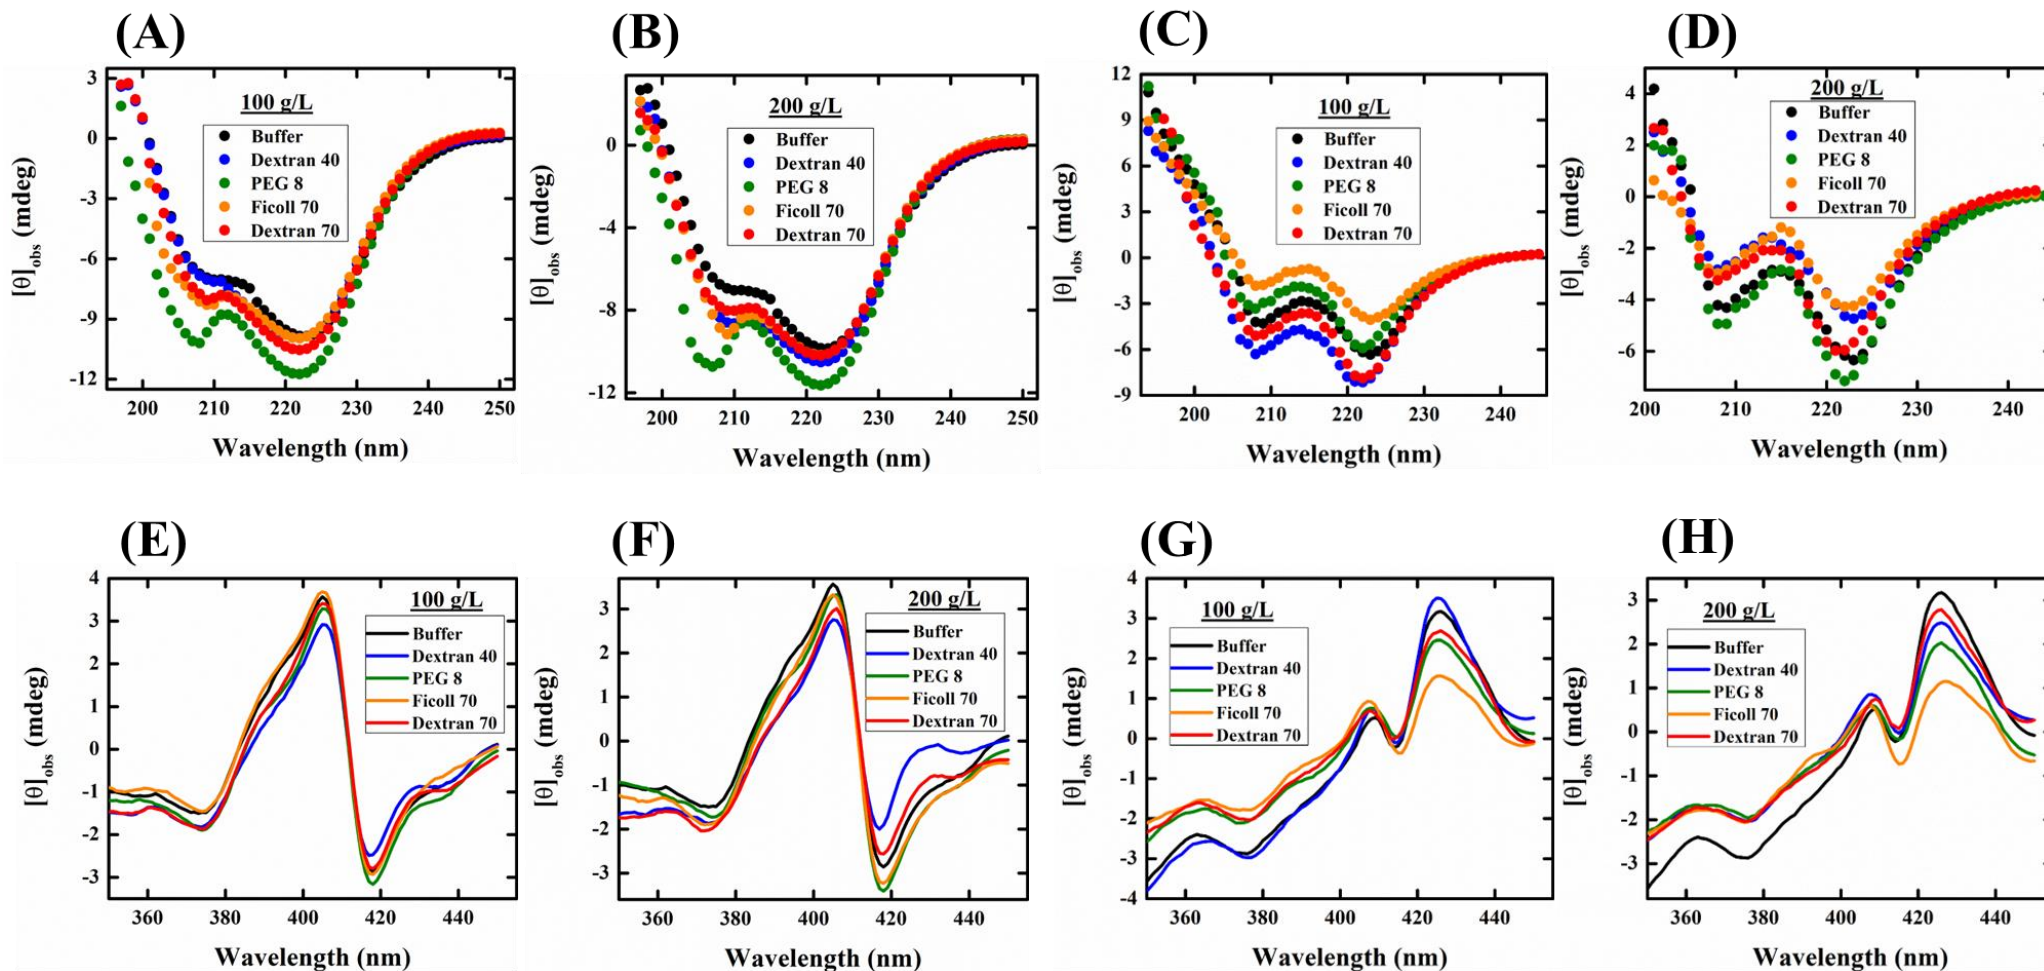

Figure S11 – Steady-state fluorescence spectra of ferric Cytochrome *c* (top panel) and ferrous Cytochrome *c* (bottom panel) in presence of buffer and crowders.

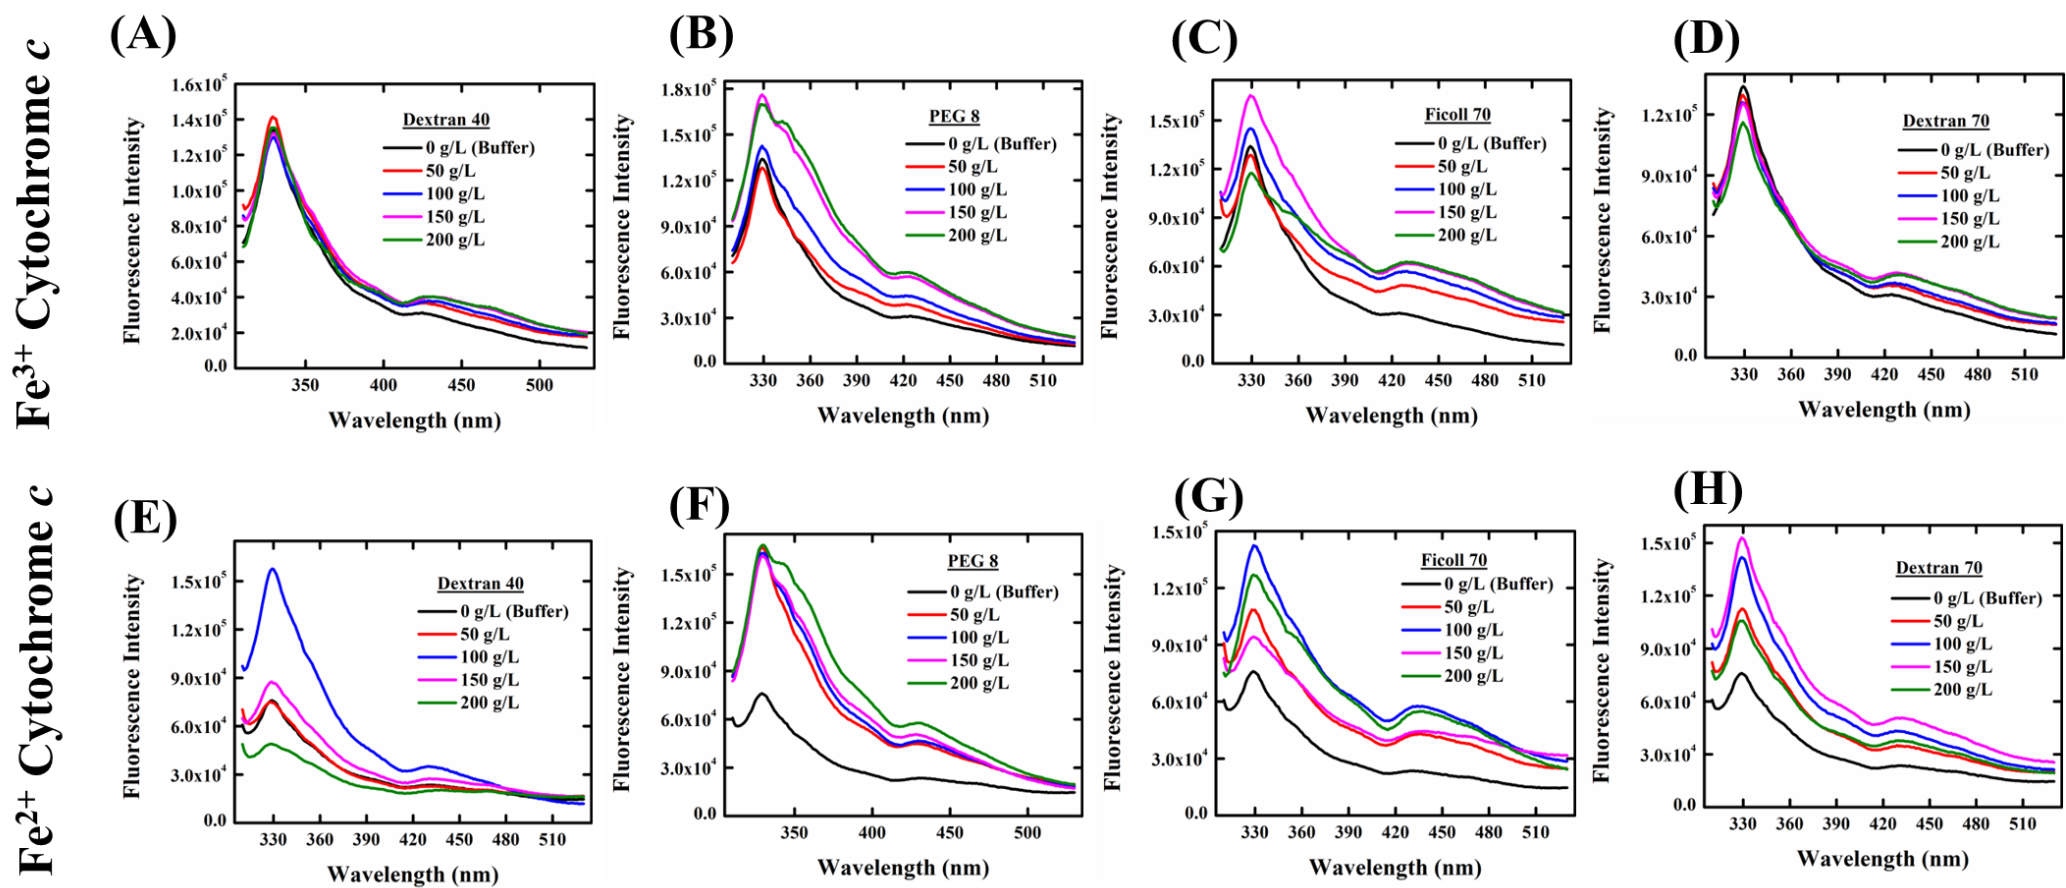

**Figure S12** – Variation in  $\tau_4$  of ferric Cyt *c* as a function of crowder concentrations comparing the effects of (A) Glucose, Dextran 40 and Dextran 70, (B) Sucrose and Ficoll 70, (C) Ethylene glycol and PEG 8 and the similar comparison of ferrous Cyt *c* comparing (D) Glucose, Dextran 40 and Dextran 70, (E) Sucrose and Ficoll 70, (F) Ethylene glycol and PEG 8.

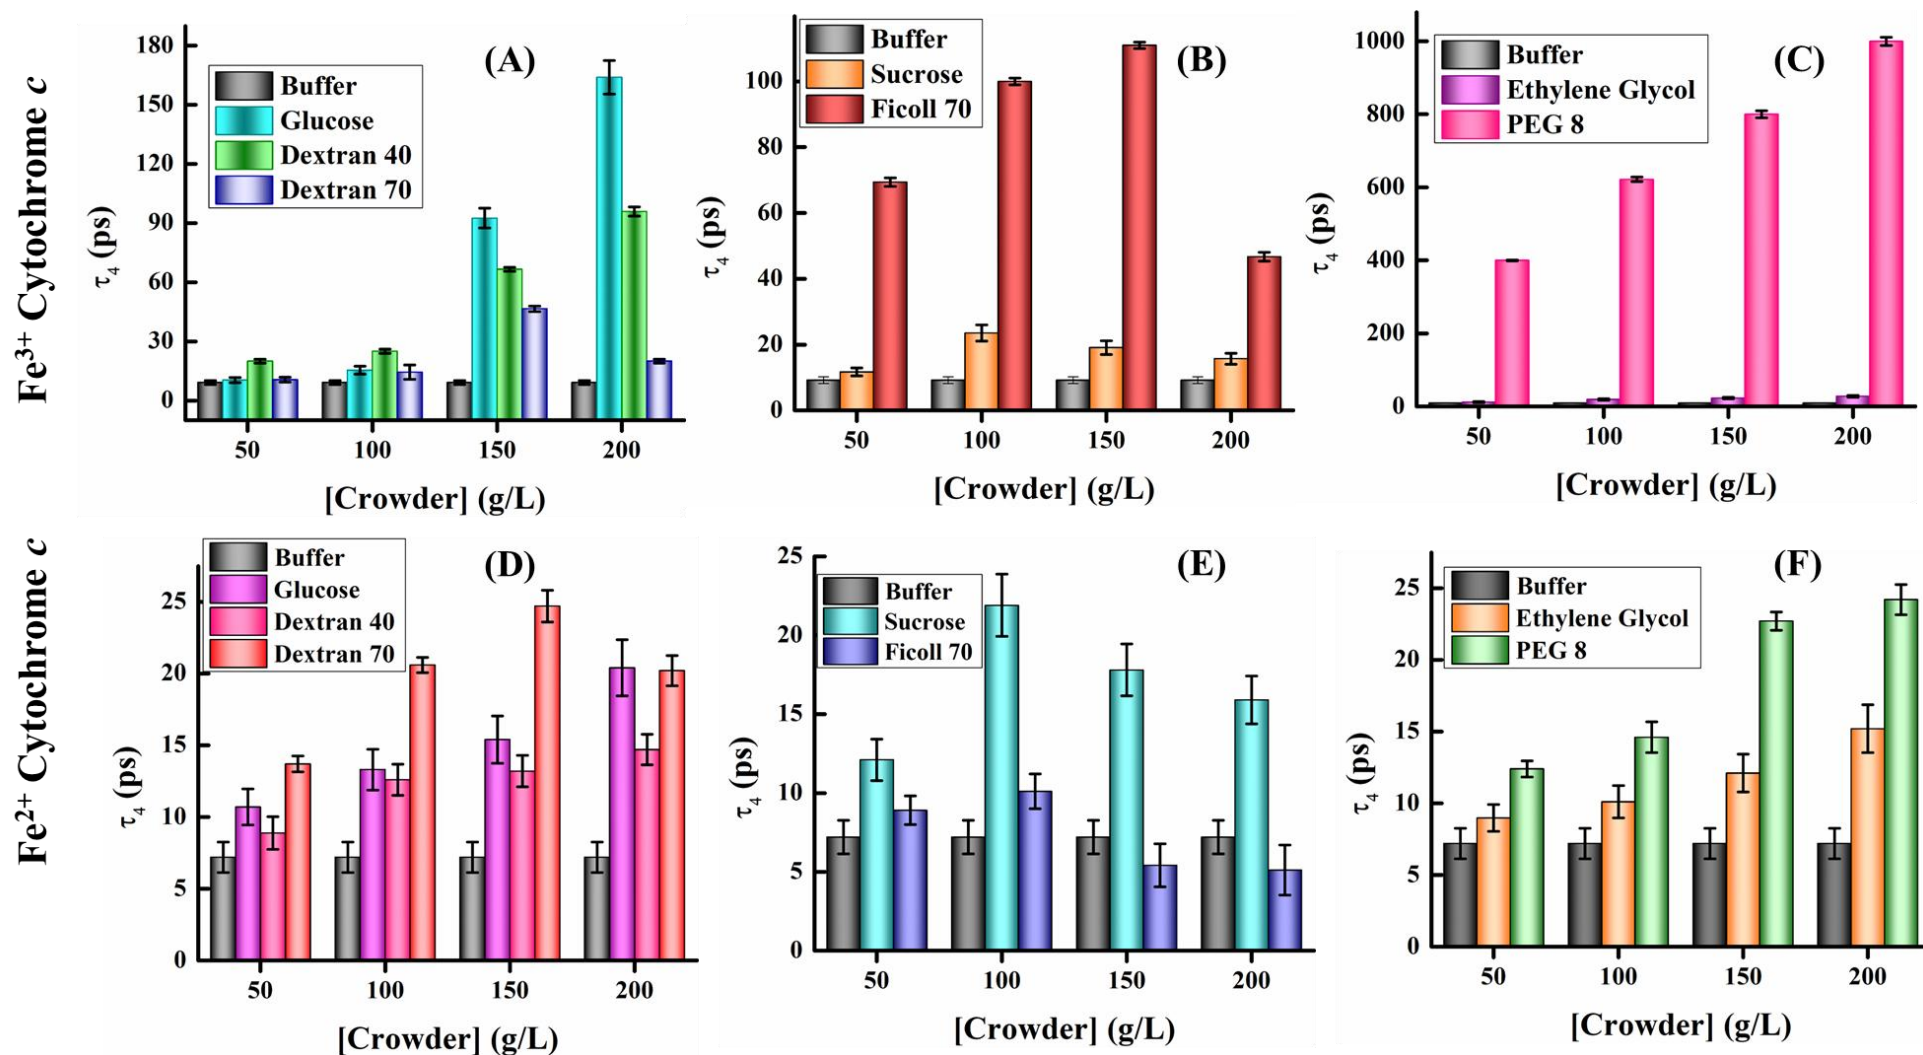

**Figure S13** – Secondary structure of Fe<sup>3+</sup> Cyt *c* obtained at 25 °C in the presence of buffer and small molecule crowders of (A) 100 g/L, (B) 200 g/L and Fe<sup>2+</sup> Cyt *c* in the presence of crowders of (C) 100 g/L, (D) 200 g/L. Active site structure of Fe<sup>3+</sup> Cyt *c* in the presence of buffer and crowders of (E) 100 g/L, (F) 200 g/L and Fe<sup>2+</sup> Cyt *c* in the presence of crowders of (G) 100 g/L, (H) 200 g/L as mentioned in the panels, with the data points in the CD spectra shown being an average of four independent scans (error bars not shown for clarity of data).

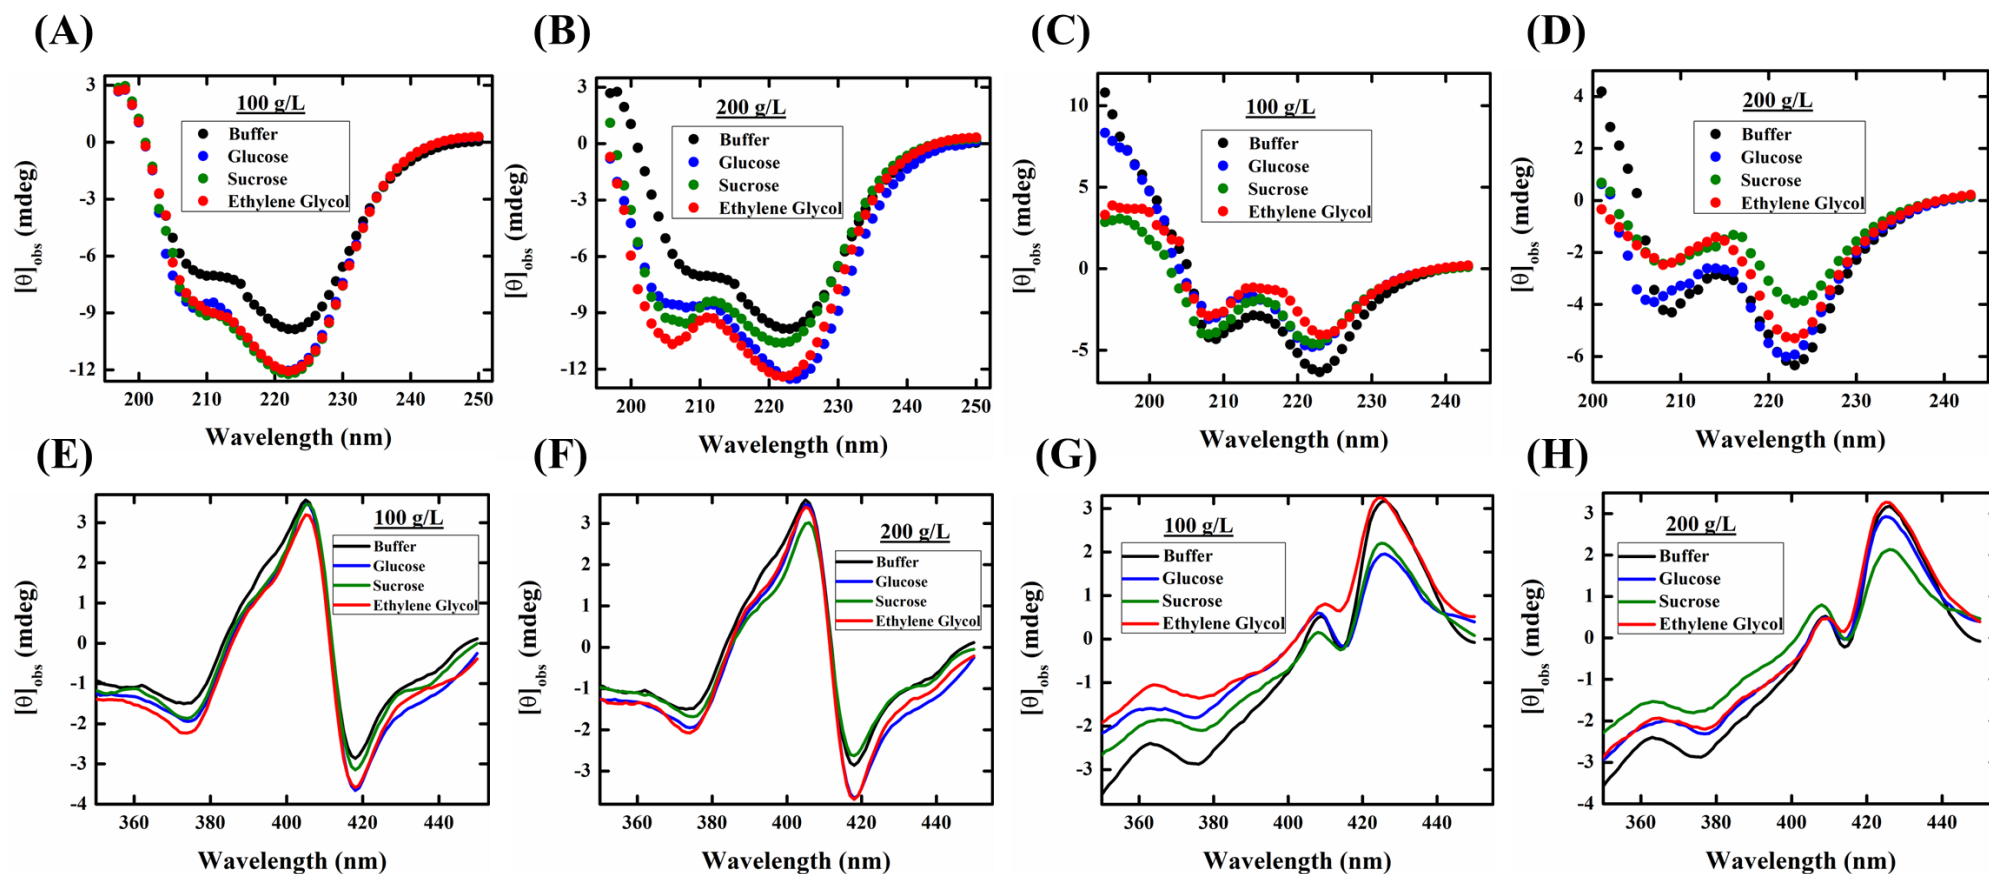

**Figure S14** – Active site structure of Cyt *c* in the presence of buffer and protein-based crowders (BSA and  $\beta$ -LG) of (A) ferric and (B) ferrous form at 50 and 100 g/L as mentioned in the panels, with the data points in the CD spectra shown being an average of four independent scans (error bars not shown for clarity of data).

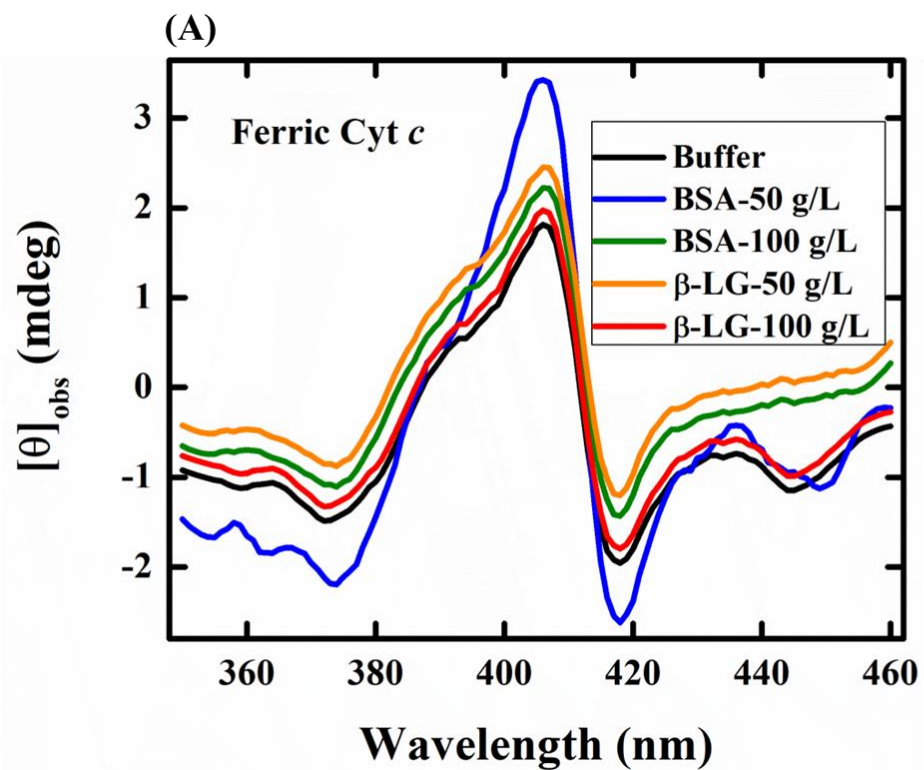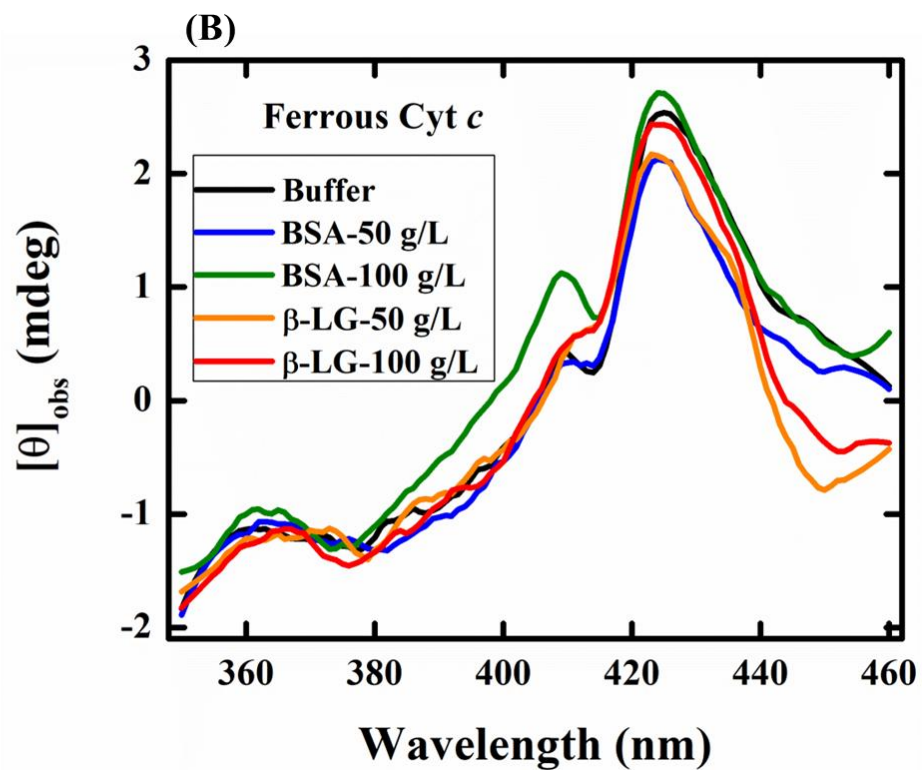



**Figure 15** – Ground state absorption spectra of ferric Cytochrome *c* in the presence of (A) BSA and (B)  $\beta$ -LG as crowder (Dashed arrow in black indicating the shift in solet band as a function of crowder concentration) [ Inset: Variation in absorbance of Q-band].

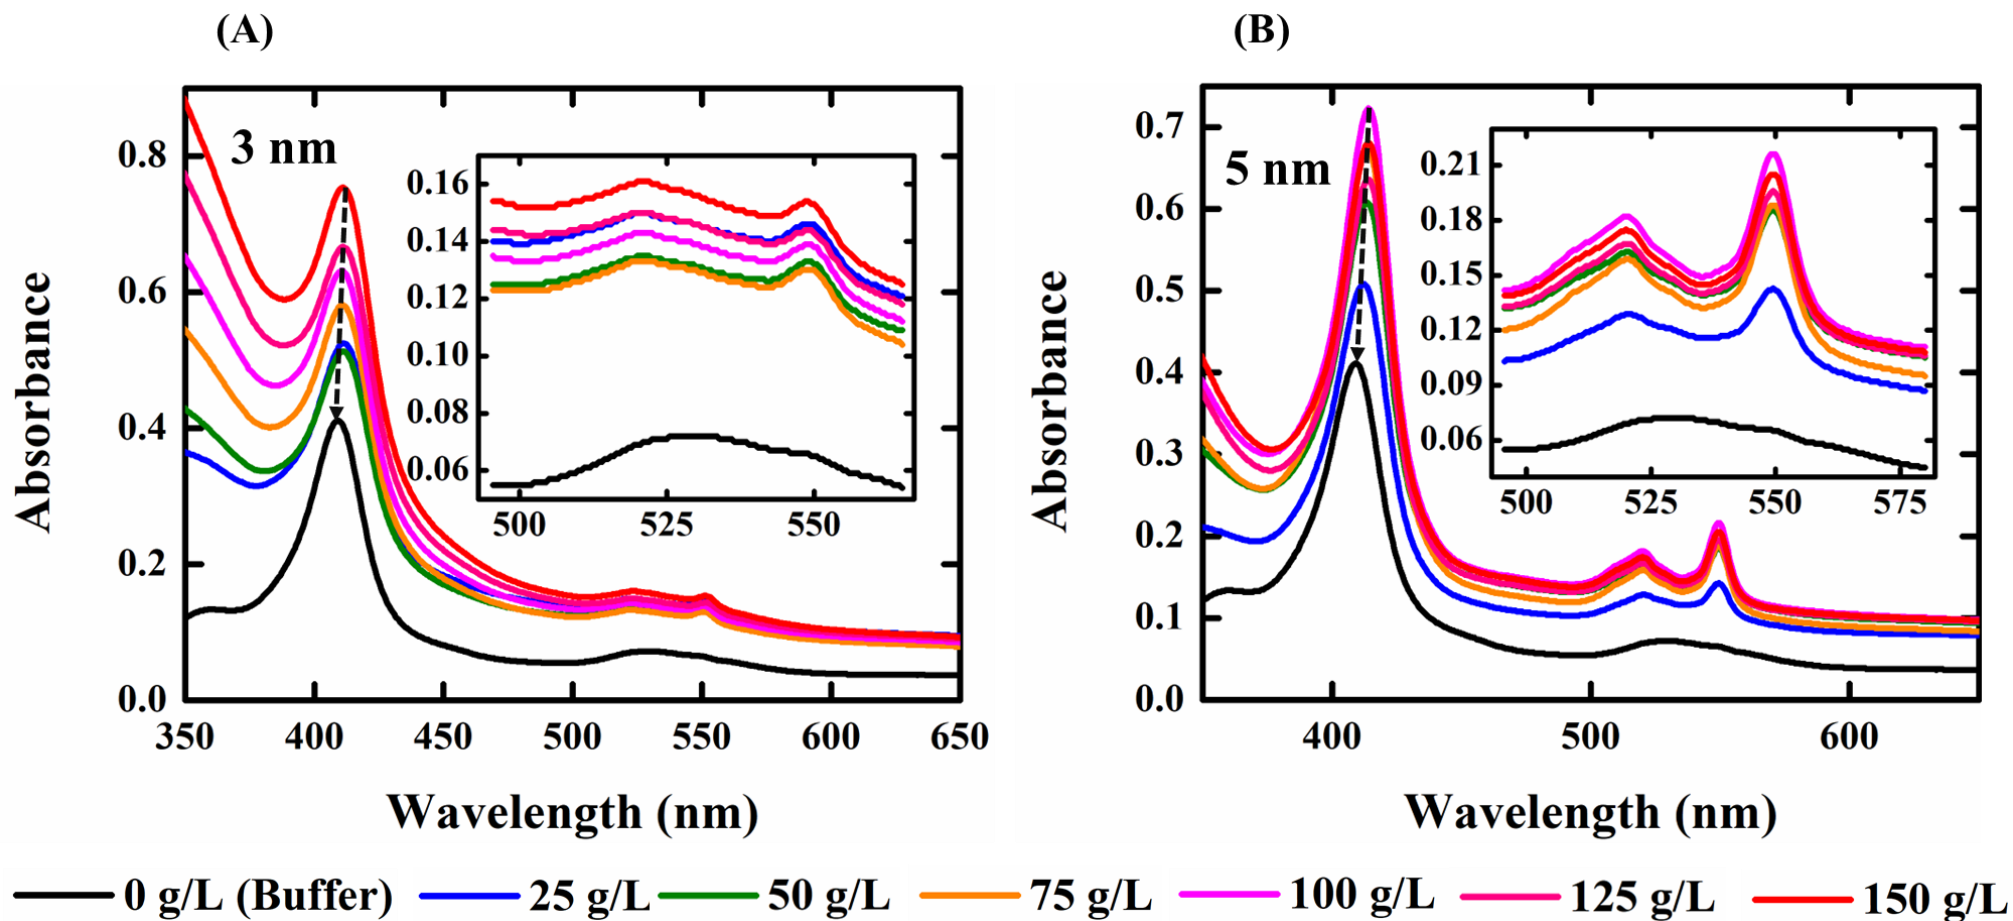

**Figure S16** – Comparison of (A) ground state absorption spectra of ferric Cyt *c* in buffer before and after exposure to pump laser and its chemically reduced form after 1 hour of laser exposure, (B) Transient absorption spectra of the ferric form at a later time delay of 20 ps with the difference in the ground state absorption spectra of both ferric and ferrous Cyt *c*. Panel B was used to calculate the quantum yield of photoreduction.

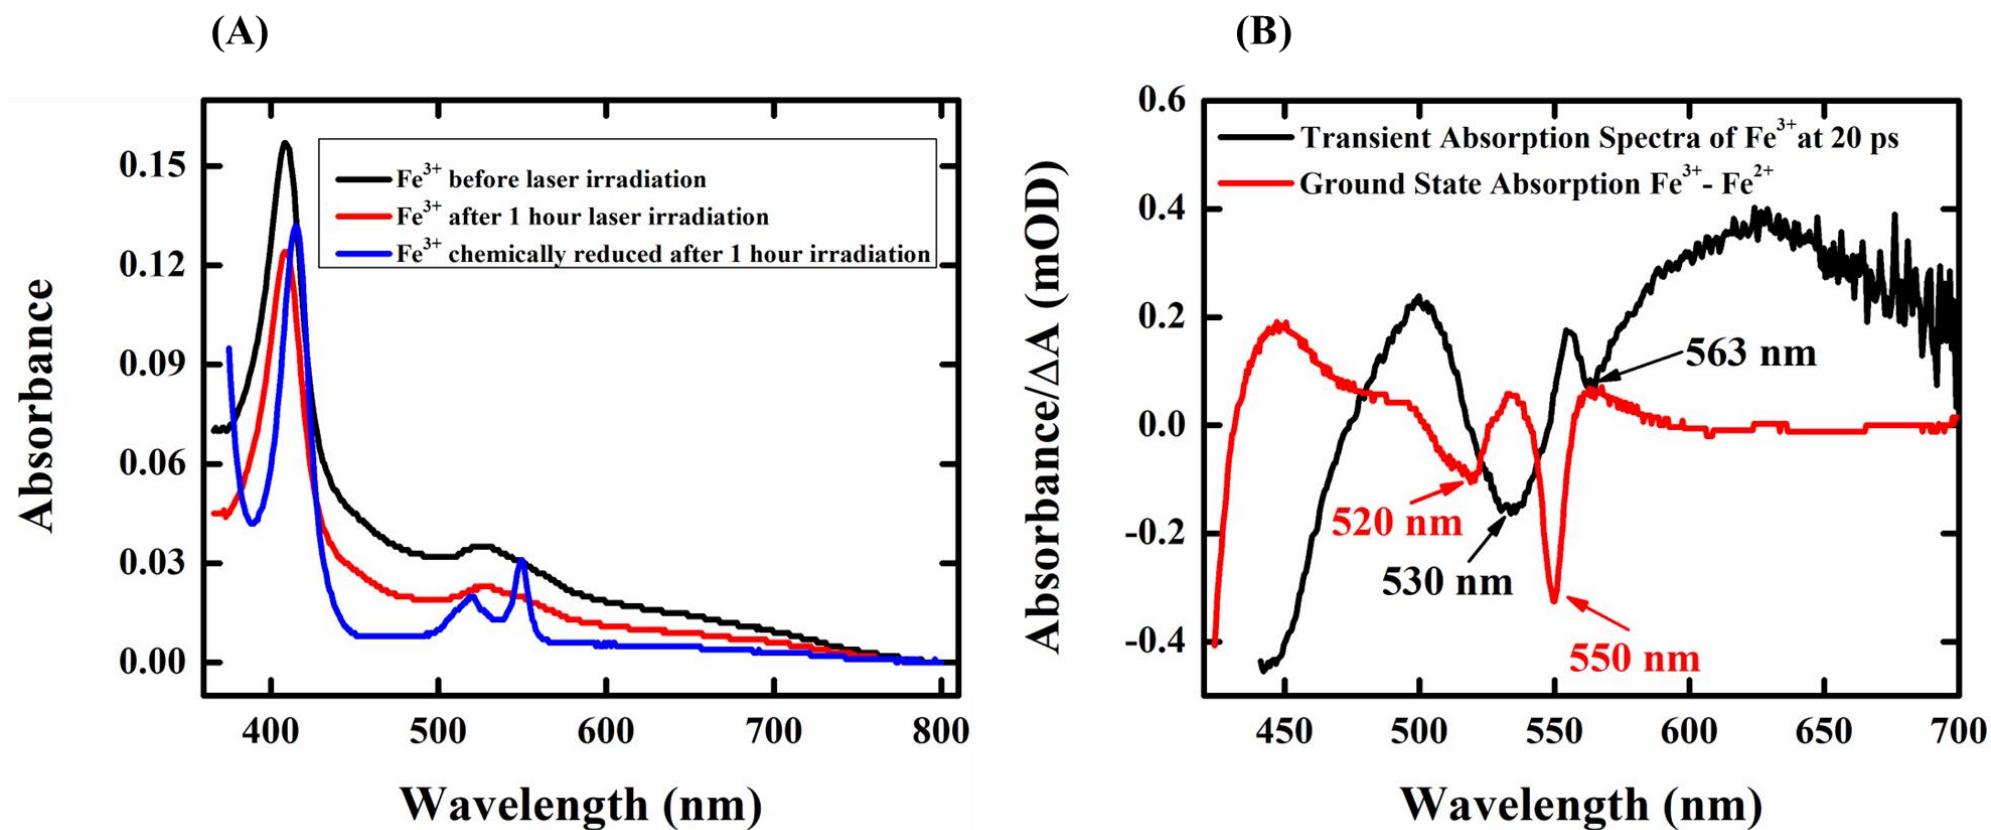

$$\Phi_{Photored} = \frac{A_{554}^{Black}}{A_{550}^{Red}} = 0.0012$$

**Figure S17** – (A) Comparison of the decay kinetics of ferric Cyt *c* probed at 600 nm in the ambient and aerobic conditions in the presence of buffer and synthetic polymeric crowders (200 g/L) as mentioned.

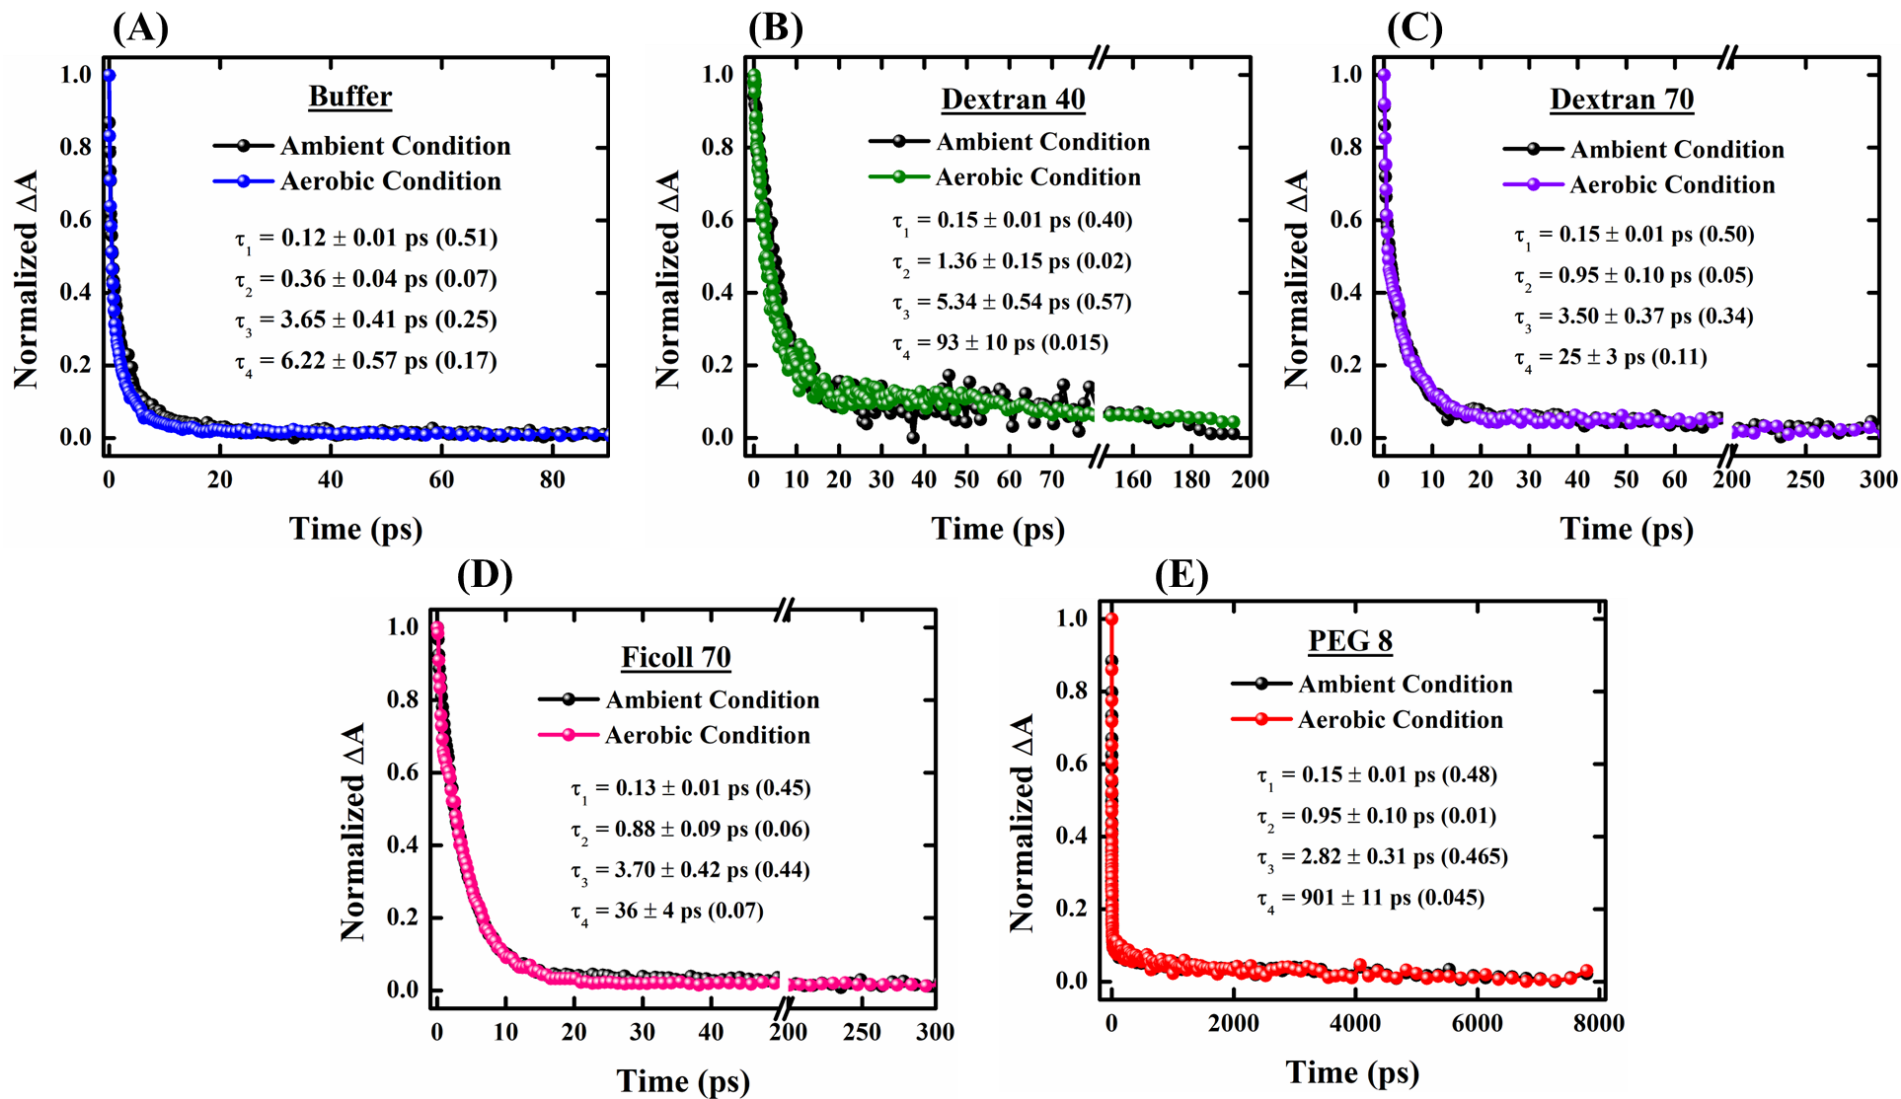

**Figure S18**– Comparison of (A) ground state absorption spectra of ferrous Cyt *c* in buffer before and after exposure to pump laser and its oxidized form before laser exposure, (B) Transient absorption spectra of the ferrous form at a later time delay of 20 ps with the difference in the ground state absorption spectra of both ferric and ferrous Cyt *c*. Panel B was used to calculate the quantum yield of photooxidation.

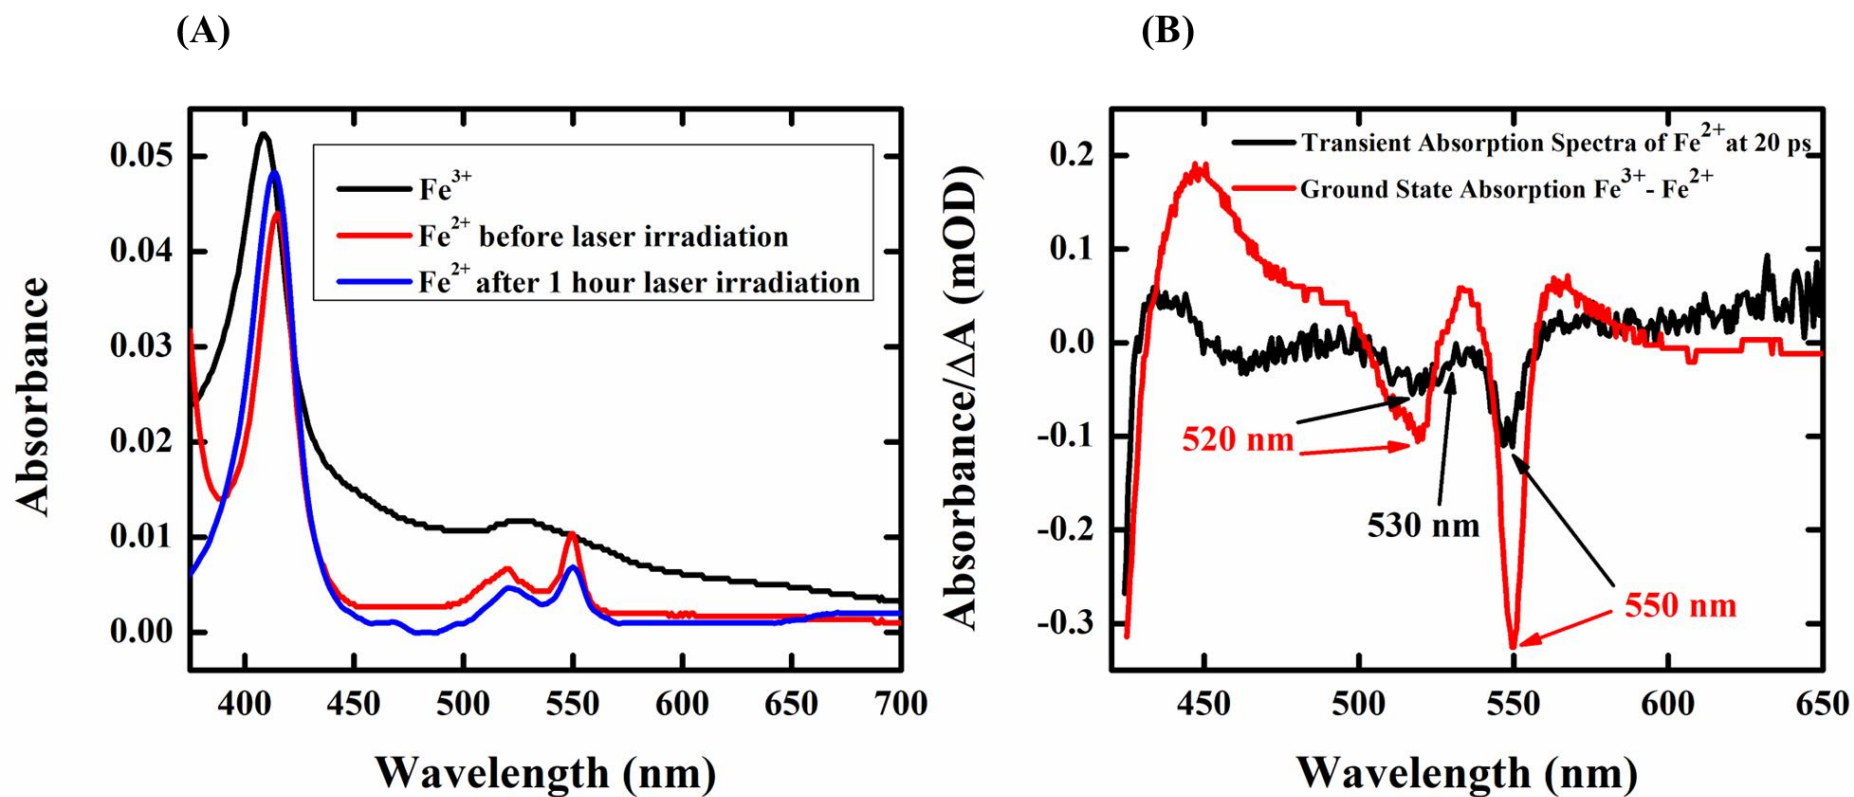

$$\Phi_{Photoox} = \frac{A_{530}^{Black}}{A_{550}^{Red}} = 0.00034$$

**Figure S19** – (A) Variation in ground state bleach signal ( $\Delta A$  at 530 nm) for ferric Cyt *c* in buffer (transient absorption spectra provided as inset) and (B) Transient kinetics probed at 600 nm as a function of increasing pump power.

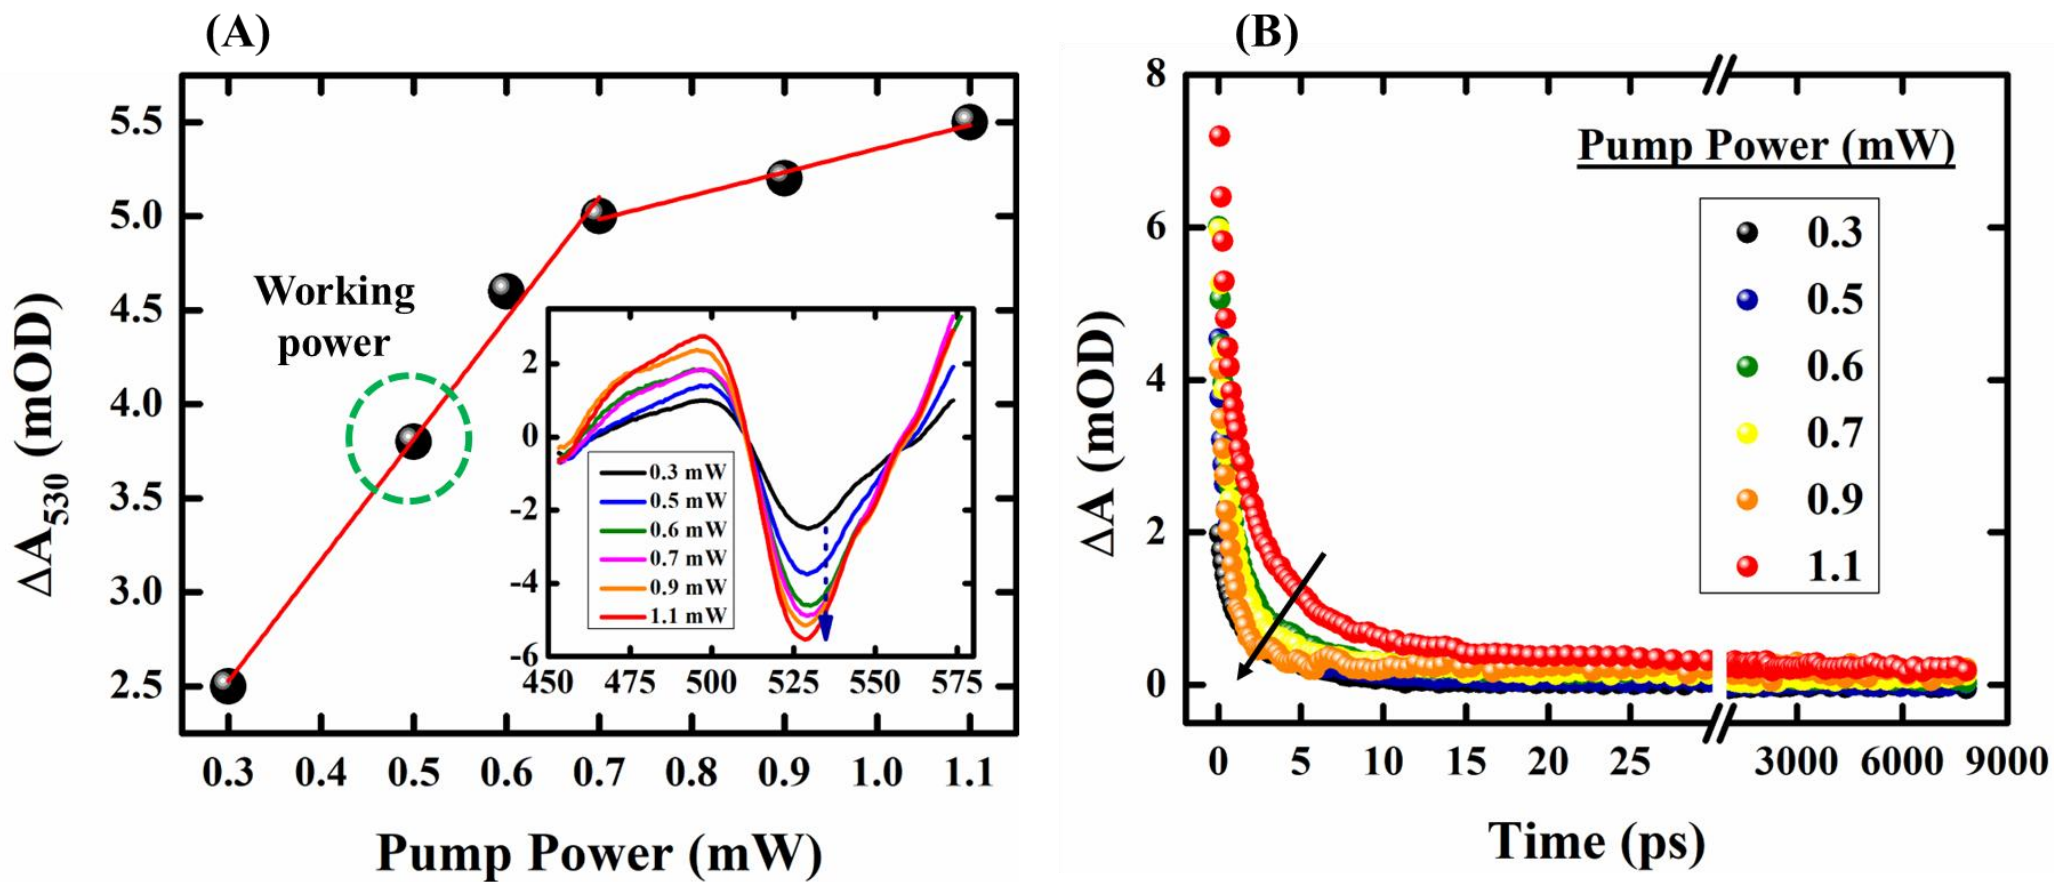

**Figure S20** – (A) Variation in ground state bleach signal ( $\Delta A$  at 550 nm) for ferrous Cyt *c* in buffer (transient absorption spectra provided as inset) and (B) Transient kinetics probed at 575 nm as a function of increasing pump power.

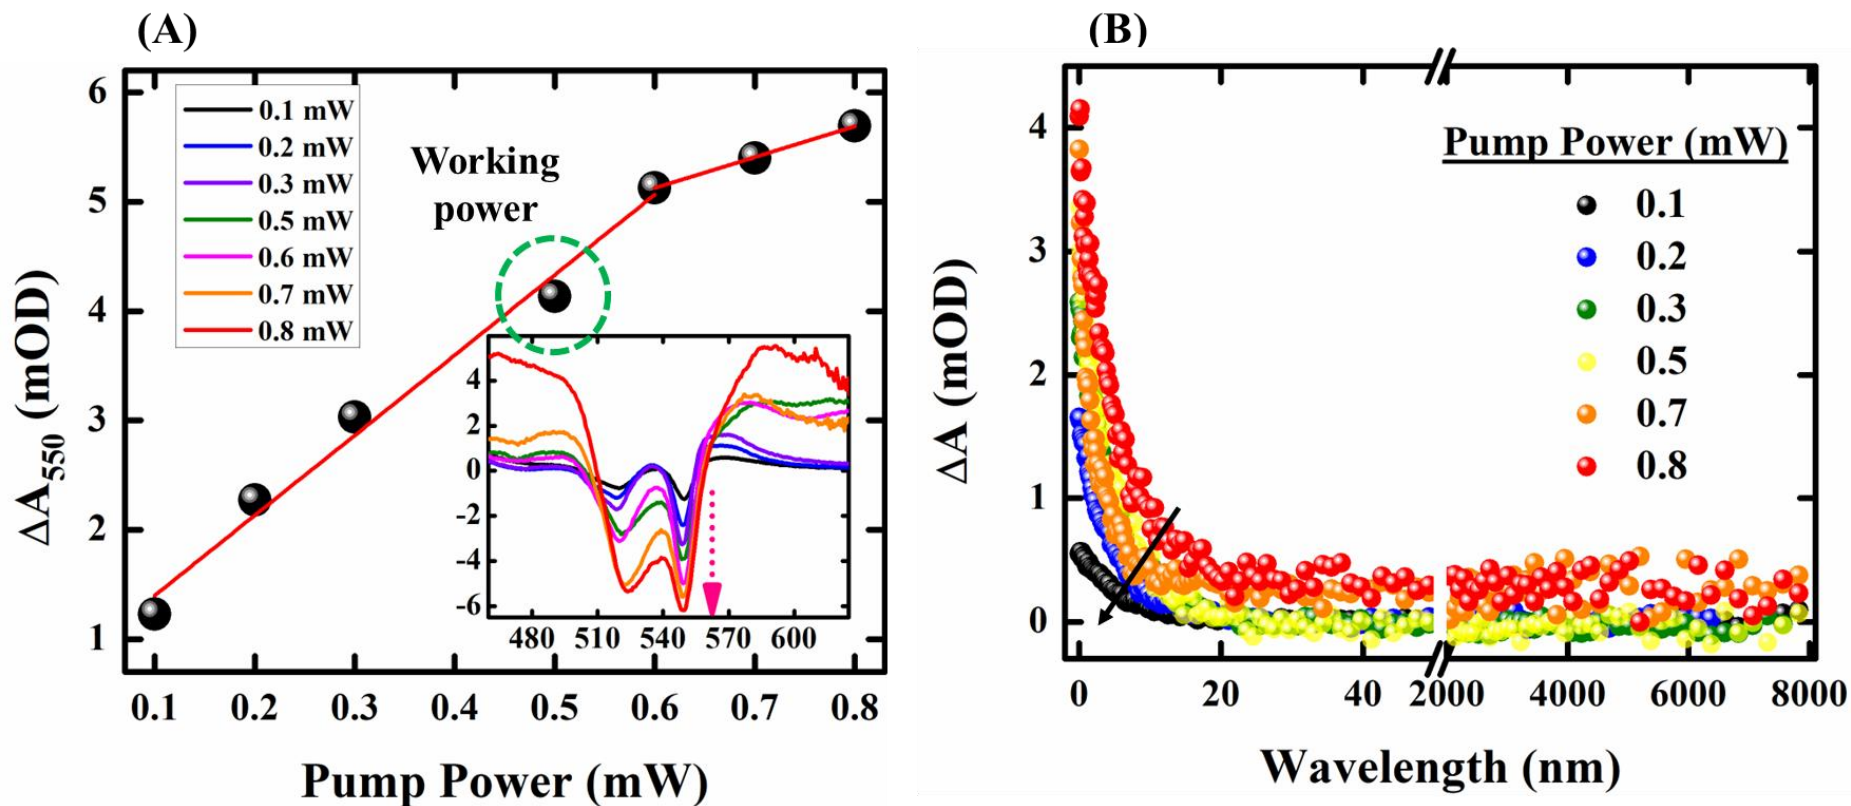

Supplement: d4cp03319a1.pdf [file d4cp03319a1.pdf]
